# Supplementary material for: The microRNA Cargo of Human Vaginal Extracellular Vesicles Differentiates Parasitic and Pathobiont Infections from Colonization by Homeostatic Bacteria
Source: Microorganisms. 2023 Feb 21;11(3):551. doi: 10.3390/microorganisms11030551 (PMC10054151; doi:10.3390/microorganisms11030551)
Supplement: Supplementary file 1 [file microorganisms-11-00551-s001.zip]

Archive with 6 entries (6 files):
- supplemental_info_final-20230221/Suppplemental-FiguresS1-4&TablesS6-7.pdf
- supplemental_info_final-20230221/Table S1 DE EV-miRNAs.xlsx
- supplemental_info_final-20230221/Table S2 Venn-diagram miRNA.xls
- supplemental_info_final-20230221/Table S3 miRNA targets Pb-Tv.xlsx
- supplemental_info_final-20230221/Table S4 KEGG tissues shared Tv-Pb UP_miRNA.xlsx
- supplemental_info_final-20230221/Table S5 genes top-3 clusters.xlsx
