# Supplementary material for: The microRNA Cargo of Human Vaginal Extracellular Vesicles Differentiates Parasitic and Pathobiont Infections from Colonization by Homeostatic Bacteria
Source: Microorganisms. 2023 Feb 21;11(3):551. doi: 10.3390/microorganisms11030551 (PMC10054151; doi:10.3390/microorganisms11030551)
Supplement: Supplementary file 1 [file microorganisms-11-00551-s001.zip › supplemental_info_final-20230221/Table S1 DE EV-miRNAs.xlsx]

## Sheet: L crispatus over control
hsa-miRNA	status	log2 FC	adjustedP	miRNA ID update (miRbase Release 22.1)
hsa-miR-1273e	up	1.26	0.02525	removed from miRBase
hsa-miR-3197	down	-2.13	0.02525	poor annotation
hsa-miR-6845-5p	down	-2.17	0.02525	poor annotation

## Sheet: T vaginalis over control
hsa-miRNA	status	log2 FC	adjustedP	miRNA ID update (miRbase Release 22.1)
hsa-miR-6846-5p	up	8.5	1.57742e-06	NA
hsa-let-7d-5p	up	4.19	4.35484e-05	NA
hsa-let-7e-5p	up	4.27	4.35484e-05	NA
hsa-let-7f-5p	up	4.35	4.35484e-05	NA
hsa-miR-1255b-2-3p	down	-4.3	4.35484e-05	NA
hsa-miR-3176	up	4.22	4.35484e-05	NA
hsa-miR-96-5p	up	4.25	4.35484e-05	NA
hsa-miR-4440	down	-4.76	4.80792e-05	NA
hsa-let-7a-5p	up	3.53	7.49154e-05	NA
hsa-miR-1915-3p	down	-3.53	7.49154e-05	NA
hsa-miR-20a-3p	up	3.54	7.49154e-05	NA
hsa-miR-362-5p	up	3.59	7.49154e-05	NA
hsa-miR-3674	down	-4.08	7.49154e-05	NA
hsa-miR-4726-5p	down	-3.77	7.49154e-05	NA
hsa-miR-548b-5p	down	-4.63	7.49154e-05	NA
hsa-miR-548w	down	-4.19	7.49154e-05	NA
hsa-miR-649	down	-4.99	7.49154e-05	NA
hsa-miR-6771-5p	up	3.5	7.49154e-05	NA
hsa-miR-6859-5p	down	-4.58	7.49154e-05	NA
hsa-miR-937-5p	down	-3.68	7.49154e-05	NA
hsa-miR-155-5p	up	3.26	8.57031e-05	NA
hsa-miR-1909-3p	down	-3.57	8.57031e-05	NA
hsa-miR-23c	up	3.66	8.57031e-05	NA
hsa-miR-297	down	-4.55	8.57031e-05	NA
hsa-miR-454-3p	up	3.3	8.57031e-05	NA
hsa-miR-548ay-5p	down	-3.81	8.57031e-05	NA
hsa-miR-6769a-3p	down	-3.9	8.57031e-05	NA
hsa-miR-6804-3p	down	-3.56	8.57031e-05	NA
hsa-miR-200c-3p	up	3.25	8.80478e-05	NA
hsa-miR-6862-3p	down	-3.63	9.32277e-05	NA
hsa-miR-15a-5p	up	3.2	9.45965e-05	NA
hsa-miR-548d-5p	down	-3.33	9.45965e-05	NA
hsa-miR-1225-3p	down	-3.18	9.6745e-05	NA
hsa-miR-1914-5p	down	-3.43	9.6745e-05	NA
hsa-miR-196b-5p	up	3.5	9.6745e-05	NA
hsa-miR-4539	down	-3.43	9.6745e-05	NA
hsa-miR-6895-5p	down	-3.86	9.6745e-05	NA
hsa-miR-3135a	down	-3.21	0.000108076	NA
hsa-miR-9-5p	up	3.24	0.000110286	NA
hsa-miR-196a-5p	up	3.22	0.000110762	NA
hsa-miR-1322	down	-3.65	0.000128442	NA
hsa-miR-1538	down	-3.5	0.000128442	NA
hsa-miR-4728-3p	down	-3.09	0.000128442	NA
hsa-miR-6789-3p	down	-4.12	0.000129363	NA
hsa-let-7i-5p	up	2.94	0.000130195	NA
hsa-miR-1273a	down	-3.09	0.000130195	NA
hsa-miR-15b-5p	up	2.87	0.000130195	NA
hsa-miR-181a-5p	up	2.87	0.000130195	NA
hsa-miR-28-5p	up	2.89	0.000130195	NA
hsa-miR-29b-3p	up	2.88	0.000130195	NA
hsa-miR-31-5p	up	2.94	0.000130195	NA
hsa-miR-32-5p	up	3.13	0.000130195	NA
hsa-miR-374b-5p	up	2.94	0.000130195	NA
hsa-miR-4312	down	-3.97	0.000130195	NA
hsa-miR-4691-5p	down	-4.45	0.000130195	NA
hsa-miR-6085	down	-3.5	0.000130195	NA
hsa-miR-6775-3p	down	-3.04	0.000130195	NA
hsa-miR-6792-3p	down	-3.5	0.000130195	NA
hsa-miR-6819-3p	down	-3.17	0.000130195	NA
hsa-miR-6893-3p	down	-3.51	0.000130195	NA
hsa-miR-4265	down	-3.56	0.000133041	NA
hsa-miR-548az-5p	down	-3.73	0.000133041	NA
hsa-miR-661	down	-3.89	0.000133041	NA
hsa-miR-6810-3p	down	-3.18	0.000133041	NA
hsa-miR-194-5p	up	2.92	0.000134352	NA
hsa-miR-21-5p	up	3.02	0.000134352	NA
hsa-let-7c-5p	up	2.93	0.000137735	NA
hsa-miR-4292	down	-3.27	0.000138996	NA
hsa-miR-17-3p	up	2.81	0.000139816	NA
hsa-miR-1229-3p	down	-3.2	0.000141939	NA
hsa-miR-99b-5p	up	2.73	0.000141939	NA
hsa-miR-100-5p	up	2.69	0.000143425	NA
hsa-miR-1202	down	-3.04	0.000143425	NA
hsa-miR-182-5p	up	2.79	0.000143425	NA
hsa-miR-200a-3p	up	2.84	0.000143425	NA
hsa-miR-210-5p	down	-2.81	0.000143425	NA
hsa-miR-33a-5p	up	2.86	0.000143425	NA
hsa-miR-3663-5p	down	-3.04	0.000143425	NA
hsa-miR-4722-3p	down	-3.06	0.000143425	NA
hsa-miR-548e-5p	down	-3.32	0.000143425	NA
hsa-miR-5585-3p	down	-2.82	0.000143425	NA
hsa-miR-582-5p	up	2.94	0.000143425	NA
hsa-miR-708-5p	up	2.76	0.000143425	NA
hsa-miR-3620-3p	down	-3.17	0.000144632	NA
hsa-miR-1228-3p	down	-3.02	0.000148873	NA
hsa-miR-1238-3p	down	-3.51	0.000148873	NA
hsa-miR-103a-3p	up	2.76	0.000149955	NA
hsa-let-7b-5p	up	2.8	0.000156186	NA
hsa-miR-1254	down	-2.79	0.000156186	NA
hsa-miR-135b-5p	up	2.93	0.000156186	NA
hsa-miR-331-3p	up	2.69	0.000156186	NA
hsa-miR-3687	down	-3.11	0.000156186	NA
hsa-miR-1256	down	-4.29	0.000158059	NA
hsa-miR-1273c	down	-2.85	0.000158743	NA
hsa-miR-24-2-5p	up	2.64	0.000158743	NA
hsa-miR-4252	down	-3.4	0.000158743	NA
hsa-miR-455-3p	up	2.65	0.000158743	NA
hsa-miR-6849-3p	down	-3.44	0.000158743	NA
hsa-miR-6882-3p	down	-3.11	0.000158743	NA
hsa-miR-1289	down	-3.81	0.000158841	NA
hsa-miR-200b-3p	up	2.65	0.000159718	NA
hsa-miR-1285-5p	down	-2.72	0.000164823	NA
hsa-miR-7974	down	-3.95	0.000164945	NA
hsa-miR-26a-5p	up	2.65	0.000165308	NA
hsa-miR-26b-5p	up	2.68	0.000165308	NA
hsa-miR-4732-3p	down	-3.47	0.000165308	NA
hsa-miR-6884-3p	down	-3.27	0.000165308	NA
hsa-miR-6796-5p	down	-4.1	0.000168888	NA
hsa-miR-6843-3p	down	-4.49	0.000168888	NA
hsa-miR-30c-5p	up	2.68	0.000169666	NA
hsa-miR-6845-5p	down	-3.05	0.000169666	NA
hsa-miR-99a-5p	up	2.61	0.000169666	NA
hsa-miR-10b-5p	up	2.83	0.000170285	NA
hsa-miR-6877-3p	down	-3.02	0.000170407	NA
hsa-miR-141-3p	up	2.69	0.000172616	NA
hsa-miR-181b-5p	up	2.57	0.000175428	NA
hsa-miR-1913	down	-2.66	0.000175999	NA
hsa-miR-4496	down	-3.23	0.000180843	NA
hsa-miR-1200	down	-3.86	0.000181205	NA
hsa-miR-1911-3p	down	-4.24	0.000181205	NA
hsa-miR-6890-3p	down	-4.2	0.000181205	NA
hsa-miR-944	up	2.66	0.000181205	NA
hsa-let-7g-5p	up	2.65	0.000182093	NA
hsa-miR-130b-5p	up	2.68	0.000182949	NA
hsa-miR-4421	down	-3.46	0.000182949	NA
hsa-miR-504-3p	down	-2.9	0.000182949	NA
hsa-miR-6813-3p	down	-3.03	0.000182949	NA
hsa-miR-6886-3p	down	-3.03	0.000182949	NA
hsa-miR-6800-3p	down	-3.28	0.000185233	NA
hsa-miR-6840-3p	down	-3.32	0.000186563	NA
hsa-miR-141-5p	up	2.56	0.000190058	NA
hsa-miR-3187-5p	down	-3.58	0.000190058	NA
hsa-miR-346	down	-3.32	0.000190058	NA
hsa-miR-4472	down	-3.78	0.000190058	NA
hsa-miR-4477a	down	-4.02	0.000190058	NA
hsa-miR-4512	down	-2.8	0.000190058	NA
hsa-miR-4685-5p	down	-3.14	0.000190058	NA
hsa-miR-548j-3p	down	-3.43	0.000190058	NA
hsa-miR-6738-3p	down	-3.62	0.000190058	NA
hsa-miR-6796-3p	down	-3.49	0.000190058	NA
hsa-miR-10a-5p	up	2.52	0.000192483	NA
hsa-miR-23b-3p	up	2.49	0.000192483	NA
hsa-miR-466	down	-4.13	0.000192483	NA
hsa-miR-6728-3p	down	-3.35	0.000192483	NA
hsa-miR-6744-3p	down	-3.96	0.000192483	NA
hsa-miR-921	down	-3.5	0.000192483	NA
hsa-miR-107	up	2.51	0.000194464	NA
hsa-miR-4417	down	-2.67	0.000194692	NA
hsa-miR-6848-5p	down	-3.13	0.000194692	NA
hsa-miR-6788-3p	down	-3.65	0.000195161	NA
hsa-miR-363-3p	up	2.56	0.000196958	NA
hsa-miR-6760-3p	down	-3.39	0.000198051	NA
hsa-miR-132-5p	up	2.51	0.000198648	NA
hsa-miR-370-3p	down	-3.01	0.000198648	NA
hsa-miR-6511b-3p	down	-2.58	0.000199935	NA
hsa-miR-5189-5p	down	-3.25	0.000201947	NA
hsa-miR-4640-3p	down	-3	0.000202688	NA
hsa-miR-23a-3p	up	2.47	0.000203002	NA
hsa-miR-33b-5p	up	2.51	0.000203002	NA
hsa-miR-4274	down	-2.98	0.000203002	NA
hsa-miR-452-5p	up	2.55	0.000203002	NA
hsa-miR-548h-5p	down	-3.22	0.000203002	NA
hsa-miR-631	down	-3.53	0.000203002	NA
hsa-miR-6776-3p	down	-2.93	0.000203002	NA
hsa-miR-6785-3p	down	-2.83	0.000203002	NA
hsa-miR-1273h-5p	down	-2.53	0.000206123	NA
hsa-miR-30b-5p	up	2.5	0.000206123	NA
hsa-miR-4723-3p	down	-3.16	0.000206123	NA
hsa-miR-4725-5p	down	-3.45	0.000206123	NA
hsa-miR-616-3p	down	-3.28	0.000206123	NA
hsa-miR-126-3p	up	2.45	0.000209762	NA
hsa-miR-181d-5p	up	2.49	0.000209963	NA
hsa-miR-4322	down	-2.89	0.000211829	NA
hsa-miR-30e-3p	up	2.41	0.000215446	NA
hsa-miR-652-3p	up	2.54	0.00021562	NA
hsa-miR-1269a	down	-3.77	0.000216411	NA
hsa-miR-330-5p	up	2.51	0.000218757	NA
hsa-miR-5684	down	-2.87	0.000235169	NA
hsa-miR-1273g-5p	down	-2.89	0.000235232	NA
hsa-miR-106b-5p	up	2.43	0.000236374	NA
hsa-miR-181c-5p	up	2.66	0.000236374	NA
hsa-miR-183-5p	up	2.43	0.000236374	NA
hsa-miR-425-5p	up	2.43	0.000236374	NA
hsa-miR-301a-3p	up	2.45	0.00023663	NA
hsa-miR-4502	down	-3.08	0.000246501	NA
hsa-miR-30a-3p	up	2.35	0.000248754	NA
hsa-miR-4446-3p	down	-2.92	0.000248754	NA
hsa-miR-5706	down	-3.39	0.000248754	NA
hsa-miR-4695-3p	down	-3.33	0.000253859	NA
hsa-miR-4707-5p	down	-3.23	0.000253859	NA
hsa-miR-5572	down	-3.84	0.000253859	NA
hsa-miR-6753-3p	down	-3.73	0.00025476	NA
hsa-miR-7160-5p	down	-2.87	0.00025476	NA
hsa-miR-1303	down	-2.53	0.000255963	NA
hsa-miR-3147	down	-2.73	0.000255963	NA
hsa-miR-3675-3p	down	-3.56	0.000260009	NA
hsa-miR-30d-5p	up	2.41	0.000260813	NA
hsa-miR-455-5p	up	2.43	0.000270768	NA
hsa-miR-301b	up	2.4	0.000280148	hsa-miR-301b-3p
hsa-miR-1231	down	-2.83	0.000280148	NA
hsa-miR-18a-5p	up	2.45	0.000280148	NA
hsa-miR-6811-3p	down	-3.2	0.000280148	NA
hsa-miR-589-3p	up	2.32	0.000284076	NA
hsa-miR-6734-3p	down	-3.12	0.000284255	NA
hsa-miR-1267	down	-3.27	0.000285267	NA
hsa-miR-200b-5p	up	2.41	0.000285267	NA
hsa-miR-378d	up	2.39	0.000285267	NA
hsa-miR-566	down	-2.47	0.000285267	NA
hsa-miR-5689	down	-3.53	0.000285267	NA
hsa-miR-7106-3p	down	-3.24	0.000285267	NA
hsa-miR-18b-5p	up	2.37	0.000289231	NA
hsa-miR-17-5p	up	2.38	0.00028952	NA
hsa-miR-1273d	down	-2.36	0.000293018	NA
hsa-miR-532-5p	up	2.27	0.000293018	NA
hsa-miR-224-5p	up	2.32	0.000294007	NA
hsa-miR-6870-5p	down	-2.85	0.000294007	NA
hsa-miR-3619-3p	down	-3.04	0.00029431	NA
hsa-miR-3661	down	-3.25	0.00029431	NA
hsa-miR-378i	up	2.35	0.00029431	NA
hsa-miR-557	down	-3.39	0.00029431	NA
hsa-miR-663b	down	-2.66	0.00029431	NA
hsa-miR-20a-5p	up	2.39	0.000295038	NA
hsa-miR-4632-3p	down	-3.05	0.000295038	NA
hsa-miR-4722-5p	down	-2.64	0.000296749	NA
hsa-miR-502-3p	up	2.29	0.000303418	NA
hsa-miR-221-5p	up	2.28	0.000309595	NA
hsa-miR-361-3p	up	2.42	0.000312394	NA
hsa-miR-934	up	2.38	0.000312394	NA
hsa-let-7d-3p	up	2.21	0.000314885	NA
hsa-miR-1299	down	-2.61	0.000314885	NA
hsa-miR-146b-3p	down	-3.12	0.000314885	NA
hsa-miR-27a-3p	up	2.4	0.000314885	NA
hsa-miR-378c	up	2.3	0.000314885	NA
hsa-miR-378e	up	2.29	0.000314885	NA
hsa-miR-493-3p	down	-3.46	0.000314885	NA
hsa-miR-501-5p	up	2.45	0.000314885	NA
hsa-miR-590-5p	up	2.35	0.000314885	NA
hsa-miR-6737-5p	down	-2.98	0.000314885	NA
hsa-miR-7109-3p	down	-3.02	0.000314885	NA
hsa-miR-4690-3p	down	-3.6	0.000315256	NA
hsa-miR-1282	down	-3.76	0.000320388	NA
hsa-miR-191-5p	up	2.27	0.000323763	NA
hsa-miR-6782-3p	down	-3.23	0.000325027	NA
hsa-miR-6822-3p	down	-3.39	0.000327948	NA
hsa-miR-93-5p	up	2.32	0.000327948	NA
hsa-miR-152-3p	up	2.26	0.000334281	NA
hsa-miR-429	up	2.3	0.000336107	NA
hsa-miR-1238-5p	down	-3.27	0.000337735	NA
hsa-miR-218-5p	up	2.27	0.000337735	NA
hsa-miR-3655	down	-3.2	0.000337735	NA
hsa-miR-6807-3p	down	-2.7	0.000337735	NA
hsa-miR-30a-5p	up	2.32	0.000337798	NA
hsa-miR-149-5p	up	2.24	0.000338686	NA
hsa-miR-20b-5p	up	2.3	0.000338686	NA
hsa-miR-651-5p	up	2.43	0.000338686	NA
hsa-miR-6726-3p	down	-2.51	0.000338686	NA
hsa-miR-6837-3p	down	-3.63	0.000338686	NA
hsa-miR-106a-5p	up	2.29	0.000348757	NA
hsa-miR-505-3p	up	2.23	0.000348757	NA
hsa-miR-4783-3p	down	-2.87	0.000353139	NA
hsa-miR-625-5p	up	2.29	0.000353243	NA
hsa-miR-6772-5p	down	-3.07	0.000353243	NA
hsa-miR-4649-3p	down	-2.94	0.000354268	NA
hsa-miR-378a-3p	up	2.27	0.000360998	NA
hsa-miR-6511a-5p	down	-2.47	0.000360998	NA
hsa-miR-378g	up	2.24	0.000363456	NA
hsa-miR-1976	down	-2.48	0.000363692	NA
hsa-miR-664a-3p	up	2.28	0.000366457	NA
hsa-miR-660-5p	up	2.24	0.000371041	NA
hsa-miR-29a-5p	up	2.35	0.000371862	NA
hsa-miR-342-5p	up	2.73	0.000371862	NA
hsa-miR-5009-5p	down	-3.86	0.000374935	NA
hsa-miR-7106-5p	down	-2.6	0.000375122	NA
hsa-miR-19a-3p	up	2.29	0.00037855	NA
hsa-miR-342-3p	up	2.21	0.00037855	NA
hsa-miR-769-5p	up	2.15	0.00037855	NA
hsa-miR-1915-5p	down	-2.63	0.000379913	NA
hsa-miR-19b-3p	up	2.24	0.000379913	NA
hsa-miR-4280	down	-3.67	0.000379913	NA
hsa-miR-92a-3p	up	2.23	0.000379913	NA
hsa-miR-6778-3p	down	-3.53	0.000382203	NA
hsa-miR-7111-3p	down	-2.99	0.000383089	NA
hsa-miR-185-5p	up	2.21	0.000385831	NA
hsa-miR-1233-3p	down	-2.78	0.000390055	NA
hsa-miR-16-5p	up	2.32	0.000390055	NA
hsa-miR-222-3p	up	2.27	0.000390055	NA
hsa-miR-30e-5p	up	2.24	0.000390055	NA
hsa-miR-503-5p	up	2.14	0.000390055	NA
hsa-miR-548y	down	-3.78	0.000391385	NA
hsa-miR-449b-3p	down	-2.77	0.000392475	NA
hsa-miR-4663	down	-3.23	0.000393531	NA
hsa-miR-500a-5p	up	2.18	0.000393531	NA
hsa-miR-378f	up	2.18	0.000401062	NA
hsa-miR-6833-5p	down	-2.73	0.00040235	NA
hsa-miR-4538	down	-2.77	0.00040594	NA
hsa-miR-501-3p	up	2.21	0.00040594	NA
hsa-miR-598-3p	up	2.18	0.00040594	NA
hsa-miR-106b-3p	up	2.17	0.000410583	NA
hsa-miR-148b-3p	up	2.17	0.000410583	NA
hsa-miR-377-3p	up	2.24	0.000410583	NA
hsa-miR-4498	down	-2.56	0.000410583	NA
hsa-miR-193a-3p	up	2.18	0.000411918	NA
hsa-miR-22-5p	up	2.16	0.000411918	NA
hsa-miR-33b-3p	down	-2.83	0.000411918	NA
hsa-miR-4763-3p	down	-2.2	0.000413824	NA
hsa-miR-548ax	down	-3.27	0.000413824	NA
hsa-miR-584-5p	up	2.17	0.000413824	NA
hsa-miR-6735-3p	down	-2.86	0.000413824	NA
hsa-miR-5190	down	-3.06	0.00041461	NA
hsa-miR-4649-5p	down	-2.59	0.000415938	NA
hsa-miR-422a	up	2.26	0.00041759	NA
hsa-miR-6878-3p	down	-2.99	0.000423398	NA
hsa-miR-125a-5p	up	2.17	0.000424856	NA
hsa-miR-4269	down	-3.21	0.000432554	NA
hsa-miR-8071	down	-2.28	0.000432554	NA
hsa-miR-210-3p	up	2.16	0.000443654	NA
hsa-miR-361-5p	up	2.13	0.000444491	NA
hsa-miR-595	down	-3.24	0.000444491	NA
hsa-miR-1249	up	2.06	0.000449355	hsa-miR-1249-3p
hsa-miR-24-3p	up	2.13	0.000449355	NA
hsa-miR-4537	down	-3.19	0.000453812	NA
hsa-miR-4656	down	-2.22	0.000457843	NA
hsa-miR-6761-3p	down	-2.82	0.000457843	NA
hsa-miR-6779-5p	down	-2.59	0.000461668	NA
hsa-miR-1227-3p	down	-2.25	0.000463008	NA
hsa-miR-181a-2-3p	up	2.14	0.000464059	NA
hsa-miR-6825-3p	down	-2.26	0.000464059	NA
hsa-miR-193a-5p	up	2.08	0.000468232	NA
hsa-miR-484	up	2.04	0.000468232	NA
hsa-miR-5087	down	-4.14	0.000468232	NA
hsa-miR-6729-3p	down	-2.19	0.000468232	NA
hsa-miR-154-3p	up	2.56	0.000469536	NA
hsa-miR-205-5p	up	2.15	0.000469536	NA
hsa-miR-3127-3p	down	-2.38	0.000469536	NA
hsa-miR-5589-3p	down	-2.7	0.000469536	NA
hsa-miR-27b-3p	up	2.2	0.000471267	NA
hsa-miR-101-3p	up	2.25	0.000474548	NA
hsa-miR-128-3p	up	2.13	0.000474548	NA
hsa-miR-5586-3p	down	-3.34	0.000474548	NA
hsa-miR-624-5p	up	2.23	0.000474548	NA
hsa-miR-1229-5p	down	-2.32	0.000480605	NA
hsa-miR-629-5p	up	2.16	0.000481613	NA
hsa-miR-5694	down	-3.16	0.000486032	NA
hsa-miR-1236-3p	down	-3.1	0.000491798	NA
hsa-miR-876-5p	up	2.34	0.000491798	NA
hsa-miR-150-3p	down	-2.38	0.000502001	NA
hsa-miR-331-5p	up	2.09	0.000503023	NA
hsa-miR-92b-3p	up	2.12	0.000503437	NA
hsa-miR-151a-3p	up	2.11	0.000511829	NA
hsa-miR-34a-5p	up	2.14	0.000515477	NA
hsa-miR-324-5p	up	2.08	0.000516476	NA
hsa-miR-6511a-3p	down	-2.32	0.000517541	NA
hsa-miR-1304-3p	down	-2.15	0.000520678	NA
hsa-miR-1471	down	-2.21	0.000520678	NA
hsa-miR-193b-3p	up	2.09	0.000520678	NA
hsa-miR-3064-3p	down	-2.89	0.000520678	NA
hsa-miR-424-5p	up	2.14	0.000520678	NA
hsa-miR-495-3p	up	2.07	0.000520678	NA
hsa-miR-93-3p	up	2.15	0.000520678	NA
hsa-miR-140-5p	up	2.12	0.000525521	NA
hsa-miR-25-3p	up	2.12	0.000537398	NA
hsa-miR-7160-3p	down	-3.67	0.000540633	NA
hsa-miR-875-3p	down	-3.65	0.000556764	NA
hsa-miR-5698	down	-2.88	0.000557086	NA
hsa-miR-362-3p	up	2.09	0.000559947	NA
hsa-miR-4436b-3p	down	-2.59	0.000573506	NA
hsa-miR-221-3p	up	2.09	0.000573722	NA
hsa-miR-27b-5p	up	2.21	0.000576978	NA
hsa-miR-188-5p	up	2.01	0.000581989	NA
hsa-miR-502-5p	up	2.02	0.000581989	NA
hsa-miR-4267	down	-3.21	0.000582945	NA
hsa-miR-505-5p	up	2.19	0.000588175	NA
hsa-miR-4268	down	-3.37	0.000592489	NA
hsa-miR-4675	down	-2.67	0.000602396	NA
hsa-miR-500a-3p	up	2.13	0.000608425	NA
hsa-miR-6754-3p	down	-2.59	0.000612709	NA
hsa-miR-612	down	-2.63	0.000631122	NA
hsa-miR-6801-5p	down	-2.72	0.000631122	NA
hsa-miR-146b-5p	up	1.96	0.000632443	NA
hsa-miR-4665-5p	up	2.04	0.000633276	NA
hsa-miR-1324	down	-3.12	0.000638911	NA
hsa-miR-296-5p	up	1.99	0.000638911	NA
hsa-miR-4304	down	-2.93	0.000638911	NA
hsa-miR-5010-5p	up	2.62	0.000638911	NA
hsa-miR-6787-3p	down	-2.48	0.000640133	NA
hsa-miR-744-5p	up	2.14	0.000640133	NA
hsa-miR-1539	down	-2.42	0.00064037	NA
hsa-miR-324-3p	up	2.03	0.00064037	NA
hsa-miR-6793-5p	down	-2.67	0.000649496	NA
hsa-miR-345-3p	down	-2.24	0.000653363	NA
hsa-miR-1909-5p	down	-2.46	0.000677869	NA
hsa-miR-593-5p	down	-2.78	0.000683027	NA
hsa-miR-126-5p	up	2.15	0.000690163	NA
hsa-miR-130a-3p	up	2.08	0.000700458	NA
hsa-miR-589-5p	up	1.96	0.000702467	NA
hsa-miR-6078	down	-2.92	0.000705758	NA
hsa-miR-4429	up	2.08	0.000707756	NA
hsa-miR-6827-5p	down	-2.83	0.000711625	NA
hsa-miR-3607-3p	down	-2.63	0.000713674	NA
hsa-miR-2682-3p	down	-2.99	0.000717785	NA
hsa-miR-320a	up	2.14	0.000719857	NA
hsa-miR-3907	down	-2.69	0.000724856	NA
hsa-miR-6872-3p	down	-2.25	0.000725165	NA
hsa-miR-543	up	1.84	0.000738146	NA
hsa-miR-572	down	-2.65	0.000742553	NA
hsa-miR-320b	up	2.06	0.000745941	NA
hsa-miR-1180-3p	up	2.02	0.000749448	NA
hsa-miR-3917	down	-2.75	0.000749448	NA
hsa-miR-4254	down	-2.62	0.000749448	NA
hsa-miR-4483	down	-2.98	0.000749448	NA
hsa-miR-5088-5p	down	-2.29	0.000749448	NA
hsa-miR-579-3p	up	2.01	0.000749448	NA
hsa-miR-6823-3p	down	-2.58	0.00075105	NA
hsa-miR-134-3p	down	-3.42	0.000754168	NA
hsa-miR-885-3p	down	-2.33	0.000766666	NA
hsa-miR-6827-3p	down	-2.9	0.000771515	NA
hsa-miR-7843-5p	down	-3.14	0.000771515	NA
hsa-miR-5006-5p	down	-2.46	0.000777915	NA
hsa-miR-4793-3p	down	-3.07	0.000783586	NA
hsa-miR-6801-3p	down	-2.51	0.000783586	NA
hsa-miR-1272	down	-4.55	0.000784747	NA
hsa-miR-6750-3p	down	-2.79	0.000788981	NA
hsa-miR-4494	down	-2.87	0.000794204	NA
hsa-miR-1253	down	-3.59	0.000800361	NA
hsa-miR-18a-3p	up	1.83	0.00080114	NA
hsa-miR-5004-3p	down	-3.05	0.00080114	NA
hsa-miR-320c	up	2.03	0.000801711	NA
hsa-miR-3155b	down	-2.53	0.000809827	NA
hsa-miR-5196-3p	down	-2.52	0.000814349	NA
hsa-miR-186-5p	up	1.98	0.000815365	NA
hsa-miR-3677-5p	down	-2.84	0.000815365	NA
hsa-miR-320d	up	2.01	0.000832283	NA
hsa-miR-1269b	down	-2.84	0.000845788	NA
hsa-miR-6790-5p	down	-3.01	0.000850085	NA
hsa-miR-491-5p	up	1.92	0.000858276	NA
hsa-miR-4506	down	-4.37	0.000859781	NA
hsa-miR-6751-3p	down	-2.6	0.000861307	NA
hsa-miR-1301-3p	up	1.88	0.000861506	NA
hsa-miR-548v	down	-2.89	0.000861506	NA
hsa-miR-492	down	-2.45	0.000869049	NA
hsa-miR-425-3p	up	1.93	0.000873568	NA
hsa-miR-4463	down	-1.86	0.000873568	NA
hsa-miR-873-5p	up	1.98	0.000873649	NA
hsa-miR-7156-3p	down	-2.3	0.000876748	NA
hsa-miR-1537-3p	up	1.91	0.000877132	NA
hsa-miR-196a-3p	down	-3.18	0.000877132	NA
hsa-miR-365a-3p	up	2.01	0.000877132	NA
hsa-miR-9-3p	up	1.88	0.000877132	NA
hsa-miR-3116	down	-2.82	0.000884042	NA
hsa-miR-146a-3p	down	-2.65	0.000896416	NA
hsa-miR-6792-5p	down	-2.78	0.00090761	NA
hsa-miR-1184	down	-2.85	0.000913339	NA
hsa-miR-1293	up	1.89	0.000913789	NA
hsa-miR-3690	down	-2.79	0.000913789	NA
hsa-miR-7111-5p	down	-2.08	0.000925445	NA
hsa-miR-124-5p	down	-2.74	0.000929455	NA
hsa-miR-548ay-3p	down	-2.31	0.000929455	NA
hsa-miR-22-3p	up	1.98	0.000929975	NA
hsa-miR-5002-3p	down	-2.98	0.000929975	NA
hsa-miR-668-3p	down	-3.23	0.000929975	NA
hsa-miR-548ab	down	-3.51	0.00093808	NA
hsa-miR-4642	down	-3.09	0.000942054	NA
hsa-miR-6767-3p	down	-2.27	0.000942054	NA
hsa-miR-21-3p	up	1.91	0.000951537	NA
hsa-miR-574-5p	down	-1.94	0.000952842	NA
hsa-miR-181a-3p	up	2.02	0.00096101	NA
hsa-miR-340-5p	up	1.92	0.00096101	NA
hsa-miR-4680-5p	down	-3.04	0.00096101	NA
hsa-miR-4430	down	-1.98	0.000964013	NA
hsa-miR-6500-3p	down	-2.55	0.000964013	NA
hsa-miR-6791-5p	down	-1.96	0.000966632	NA
hsa-miR-323a-5p	down	-2.67	0.000996106	NA
hsa-miR-6836-5p	down	-2.08	0.00100018	NA
hsa-miR-668-5p	down	-2.83	0.00103532	NA
hsa-miR-5189-3p	down	-3.09	0.00103571	NA
hsa-miR-6736-5p	down	-2.49	0.0010582	NA
hsa-miR-6762-3p	down	-2.81	0.0010582	NA
hsa-miR-1296-5p	up	1.87	0.00106141	NA
hsa-miR-200a-5p	up	1.82	0.00108165	NA
hsa-miR-488-5p	down	-2.68	0.00108165	NA
hsa-miR-7850-5p	down	-2.98	0.00108165	NA
hsa-miR-4484	down	-2.46	0.00108229	NA
hsa-miR-6861-3p	down	-2.41	0.00108629	NA
hsa-miR-6809-3p	down	-2.46	0.00110028	NA
hsa-miR-5088-3p	down	-2.59	0.00114034	NA
hsa-miR-103a-2-5p	up	1.86	0.00114431	NA
hsa-miR-766-3p	down	-1.9	0.00115289	NA
hsa-miR-378b	up	2.05	0.00115951	NA
hsa-miR-4487	down	-1.97	0.00115951	NA
hsa-miR-670-5p	down	-3.07	0.00115951	NA
hsa-miR-6847-3p	down	-2.67	0.00116061	NA
hsa-miR-8089	down	-1.92	0.00117486	NA
hsa-miR-4299	down	-2.12	0.00118662	NA
hsa-miR-4743-5p	down	-2.4	0.00118662	NA
hsa-miR-6841-3p	down	-2.65	0.00118662	NA
hsa-miR-4706	down	-2.15	0.00119335	NA
hsa-miR-4306	up	1.84	0.00120288	NA
hsa-miR-320e	up	1.94	0.00120546	NA
hsa-let-7a-3p	up	2.19	0.00121542	NA
hsa-miR-421	up	1.82	0.00121744	NA
hsa-miR-6805-5p	down	-2.53	0.00121744	NA
hsa-miR-139-5p	up	1.72	0.00123052	NA
hsa-miR-487b-5p	down	-3.15	0.00123052	NA
hsa-miR-4486	down	-1.81	0.00123508	NA
hsa-miR-577	up	2.02	0.00124046	NA
hsa-miR-345-5p	up	1.81	0.00124328	NA
hsa-miR-554	down	-2.63	0.00124471	NA
hsa-miR-4461	down	-2.03	0.00124925	NA
hsa-miR-1587	down	-1.98	0.00126391	NA
hsa-miR-3180-3p	up	1.89	0.00126391	NA
hsa-miR-3192-3p	down	-2.43	0.00126391	NA
hsa-miR-33a-3p	up	1.81	0.00126391	NA
hsa-miR-34b-5p	up	1.87	0.00126391	NA
hsa-miR-3150b-5p	down	-2.25	0.00126996	NA
hsa-miR-4786-5p	down	-2.75	0.00132265	NA
hsa-miR-6735-5p	down	-2.16	0.00132265	NA
hsa-miR-1307-3p	up	1.79	0.00133083	NA
hsa-miR-4515	down	-2.41	0.00133083	NA
hsa-miR-877-5p	up	1.73	0.00134262	NA
hsa-miR-892b	down	-3.27	0.00135552	NA
hsa-miR-4327	down	-2.6	0.00137489	NA
hsa-miR-637	down	-2.41	0.0013822	NA
hsa-miR-10a-3p	up	1.88	0.00140396	NA
hsa-miR-4750-5p	down	-2.53	0.00140396	NA
hsa-miR-15b-3p	up	1.91	0.00141364	NA
hsa-miR-4769-3p	down	-2.19	0.00141364	NA
hsa-miR-4452	down	-2.47	0.00142928	NA
hsa-miR-4654	down	-1.99	0.00142928	NA
hsa-miR-4687-3p	down	-2.41	0.00145973	NA
hsa-miR-500b-5p	up	1.85	0.00146062	NA
hsa-miR-6877-5p	down	-1.99	0.00146198	NA
hsa-miR-6813-5p	down	-2.67	0.00147512	NA
hsa-miR-761	down	-2.94	0.00148224	NA
hsa-miR-1247-3p	down	-2.32	0.00149116	NA
hsa-miR-6829-5p	down	-1.88	0.00149116	NA
hsa-miR-378j	down	-2.46	0.00150762	NA
hsa-miR-562	down	-2.66	0.00150762	NA
hsa-miR-3689a-3p	down	-2.54	0.00151656	NA
hsa-miR-573	down	-2.95	0.00151656	NA
hsa-miR-6891-3p	down	-2.44	0.00151656	NA
hsa-miR-8063	down	-3.05	0.00151656	NA
hsa-miR-6889-5p	down	-2.42	0.00154341	NA
hsa-miR-450b-3p	down	-3.71	0.00155779	NA
hsa-miR-885-5p	down	-2.52	0.00155779	NA
hsa-miR-194-3p	down	-2.66	0.0015609	NA
hsa-miR-1251-3p	down	-2.52	0.00157156	NA
hsa-miR-125a-3p	up	1.68	0.00160627	NA
hsa-miR-6768-5p	down	-1.92	0.00160627	NA
hsa-miR-6747-3p	down	-1.87	0.00160711	NA
hsa-miR-6751-5p	down	-2.11	0.00165083	NA
hsa-miR-6506-5p	down	-2.88	0.00165853	NA
hsa-miR-548ae	down	-2.86	0.00171233	hsa-miR-548ae-3p
hsa-miR-29a-3p	up	1.78	0.00171233	NA
hsa-miR-7845-5p	up	2.06	0.00173303	NA
hsa-miR-6745	down	-2.62	0.00174182	NA
hsa-miR-6806-5p	down	-2.17	0.0017603	NA
hsa-miR-130b-3p	up	1.98	0.00177974	NA
hsa-miR-383-3p	down	-3.27	0.00180115	NA
hsa-miR-6514-3p	down	-2.4	0.0018039	NA
hsa-miR-4660	down	-2.39	0.0018169	NA
hsa-miR-660-3p	up	1.67	0.00182991	NA
hsa-miR-2355-5p	up	1.72	0.00190174	NA
hsa-miR-301a-5p	up	1.82	0.00190174	NA
hsa-miR-3680-5p	down	-2.26	0.00190174	NA
hsa-miR-4664-5p	up	1.81	0.00190174	NA
hsa-miR-4695-5p	down	-1.69	0.00190174	NA
hsa-miR-5571-3p	down	-2.57	0.00190174	NA
hsa-miR-6759-3p	down	-2.29	0.00192202	NA
hsa-miR-330-3p	up	1.63	0.0019331	NA
hsa-miR-7114-3p	down	-1.66	0.0019471	NA
hsa-miR-19b-1-5p	up	1.67	0.00201373	NA
hsa-miR-218-2-3p	down	-2.61	0.00201448	NA
hsa-miR-632	down	-2.46	0.00201448	NA
hsa-miR-644a	down	-3.05	0.00201448	NA
hsa-miR-6870-3p	down	-1.99	0.00201448	NA
hsa-miR-132-3p	up	1.72	0.0020286	NA
hsa-miR-6799-3p	down	-2.01	0.00203011	NA
hsa-miR-647	down	-2.27	0.00205229	NA
hsa-miR-6088	up	1.9	0.00210995	NA
hsa-miR-7-1-3p	up	1.7	0.00210995	NA
hsa-miR-205-3p	up	1.69	0.00213106	NA
hsa-miR-758-5p	down	-2.82	0.0021524	NA
hsa-miR-4701-5p	down	-2.2	0.0021866	NA
hsa-miR-1273e	down	-1.69	0.00218868	NA
hsa-miR-2110	up	1.68	0.00226514	NA
hsa-miR-6847-5p	down	-2.49	0.00229817	NA
hsa-miR-6748-5p	down	-2.77	0.00229943	NA
hsa-miR-7162-5p	down	-2.5	0.00233588	NA
hsa-miR-4728-5p	down	-1.72	0.002356	NA
hsa-miR-532-3p	up	1.57	0.00239112	NA
hsa-miR-370-5p	down	-2.9	0.00242929	NA
hsa-miR-133a-3p	down	-2.5	0.00243203	NA
hsa-miR-3118	down	-2.22	0.00243604	NA
hsa-miR-490-5p	down	-2.93	0.00243604	NA
hsa-miR-4734	down	-1.8	0.00243961	NA
hsa-miR-2276-5p	down	-2.41	0.00244678	NA
hsa-miR-6876-3p	down	-2.41	0.00244868	NA
hsa-miR-664b-3p	down	-1.9	0.00245364	NA
hsa-miR-6856-5p	down	-2.3	0.00245801	NA
hsa-miR-891b	down	-3.08	0.00248272	NA
hsa-miR-765	down	-2.14	0.00254845	NA
hsa-miR-2278	down	-2.04	0.00256155	NA
hsa-miR-3662	down	-2.95	0.00257395	NA
hsa-miR-3925-5p	down	-2.33	0.00257823	NA
hsa-miR-6772-3p	down	-2.46	0.00257823	NA
hsa-miR-4262	down	-3.21	0.00261106	NA
hsa-miR-2467-3p	down	-1.65	0.00261997	NA
hsa-miR-3064-5p	down	-1.93	0.00263558	NA
hsa-miR-6752-5p	down	-1.7	0.00263558	NA
hsa-miR-548aw	down	-1.98	0.00270128	NA
hsa-miR-449a	up	1.81	0.00278406	NA
hsa-miR-339-5p	up	1.57	0.00282118	NA
hsa-miR-3678-3p	down	-2.2	0.00284127	NA
hsa-miR-597-3p	down	-2.81	0.00285423	NA
hsa-miR-4721	down	-1.88	0.00286106	NA
hsa-miR-8069	down	-1.93	0.00293487	NA
hsa-miR-7154-5p	down	-3.23	0.00294577	NA
hsa-miR-454-5p	up	1.76	0.00296304	NA
hsa-miR-5584-5p	down	-3.53	0.00298882	NA
hsa-miR-192-5p	up	1.65	0.00303145	NA
hsa-miR-575	down	-1.92	0.00303145	NA
hsa-miR-3191-5p	down	-2.61	0.00316073	NA
hsa-let-7f-2-3p	up	1.95	0.00320153	NA
hsa-miR-101-5p	up	1.45	0.00323536	NA
hsa-miR-8057	down	-2.41	0.00323536	NA
hsa-miR-3614-5p	down	-2.22	0.00324462	NA
hsa-miR-1302	down	-2.42	0.00327385	NA
hsa-miR-542-3p	up	1.54	0.00328578	NA
hsa-miR-6737-3p	down	-1.96	0.00332937	NA
hsa-let-7f-1-3p	up	1.78	0.00337067	NA
hsa-miR-138-1-3p	down	-2.02	0.00340397	NA
hsa-miR-6507-5p	up	2.82	0.00343622	NA
hsa-miR-1250-5p	down	-2.16	0.00361785	NA
hsa-miR-195-5p	up	2.01	0.00369256	NA
hsa-miR-4519	down	-2.26	0.00371755	NA
hsa-miR-6165	down	-1.57	0.00371755	NA
hsa-miR-3162-5p	down	-2.23	0.00392534	NA
hsa-miR-6787-5p	down	-1.8	0.00392534	NA
hsa-miR-3154	down	-1.67	0.00394591	NA
hsa-miR-675-5p	down	-2.29	0.00394591	NA
hsa-miR-4756-5p	down	-2.39	0.00395159	NA
hsa-miR-4290	down	-2.13	0.00397313	NA
hsa-miR-1305	up	1.38	0.00397321	NA
hsa-miR-3680-3p	down	-2.97	0.00399098	NA
hsa-miR-4470	down	-2.04	0.00399098	NA
hsa-miR-1204	down	-2.37	0.0041323	NA
hsa-miR-646	down	-2.15	0.00414194	NA
hsa-miR-6834-5p	down	-2.09	0.00415042	NA
hsa-miR-3922-5p	down	-2.73	0.00421831	NA
hsa-miR-8077	down	-2.41	0.00426026	NA
hsa-miR-4701-3p	down	-1.72	0.00428737	NA
hsa-miR-34a-3p	up	1.41	0.00430479	NA
hsa-miR-651-3p	up	2.07	0.00430837	NA
hsa-miR-6757-3p	down	-2.14	0.00431948	NA
hsa-miR-8060	down	-2.43	0.00432813	NA
hsa-miR-1301-5p	down	-2.19	0.0043348	NA
hsa-miR-6799-5p	down	-1.64	0.00439253	NA
hsa-miR-6851-3p	down	-2.03	0.00439253	NA
hsa-miR-4329	down	-2.88	0.00442545	NA
hsa-miR-548k	up	2.12	0.00444236	NA
hsa-miR-6894-5p	down	-1.54	0.00448855	NA
hsa-miR-4514	down	-1.89	0.00450827	NA
hsa-miR-5589-5p	down	-1.95	0.00450827	NA
hsa-miR-6871-5p	down	-1.98	0.00451412	NA
hsa-miR-6720-5p	down	-2.43	0.0045742	NA
hsa-miR-7150	up	1.47	0.00461445	NA
hsa-miR-4314	down	-2.49	0.00470526	NA
hsa-miR-6750-5p	down	-1.94	0.00471615	NA
hsa-miR-6889-3p	down	-2.04	0.00473914	NA
hsa-miR-23b-5p	up	1.68	0.0047828	NA
hsa-miR-3191-3p	down	-1.98	0.00483403	NA
hsa-miR-329-5p	down	-2.49	0.00487806	NA
hsa-miR-4746-5p	down	-2.16	0.00503283	NA
hsa-miR-935	down	-2.28	0.00503587	NA
hsa-miR-6848-3p	down	-1.87	0.00513571	NA
hsa-miR-1224-5p	down	-1.77	0.00515439	NA
hsa-miR-711	up	1.55	0.00518438	NA
hsa-miR-373-3p	down	-2.45	0.0052086	NA
hsa-miR-6781-3p	down	-2.06	0.0052086	NA
hsa-miR-941	up	1.44	0.00524762	NA
hsa-miR-664b-5p	down	-1.83	0.0052695	NA
hsa-miR-148a-3p	up	1.56	0.00548901	NA
hsa-miR-4273	down	-2.63	0.00558538	NA
hsa-miR-378h	up	1.8	0.00559483	NA
hsa-miR-1911-5p	down	-2.96	0.00563888	NA
hsa-miR-1199-3p	down	-1.84	0.00564357	NA
hsa-miR-656-5p	down	-2.38	0.00572247	NA
hsa-miR-3679-5p	down	-1.73	0.00573342	NA
hsa-miR-181c-3p	up	1.56	0.00575775	NA
hsa-miR-5705	down	-2.45	0.00575775	NA
hsa-miR-16-1-3p	up	1.46	0.0058133	NA
hsa-miR-154-5p	up	1.36	0.0059586	NA
hsa-miR-6875-5p	down	-1.55	0.00600624	NA
hsa-miR-8053	down	-2.94	0.0060934	NA
hsa-miR-30d-3p	up	1.49	0.00610987	NA
hsa-miR-1234-3p	down	-1.51	0.00618045	NA
hsa-miR-130a-5p	down	-2.84	0.00626705	NA
hsa-miR-200c-5p	up	1.45	0.00627771	NA
hsa-miR-7851-3p	down	-1.54	0.00659268	NA
hsa-miR-5003-5p	down	-2.2	0.00663995	NA
hsa-miR-517a-3p	down	-3.23	0.00664551	NA
hsa-miR-6758-3p	down	-2.73	0.00664551	NA
hsa-miR-34c-5p	up	1.38	0.00665787	NA
hsa-miR-4690-5p	down	-1.43	0.00665787	NA
hsa-miR-634	down	-2.26	0.00665787	NA
hsa-miR-6779-3p	down	-1.79	0.0067709	NA
hsa-miR-5010-3p	up	1.56	0.00680612	NA
hsa-miR-4769-5p	down	-1.55	0.00697609	NA
hsa-miR-3177-5p	down	-2.21	0.00700177	NA
hsa-miR-5196-5p	down	-1.45	0.00700177	NA
hsa-miR-3926	down	-1.72	0.00705242	NA
hsa-miR-548g-3p	down	-2.77	0.00705242	NA
hsa-miR-4257	down	-1.77	0.00727074	NA
hsa-miR-5194	down	-2.01	0.00729755	NA
hsa-miR-675-3p	down	-2.35	0.00729755	NA
hsa-miR-4435	down	-2.08	0.00731382	NA
hsa-miR-4293	down	-2.28	0.00745751	NA
hsa-miR-1304-5p	down	-1.59	0.0075059	NA
hsa-miR-5197-5p	down	-2.67	0.0075059	NA
hsa-miR-127-3p	down	-1.92	0.00771535	NA
hsa-miR-6859-3p	down	-2.08	0.00772547	NA
hsa-miR-6849-5p	down	-1.79	0.00797754	NA
hsa-miR-6784-5p	down	-1.54	0.00799897	NA
hsa-miR-3977	down	-2.66	0.0081207	NA
hsa-miR-4302	down	-2.08	0.00813765	NA
hsa-miR-3974	down	-2.69	0.00815651	NA
hsa-miR-4507	up	1.47	0.00825168	NA
hsa-miR-6076	down	-1.73	0.00825731	NA
hsa-miR-6868-5p	down	-2.03	0.00825731	NA
hsa-miR-6874-3p	down	-2.15	0.00825731	NA
hsa-miR-760	down	-1.49	0.00828776	NA
hsa-miR-23a-5p	up	1.37	0.00832157	NA
hsa-miR-143-5p	down	-2.03	0.00841623	NA
hsa-miR-4433b-5p	down	-1.57	0.00844241	NA
hsa-miR-29c-5p	up	1.47	0.00861369	NA
hsa-miR-525-5p	down	-2.42	0.00866881	NA
hsa-miR-6797-5p	down	-1.41	0.00867841	NA
hsa-miR-6723-5p	down	-1.83	0.00870856	NA
hsa-miR-511-5p	down	-2.46	0.00872844	NA
hsa-miR-548ak	down	-1.76	0.00878851	NA
hsa-miR-7157-3p	down	-2.65	0.00878851	NA
hsa-miR-608	down	-2.45	0.00889475	NA
hsa-miR-604	down	-2.57	0.00896525	NA
hsa-miR-4786-3p	down	-2.27	0.00900978	NA
hsa-miR-197-5p	down	-1.41	0.00901537	NA
hsa-miR-4535	down	-1.74	0.00903873	NA
hsa-miR-5587-3p	down	-1.88	0.00905456	NA
hsa-miR-924	down	-2.8	0.00905456	NA
hsa-miR-4518	down	-2.81	0.00911414	NA
hsa-miR-3617-3p	down	-2.1	0.00913426	NA
hsa-miR-4691-3p	down	-1.99	0.00926048	NA
hsa-miR-764	down	-1.75	0.00926048	NA
hsa-miR-6754-5p	down	-1.61	0.00934716	NA
hsa-miR-6893-5p	down	-1.45	0.00961032	NA
hsa-miR-335-3p	up	1.63	0.00961935	NA
hsa-miR-6854-5p	down	-2.29	0.00961935	NA
hsa-miR-6807-5p	down	-1.69	0.00968438	NA
hsa-miR-3657	up	1.66	0.00976423	NA
hsa-miR-3198	down	-1.61	0.00979542	NA
hsa-miR-3607-5p	down	-1.48	0.00979542	NA
hsa-miR-4733-3p	down	-1.91	0.00979542	NA
hsa-miR-548t-5p	down	-1.67	0.00979542	NA
hsa-miR-6857-5p	down	-2.57	0.00981927	NA
hsa-miR-6887-3p	up	1.29	0.00985608	NA
hsa-miR-7109-5p	down	-1.67	0.0099382	NA
hsa-miR-545-3p	up	1.37	0.00995093	NA
hsa-miR-657	down	-1.86	0.00995093	NA
hsa-miR-876-3p	up	1.32	0.0100234	NA
hsa-miR-4738-3p	down	-2.34	0.0103743	NA
hsa-miR-450a-2-3p	down	-2.37	0.0105078	NA
hsa-miR-431-3p	down	-2.17	0.010643	NA
hsa-miR-1205	down	-2.07	0.0106883	NA
hsa-miR-6890-5p	down	-1.75	0.0107356	NA
hsa-miR-6815-3p	down	-1.64	0.0108534	NA
hsa-miR-125b-5p	up	1.46	0.0108626	NA
hsa-miR-6073	up	2.35	0.010884	NA
hsa-miR-29c-3p	up	1.38	0.0111154	NA
hsa-miR-4253	up	1.35	0.0111154	NA
hsa-miR-3683	down	-2.08	0.0114308	NA
hsa-miR-6759-5p	down	-2.54	0.0114308	NA
hsa-miR-6794-3p	down	-1.57	0.0114308	NA
hsa-miR-3609	down	-1.46	0.0118213	NA
hsa-miR-943	down	-1.78	0.0119983	NA
hsa-miR-6069	down	-2.26	0.0125182	NA
hsa-miR-6795-3p	down	-1.48	0.012966	NA
hsa-miR-5690	up	2.43	0.0130085	NA
hsa-miR-212-3p	up	1.24	0.0130269	NA
hsa-miR-365a-5p	down	-1.55	0.0130432	NA
hsa-miR-1183	down	-1.84	0.0130633	NA
hsa-miR-2909	down	-3.21	0.0133653	NA
hsa-miR-485-3p	up	1.31	0.0133887	NA
hsa-miR-4774-3p	down	-2.48	0.0135377	NA
hsa-miR-6124	down	-1.34	0.0135377	NA
hsa-miR-99b-3p	up	1.33	0.0136958	NA
hsa-miR-8062	down	-2.26	0.0137147	NA
hsa-miR-6887-5p	down	-1.37	0.0138153	NA
hsa-miR-4453	down	-1.91	0.0138984	NA
hsa-miR-593-3p	down	-2.28	0.013899	NA
hsa-miR-1207-5p	down	-1.24	0.0142991	NA
hsa-miR-95-3p	up	1.3	0.0144197	NA
hsa-miR-186-3p	up	1.16	0.0144788	NA
hsa-miR-219b-3p	down	-2.05	0.0144788	NA
hsa-miR-548e-3p	up	1.48	0.0144788	NA
hsa-miR-3186-5p	down	-1.95	0.0147176	NA
hsa-miR-6741-3p	down	-1.53	0.0151029	NA
hsa-miR-6127	down	-1.29	0.0151187	NA
hsa-miR-224-3p	up	1.69	0.0151601	NA
hsa-miR-3197	down	-1.67	0.0153204	NA
hsa-miR-3613-3p	up	1.32	0.0153525	NA
hsa-miR-3689a-5p	down	-2.12	0.0153763	NA
hsa-miR-4449	down	-1.29	0.0154082	NA
hsa-miR-889-5p	down	-3.53	0.0154191	NA
hsa-miR-671-5p	up	1.26	0.0157188	NA
hsa-miR-4447	down	-1.49	0.0158245	NA
hsa-miR-6812-5p	down	-1.43	0.0158245	NA
hsa-miR-3134	down	-2.18	0.0158377	NA
hsa-miR-920	down	-1.48	0.0159003	NA
hsa-miR-6803-3p	down	-1.32	0.0161477	NA
hsa-miR-5188	down	-2.54	0.016936	NA
hsa-miR-4305	down	-2.62	0.0171951	NA
hsa-miR-6769b-3p	down	-1.4	0.0173113	NA
hsa-miR-4525	down	-1.86	0.0177674	NA
hsa-miR-4676-3p	down	-1.55	0.017893	NA
hsa-miR-6853-5p	down	-1.82	0.0180227	NA
hsa-miR-302c-5p	down	-2.92	0.0181763	NA
hsa-miR-6736-3p	down	-1.56	0.0181763	NA
hsa-miR-614	down	-1.43	0.0183169	NA
hsa-miR-449b-5p	up	1.56	0.0186562	NA
hsa-miR-138-2-3p	down	-3.2	0.0189992	NA
hsa-miR-6501-3p	down	-1.92	0.0192239	NA
hsa-let-7g-3p	up	1.24	0.0194048	NA
hsa-miR-212-5p	up	1.31	0.0196159	NA
hsa-miR-6857-3p	down	-1.94	0.0197826	NA
hsa-miR-571	down	-1.91	0.0197943	NA
hsa-miR-541-3p	down	-1.71	0.0199219	NA
hsa-miR-323b-5p	down	-2.03	0.0201839	NA
hsa-miR-198	up	1.42	0.02026	NA
hsa-miR-4477b	down	-1.78	0.0204671	NA
hsa-miR-1262	up	1.87	0.0206071	NA
hsa-miR-613	down	-3.17	0.0206071	NA
hsa-miR-4655-5p	down	-1.24	0.0209743	NA
hsa-miR-6780b-5p	down	-1.28	0.0209743	NA
hsa-miR-6873-3p	down	-1.51	0.0209833	NA
hsa-miR-6500-5p	down	-2.15	0.0213102	NA
hsa-miR-325	down	-2.37	0.0217501	NA
hsa-miR-8061	down	-2.99	0.0221482	NA
hsa-miR-195-3p	down	-2.03	0.0222008	NA
hsa-miR-5090	down	-1.37	0.0222046	NA
hsa-miR-206	down	-2.92	0.0223853	NA
hsa-miR-6821-5p	down	-1.25	0.0223853	NA
hsa-miR-4467	down	-1.66	0.0225924	NA
hsa-miR-6830-3p	down	-1.99	0.0225924	NA
hsa-miR-2276-3p	down	-1.81	0.022677	NA
hsa-miR-1178-3p	down	-2.75	0.022729	NA
hsa-miR-1247-5p	down	-1.4	0.0227562	NA
hsa-miR-335-5p	up	1.3	0.0230469	NA
hsa-miR-4730	down	-1.81	0.0236197	NA
hsa-miR-34c-3p	up	1.11	0.0237494	NA
hsa-miR-520c-3p	down	-3.57	0.0238206	NA
hsa-miR-6747-5p	down	-1.3	0.023874	NA
hsa-miR-767-5p	down	-1.83	0.0239237	NA
hsa-miR-1263	down	-2.32	0.0240775	NA
hsa-miR-410-5p	down	-2.24	0.0241245	NA
hsa-miR-1250-3p	down	-1.92	0.024236	NA
hsa-miR-4802-5p	up	2.21	0.0246727	NA
hsa-miR-6501-5p	down	-2.19	0.0246727	NA
hsa-miR-4707-3p	down	-1.21	0.0246998	NA
hsa-miR-5191	down	-3.59	0.0246998	NA
hsa-miR-3975	down	-2.3	0.0255835	NA
hsa-miR-6791-3p	down	-1.95	0.0261694	NA
hsa-miR-4419a	down	-1.36	0.0265973	NA
hsa-miR-4476	down	-1.6	0.0265973	NA
hsa-miR-6892-3p	down	-1.28	0.0265973	NA
hsa-miR-3618	down	-2.52	0.0270061	NA
hsa-miR-4294	down	-1.6	0.0270257	NA
hsa-miR-6810-5p	down	-1.66	0.0276905	NA
hsa-miR-30c-2-3p	up	1.22	0.027725	NA
hsa-miR-5739	down	-1.3	0.0277911	NA
hsa-miR-3189-3p	down	-1.62	0.0278742	NA
hsa-miR-381-3p	up	1.68	0.0278805	NA
hsa-miR-6775-5p	down	-1.16	0.0283072	NA
hsa-miR-874-3p	up	1.11	0.0283072	NA
hsa-miR-193b-5p	up	1.14	0.0283172	NA
hsa-miR-6855-3p	down	-1.95	0.0285965	NA
hsa-miR-5680	down	-3.58	0.0295615	NA
hsa-miR-6819-5p	down	-1.47	0.0295615	NA
hsa-miR-7151-5p	down	-2.64	0.029903	NA
hsa-miR-6852-5p	down	-1.42	0.0304799	NA
hsa-miR-500b-3p	up	1.09	0.0307919	NA
hsa-miR-4270	down	-1.17	0.0309477	NA
hsa-miR-5197-3p	down	-2.44	0.0310848	NA
hsa-miR-4667-3p	down	-1.4	0.0320075	NA
hsa-miR-3973	down	-2.88	0.0321565	NA
hsa-miR-298	down	-1.87	0.0321691	NA
hsa-miR-521	down	-2.41	0.0322814	NA
hsa-miR-376c-5p	down	-1.51	0.0322854	NA
hsa-miR-7113-5p	down	-1.63	0.0324128	NA
hsa-miR-4296	down	-1.88	0.0332151	NA
hsa-miR-7114-5p	down	-1.58	0.0333123	NA
hsa-miR-630	down	-2.75	0.0344874	NA
hsa-miR-211-5p	down	-2.15	0.0345607	NA
hsa-miR-6825-5p	down	-1.29	0.0345686	NA
hsa-miR-3670	down	-1.5	0.0364574	NA
hsa-miR-4297	down	-1.92	0.0365834	NA
hsa-miR-6755-3p	down	-2.38	0.0367678	NA
hsa-miR-6884-5p	down	-1.9	0.0367767	NA
hsa-miR-503-3p	down	-1.78	0.0368689	NA
hsa-miR-3916	down	-2.09	0.0370668	NA
hsa-miR-6873-5p	down	-1.74	0.0374243	NA
hsa-miR-6789-5p	down	-1.17	0.0383988	NA
hsa-miR-3922-3p	down	-2.33	0.0384125	NA
hsa-miR-4682	down	-1.53	0.0384125	NA
hsa-miR-1261	down	-3.32	0.0389682	NA
hsa-miR-6731-3p	down	-1.73	0.039119	NA
hsa-miR-3192-5p	down	-1.83	0.0399929	NA
hsa-miR-574-3p	down	-1.13	0.040906	NA
hsa-miR-6885-3p	down	-1.34	0.0410684	NA
hsa-miR-4639-3p	down	-1.84	0.0418677	NA
hsa-miR-3159	down	-1.97	0.0418887	NA
hsa-miR-7151-3p	down	-1.67	0.0420294	NA
hsa-miR-6128	down	-3.22	0.0420638	NA
hsa-miR-383-5p	down	-2.07	0.0422172	NA
hsa-miR-26b-3p	up	1.1	0.0423567	NA
hsa-miR-6081	down	-1.29	0.0426132	NA
hsa-miR-203b-5p	down	-2.78	0.0432603	NA
hsa-miR-6835-3p	down	-2.81	0.0449403	NA
hsa-miR-618	down	-2.58	0.0462149	NA
hsa-miR-4459	down	-1.06	0.0470162	NA
hsa-miR-5195-3p	down	-2.7	0.0470162	NA
hsa-miR-192-3p	down	-1.53	0.0472429	NA
hsa-miR-4669	down	-1.43	0.0474901	NA
hsa-miR-551a	up	1.05	0.0476863	NA
hsa-miR-4700-5p	down	-1.72	0.0478	NA
hsa-miR-424-3p	up	1.13	0.0484578	NA
hsa-miR-6835-5p	up	1.2	0.0496835	NA
hsa-miR-628-5p	up	1.16	0.0498372	NA
hsa-miR-6767-5p	down	-1.59	0.0498814	NA
hsa-miR-6797-3p	down	-1.4	0.0498814	NA

## Sheet: P bivia over control
hsa-miRNA	status	log2 FC	adjustedP	miRNA ID update (miRbase Release 22.1)
hsa-miR-5010-5p	up	5.97	3.1215e-05	NA
hsa-miR-6778-5p	up	3.86	4.50487e-05	NA
hsa-miR-146a-5p	up	3.65	8.64938e-05	NA
hsa-miR-4665-5p	up	3.55	8.64938e-05	NA
hsa-miR-6885-5p	up	2.67	0.000683223	NA
hsa-miR-7150	up	2.4	0.000228909	NA
hsa-let-7d-5p	up	2.25	0.000228909	NA
hsa-miR-96-5p	up	2.2	0.000240156	NA
hsa-let-7e-5p	up	2.18	0.000277	NA
hsa-let-7f-5p	up	2.17	0.000249502	NA
hsa-miR-6752-5p	up	2.13	0.000789405	NA
hsa-miR-4417	up	2	0.000456158	NA
hsa-miR-6780b-5p	up	1.99	0.000700734	NA
hsa-miR-362-5p	up	1.94	0.000487841	NA
hsa-miR-454-3p	up	1.88	0.000431896	NA
hsa-miR-20a-3p	up	1.86	0.000643986	NA
hsa-let-7a-5p	up	1.85	0.000489017	NA
hsa-miR-32-5p	up	1.82	0.000876851	NA
hsa-miR-200c-3p	up	1.81	0.000541039	NA
hsa-miR-196b-5p	up	1.81	0.00156201	NA
hsa-miR-6799-5p	up	1.8	0.00135155	NA
hsa-miR-33a-5p	up	1.77	0.000921062	NA
hsa-miR-6800-5p	up	1.76	0.000864859	NA
hsa-miR-181a-5p	up	1.75	0.000683223	NA
hsa-miR-15a-5p	up	1.75	0.000605046	NA
hsa-let-7i-5p	up	1.74	0.000815657	NA
hsa-miR-31-5p	up	1.72	0.000731338	NA
hsa-miR-23c	up	1.72	0.000984135	NA
hsa-let-7c-5p	up	1.72	0.000876851	NA
hsa-miR-155-5p	up	1.71	0.000700734	NA
hsa-miR-361-3p	up	1.7	0.00150363	NA
hsa-miR-708-5p	up	1.69	0.000700734	NA
hsa-miR-28-5p	up	1.69	0.000700734	NA
hsa-miR-99b-5p	up	1.68	0.000680012	NA
hsa-miR-501-5p	up	1.68	0.00173178	NA
hsa-miR-200a-3p	up	1.68	0.000901929	NA
hsa-let-7b-5p	up	1.68	0.000963642	NA
hsa-miR-331-3p	up	1.66	0.000851123	NA
hsa-miR-182-5p	up	1.66	0.000788725	NA
hsa-miR-135b-5p	up	1.66	0.00132179	NA
hsa-miR-21-5p	up	1.65	0.001337	NA
hsa-miR-181c-5p	up	1.65	0.00173178	NA
hsa-miR-17-3p	up	1.65	0.000982427	NA
hsa-miR-141-3p	up	1.65	0.00119064	NA
hsa-miR-582-5p	up	1.64	0.00195641	NA
hsa-miR-29b-3p	up	1.64	0.00096574	NA
hsa-miR-181b-5p	up	1.64	0.000841864	NA
hsa-miR-103a-3p	up	1.64	0.000975412	NA
hsa-miR-455-3p	up	1.63	0.000876851	NA
hsa-miR-181d-5p	up	1.61	0.00121327	NA
hsa-miR-10b-5p	up	1.61	0.00217869	NA
hsa-miR-6126	up	1.6	0.00173178	NA
hsa-miR-15b-5p	up	1.59	0.000788725	NA
hsa-miR-9-5p	up	1.57	0.00201036	NA
hsa-miR-425-5p	up	1.55	0.00132179	NA
hsa-miR-378b	up	1.55	0.00253008	NA
hsa-miR-374b-5p	up	1.55	0.00126677	NA
hsa-miR-194-5p	up	1.54	0.00171402	NA
hsa-miR-378e	up	1.53	0.001337	NA
hsa-miR-378c	up	1.53	0.00151913	NA
hsa-miR-378i	up	1.52	0.00173178	NA
hsa-miR-26a-5p	up	1.52	0.00126677	NA
hsa-miR-196a-5p	up	1.52	0.00243263	NA
hsa-miR-130b-5p	up	1.52	0.00216347	NA
hsa-miR-107	up	1.52	0.00129866	NA
hsa-miR-455-5p	up	1.51	0.00220633	NA
hsa-miR-452-5p	up	1.51	0.00243263	NA
hsa-miR-378d	up	1.51	0.00201387	NA
hsa-miR-6516-5p	up	1.5	0.0036788	NA
hsa-miR-624-5p	up	1.5	0.00390679	NA
hsa-miR-301a-3p	up	1.5	0.00156693	NA
hsa-miR-27a-5p	up	1.5	0.0131888	NA
hsa-miR-27a-3p	up	1.5	0.00167758	NA
hsa-miR-342-5p	up	1.49	0.010514	NA
hsa-miR-23b-3p	up	1.49	0.00117563	NA
hsa-miR-4317	up	1.48	0.0351989	NA
hsa-miR-30c-5p	up	1.48	0.00171829	NA
hsa-miR-23a-3p	up	1.48	0.001337	NA
hsa-miR-100-5p	up	1.48	0.00127241	NA
hsa-miR-944	up	1.47	0.00228872	NA
hsa-miR-99a-5p	up	1.46	0.00171402	NA
hsa-miR-6741-5p	up	1.46	0.0184185	NA
hsa-miR-6516-3p	up	1.46	0.00707129	NA
hsa-miR-651-5p	up	1.46	0.00335958	NA
hsa-miR-181a-2-3p	up	1.46	0.00211647	NA
hsa-miR-33b-5p	up	1.45	0.00240999	NA
hsa-miR-30e-3p	up	1.45	0.00156936	NA
hsa-miR-301b	up	1.45	0.00258312	hsa-miR-301b-3p
hsa-miR-24-2-5p	up	1.45	0.00141933	NA
hsa-let-7g-5p	up	1.45	0.00204714	NA
hsa-miR-29a-5p	up	1.44	0.00368115	NA
hsa-miR-652-3p	up	1.43	0.00276186	NA
hsa-miR-422a	up	1.43	0.00301002	NA
hsa-miR-363-3p	up	1.43	0.00250927	NA
hsa-miR-30b-5p	up	1.43	0.00208002	NA
hsa-miR-26b-5p	up	1.43	0.00190746	NA
hsa-miR-18a-5p	up	1.43	0.00287723	NA
hsa-miR-378g	up	1.42	0.00237136	NA
hsa-miR-378a-3p	up	1.41	0.00274955	NA
hsa-miR-27b-3p	up	1.41	0.00243263	NA
hsa-miR-221-5p	up	1.41	0.0016211	NA
hsa-miR-210-3p	up	1.41	0.00251729	NA
hsa-miR-93-3p	up	1.4	0.00357077	NA
hsa-miR-625-5p	up	1.4	0.0030436	NA
hsa-miR-200b-3p	up	1.4	0.00194417	NA
hsa-miR-106b-5p	up	1.4	0.00211662	NA
hsa-miR-769-5p	up	1.39	0.00258912	NA
hsa-miR-10a-5p	up	1.39	0.00231946	NA
hsa-miR-378f	up	1.38	0.00243256	NA
hsa-miR-30d-5p	up	1.38	0.00274955	NA
hsa-miR-30a-3p	up	1.38	0.00217869	NA
hsa-miR-224-5p	up	1.38	0.00224914	NA
hsa-miR-205-5p	up	1.38	0.00269563	NA
hsa-miR-18b-5p	up	1.38	0.00243263	NA
hsa-miR-152-3p	up	1.38	0.00245877	NA
hsa-miR-149-5p	up	1.38	0.00233969	NA
hsa-miR-140-5p	up	1.38	0.00243263	NA
hsa-miR-126-3p	up	1.38	0.00249186	NA
hsa-miR-876-3p	up	1.36	0.00472908	NA
hsa-miR-532-5p	up	1.36	0.00223495	NA
hsa-miR-24-3p	up	1.36	0.00202906	NA
hsa-miR-22-5p	up	1.36	0.00261351	NA
hsa-miR-205-3p	up	1.36	0.00272133	NA
hsa-miR-30a-5p	up	1.35	0.00357077	NA
hsa-miR-191-5p	up	1.35	0.00237136	NA
hsa-miR-873-5p	up	1.34	0.00351423	NA
hsa-miR-34a-5p	up	1.34	0.00258312	NA
hsa-miR-320a	up	1.34	0.00805421	NA
hsa-miR-30e-5p	up	1.34	0.00357077	NA
hsa-miR-183-5p	up	1.34	0.00266562	NA
hsa-miR-141-5p	up	1.34	0.00289285	NA
hsa-miR-577	up	1.33	0.0219307	NA
hsa-miR-429	up	1.33	0.0035981	NA
hsa-miR-17-5p	up	1.33	0.00357077	NA
hsa-miR-106b-3p	up	1.33	0.00322593	NA
hsa-miR-6794-5p	up	1.32	0.00190746	NA
hsa-miR-502-3p	up	1.32	0.00330732	NA
hsa-miR-27b-5p	up	1.32	0.00761437	NA
hsa-miR-19a-3p	up	1.32	0.00525585	NA
hsa-miR-198	up	1.32	0.0155418	NA
hsa-miR-101-3p	up	1.32	0.00567233	NA
hsa-miR-629-5p	up	1.31	0.00626554	NA
hsa-miR-4429	up	1.31	0.00603166	NA
hsa-miR-185-5p	up	1.31	0.00363375	NA
hsa-miR-151a-3p	up	1.31	0.00363375	NA
hsa-miR-93-5p	up	1.3	0.00399531	NA
hsa-miR-744-5p	up	1.3	0.00844748	NA
hsa-miR-598-3p	up	1.3	0.00362935	NA
hsa-miR-106a-5p	up	1.3	0.00351423	NA
hsa-miR-20a-5p	up	1.29	0.00464615	NA
hsa-miR-193b-3p	up	1.29	0.00357077	NA
hsa-miR-362-3p	up	1.28	0.00422328	NA
hsa-miR-342-3p	up	1.28	0.0035981	NA
hsa-miR-222-3p	up	1.28	0.00528855	NA
hsa-miR-19b-3p	up	1.28	0.0044373	NA
hsa-miR-193a-3p	up	1.28	0.00333005	NA
hsa-miR-660-5p	up	1.27	0.00468395	NA
hsa-miR-500a-5p	up	1.27	0.00433315	NA
hsa-miR-324-5p	up	1.27	0.00426802	NA
hsa-miR-128-3p	up	1.27	0.00422328	NA
hsa-miR-876-5p	up	1.26	0.00938169	NA
hsa-miR-320d	up	1.26	0.00713665	NA
hsa-miR-320b	up	1.26	0.00766184	NA
hsa-miR-221-3p	up	1.26	0.00486333	NA
hsa-miR-21-3p	up	1.26	0.0037525	NA
hsa-miR-491-5p	up	1.25	0.00713665	NA
hsa-miR-320e	up	1.25	0.00887967	NA
hsa-miR-320c	up	1.25	0.00844748	NA
hsa-miR-25-3p	up	1.25	0.00539291	NA
hsa-miR-590-5p	up	1.23	0.00663618	NA
hsa-miR-3687	up	1.23	0.01157	NA
hsa-let-7f-2-3p	up	1.23	0.0220634	NA
hsa-let-7a-3p	up	1.23	0.0197903	NA
hsa-miR-584-5p	up	1.22	0.00715306	NA
hsa-miR-449a	up	1.22	0.0274968	NA
hsa-miR-361-5p	up	1.22	0.00468395	NA
hsa-miR-22-3p	up	1.22	0.00846488	NA
hsa-miR-148b-3p	up	1.22	0.00481626	NA
hsa-miR-505-3p	up	1.21	0.00527954	NA
hsa-miR-20b-5p	up	1.2	0.00673276	NA
hsa-miR-16-5p	up	1.2	0.00942107	NA
hsa-miR-130a-3p	up	1.2	0.00893876	NA
hsa-miR-500b-5p	up	1.19	0.0112012	NA
hsa-miR-92a-3p	up	1.18	0.00761437	NA
hsa-miR-920	up	1.18	0.0277779	NA
hsa-miR-501-3p	up	1.18	0.00918296	NA
hsa-miR-484	up	1.18	0.00430003	NA
hsa-miR-324-3p	up	1.18	0.00783789	NA
hsa-miR-19b-1-5p	up	1.18	0.00797649	NA
hsa-miR-130b-3p	up	1.18	0.0215358	NA
hsa-miR-126-5p	up	1.18	0.00952314	NA
hsa-miR-500a-3p	up	1.17	0.0206571	NA
hsa-miR-4449	up	1.17	0.0076132	NA
hsa-miR-4306	up	1.17	0.00856191	NA
hsa-miR-377-3p	up	1.17	0.0099177	NA
hsa-miR-218-5p	up	1.17	0.00990005	NA
hsa-miR-200b-5p	up	1.17	0.00990005	NA
hsa-miR-181a-3p	up	1.17	0.0176108	NA
hsa-miR-92b-3p	up	1.16	0.008511	NA
hsa-miR-378h	up	1.16	0.0176108	NA
hsa-miR-365a-3p	up	1.16	0.00942107	NA
hsa-miR-6837-5p	up	1.15	0.0180413	NA
hsa-miR-425-3p	up	1.15	0.0115348	NA
hsa-miR-186-5p	up	1.14	0.00938169	NA
hsa-miR-15b-3p	up	1.14	0.0101024	NA
hsa-miR-589-3p	up	1.13	0.0154247	NA
hsa-miR-502-5p	up	1.13	0.0212977	NA
hsa-miR-181c-3p	up	1.13	0.0277654	NA
hsa-miR-1290	up	1.13	0.0193914	NA
hsa-miR-7-1-3p	up	1.12	0.00666439	NA
hsa-miR-564	up	1.12	0.0238415	NA
hsa-miR-3609	up	1.12	0.0290647	NA
hsa-miR-1537-3p	up	1.12	0.0298335	NA
hsa-miR-1291	up	1.12	0.0176398	NA
hsa-miR-4664-5p	up	1.11	0.0145274	NA
hsa-miR-23b-5p	up	1.11	0.0286199	NA
hsa-miR-331-5p	up	1.1	0.0117589	NA
hsa-miR-330-5p	up	1.1	0.0166082	NA
hsa-miR-29a-3p	up	1.1	0.0124897	NA
hsa-miR-296-5p	up	1.1	0.0109109	NA
hsa-miR-873-3p	up	1.09	0.0219307	NA
hsa-miR-188-5p	up	1.08	0.0115348	NA
hsa-miR-664a-3p	up	1.07	0.0204885	NA
hsa-miR-2110	up	1.07	0.0186622	NA
hsa-miR-3126-5p	up	1.06	0.0307665	NA
hsa-miR-1249	up	1.06	0.0117589	hsa-miR-1249-3p
hsa-miR-579-3p	up	1.05	0.0356119	NA
hsa-miR-146b-5p	up	1.05	0.00782772	NA
hsa-miR-125a-3p	up	1.05	0.0133676	NA
hsa-miR-103a-2-5p	up	1.05	0.0177338	NA
hsa-miR-6088	up	1.04	0.0305018	NA
hsa-miR-542-3p	up	1.04	0.0238415	NA
hsa-miR-18a-3p	up	1.04	0.0108917	NA
hsa-miR-505-5p	up	1.03	0.0395098	NA
hsa-miR-34b-5p	up	1.03	0.0134545	NA
hsa-miR-671-5p	up	1.02	0.0177338	NA
hsa-miR-424-5p	up	1.02	0.0217963	NA
hsa-miR-125a-5p	up	1.02	0.0176398	NA
hsa-miR-345-5p	up	1.01	0.019075	NA
hsa-miR-1236-5p	up	1.01	0.0303523	NA
hsa-miR-3607-5p	up	1	0.0330476	NA
hsa-miR-149-3p	up	1	0.0214171	NA
hsa-miR-1296-5p	up	0.98	0.0197431	NA
hsa-miR-1225-5p	up	0.98	0.0355418	NA
hsa-miR-664b-3p	up	0.97	0.0300246	NA
hsa-miR-503-5p	up	0.97	0.0173665	NA
hsa-miR-421	up	0.97	0.0269076	NA
hsa-miR-340-5p	up	0.96	0.031453	NA
hsa-miR-193a-5p	up	0.96	0.0262761	NA
hsa-miR-664b-5p	up	0.93	0.0335677	NA
hsa-miR-193b-5p	up	0.93	0.027753	NA
hsa-miR-589-5p	up	0.92	0.0394572	NA
hsa-miR-1914-3p	up	0.92	0.0351627	NA
hsa-miR-1307-3p	up	0.9	0.0372819	NA
hsa-miR-211-3p	up	0.89	0.0470226	NA
hsa-miR-132-3p	up	0.89	0.0403442	NA
hsa-miR-4646-5p	up	0.88	0.0439528	NA
hsa-let-7d-3p	up	0.87	0.0443419	NA
hsa-miR-132-5p	up	0.85	0.0333068	NA
hsa-miR-139-5p	up	0.82	0.0423415	NA
hsa-miR-339-5p	up	0.81	0.0392722	NA
hsa-miR-532-3p	up	0.8	0.0434885	NA
hsa-miR-6165	down	-0.82	0.0381417	NA
hsa-miR-494-3p	down	-0.83	0.0469764	NA
hsa-miR-574-3p	down	-0.87	0.0280415	NA
hsa-miR-548az-5p	down	-0.88	0.0448989	NA
hsa-miR-1255b-2-3p	down	-0.9	0.0305071	NA
hsa-miR-1254	down	-0.9	0.0334208	NA
hsa-miR-548w	down	-0.92	0.0268615	NA
hsa-miR-4687-3p	down	-0.92	0.0214276	NA
hsa-miR-2116-3p	down	-0.93	0.0277654	NA
hsa-miR-5739	down	-0.96	0.0251012	NA
hsa-miR-1343-5p	down	-0.96	0.0493731	NA
hsa-miR-616-3p	down	-0.97	0.0330239	NA
hsa-miR-4447	down	-0.97	0.0462593	NA
hsa-miR-6836-5p	down	-0.98	0.026767	NA
hsa-miR-4758-5p	down	-0.98	0.0207756	NA
hsa-miR-649	down	-0.99	0.0193051	NA
hsa-miR-4446-3p	down	-0.99	0.020471	NA
hsa-miR-1273e	down	-0.99	0.020743	NA
hsa-miR-1303	down	-1.02	0.0187328	NA
hsa-miR-6799-3p	down	-1.04	0.0210711	NA
hsa-miR-548ay-5p	down	-1.04	0.0128779	NA
hsa-miR-548ae	down	-1.04	0.0286199	hsa-miR-548ae-3p
hsa-miR-548e-5p	down	-1.05	0.00942107	NA
hsa-miR-1267	down	-1.06	0.0276446	NA
hsa-miR-6781-5p	down	-1.07	0.0314929	NA
hsa-miR-378j	down	-1.07	0.0499198	NA
hsa-miR-1273c	down	-1.07	0.00809914	NA
hsa-miR-1244	down	-1.07	0.0432761	NA
hsa-miR-466	down	-1.08	0.0312641	NA
hsa-miR-6806-5p	down	-1.09	0.0373943	NA
hsa-miR-6829-5p	down	-1.1	0.010631	NA
hsa-miR-3147	down	-1.11	0.0133944	NA
hsa-miR-6768-5p	down	-1.12	0.0186622	NA
hsa-miR-5694	down	-1.12	0.0269397	NA
hsa-miR-3135a	down	-1.13	0.00654946	NA
hsa-miR-7156-3p	down	-1.15	0.015996	NA
hsa-miR-4656	down	-1.16	0.00673276	NA
hsa-miR-326	down	-1.16	0.0270304	NA
hsa-miR-1304-3p	down	-1.16	0.00918794	NA
hsa-miR-1289	down	-1.16	0.0165756	NA
hsa-miR-548aw	down	-1.17	0.0206571	NA
hsa-miR-3934-3p	down	-1.17	0.0176758	NA
hsa-miR-3674	down	-1.17	0.0216112	NA
hsa-miR-1237-3p	down	-1.17	0.00893876	NA
hsa-miR-5001-3p	down	-1.19	0.026031	NA
hsa-miR-4746-5p	down	-1.19	0.0193914	NA
hsa-miR-760	down	-1.2	0.00870025	NA
hsa-miR-548h-5p	down	-1.21	0.00783789	NA
hsa-miR-4433b-5p	down	-1.21	0.00567233	NA
hsa-miR-6775-5p	down	-1.22	0.00335958	NA
hsa-miR-3191-3p	down	-1.22	0.0323723	NA
hsa-miR-7114-5p	down	-1.23	0.0198156	NA
hsa-miR-6820-3p	down	-1.23	0.0203454	NA
hsa-miR-2115-3p	down	-1.23	0.0412185	NA
hsa-miR-8071	down	-1.24	0.00649741	NA
hsa-miR-548b-5p	down	-1.25	0.00464615	NA
hsa-miR-1285-5p	down	-1.25	0.00384995	NA
hsa-miR-297	down	-1.26	0.0035981	NA
hsa-miR-6787-5p	down	-1.27	0.0104463	NA
hsa-miR-5585-3p	down	-1.27	0.00357077	NA
hsa-miR-548ak	down	-1.27	0.0163445	NA
hsa-miR-4515	down	-1.27	0.0095578	NA
hsa-miR-6789-5p	down	-1.28	0.00738005	NA
hsa-miR-6765-5p	down	-1.28	0.00335347	NA
hsa-miR-1273a	down	-1.28	0.00306848	NA
hsa-miR-6736-3p	down	-1.29	0.0115348	NA
hsa-miR-646	down	-1.29	0.0399893	NA
hsa-miR-6124	down	-1.29	0.00258312	NA
hsa-miR-5196-5p	down	-1.29	0.00231946	NA
hsa-miR-4519	down	-1.29	0.00871196	NA
hsa-miR-4675	down	-1.3	0.0182871	NA
hsa-miR-6769b-3p	down	-1.31	0.00764249	NA
hsa-miR-4507	down	-1.31	0.00510668	NA
hsa-miR-937-3p	down	-1.32	0.0138519	NA
hsa-miR-6848-5p	down	-1.32	0.00422328	NA
hsa-miR-6795-3p	down	-1.32	0.00607348	NA
hsa-miR-4690-5p	down	-1.32	0.00194404	NA
hsa-miR-3192-3p	down	-1.32	0.0118991	NA
hsa-miR-4655-3p	down	-1.34	0.017565	NA
hsa-miR-4502	down	-1.34	0.0035981	NA
hsa-miR-4472	down	-1.34	0.00945007	NA
hsa-miR-4327	down	-1.34	0.0102836	NA
hsa-miR-3155a	down	-1.34	0.0204018	NA
hsa-miR-6791-5p	down	-1.35	0.00167073	NA
hsa-miR-6895-5p	down	-1.36	0.00422328	NA
hsa-miR-5698	down	-1.36	0.0252467	NA
hsa-miR-4707-3p	down	-1.36	0.00422328	NA
hsa-miR-4664-3p	down	-1.36	0.0333068	NA
hsa-miR-1227-3p	down	-1.36	0.00363375	NA
hsa-miR-1224-5p	down	-1.37	0.00436202	NA
hsa-miR-6784-5p	down	-1.38	0.00258312	NA
hsa-miR-6772-5p	down	-1.39	0.00380029	NA
hsa-miR-6728-5p	down	-1.39	0.0263628	NA
hsa-miR-6723-5p	down	-1.39	0.0463869	NA
hsa-miR-4721	down	-1.39	0.00654946	NA
hsa-miR-4660	down	-1.39	0.0162576	NA
hsa-miR-6892-3p	down	-1.41	0.00207689	NA
hsa-miR-6779-5p	down	-1.42	0.00265349	NA
hsa-miR-4722-5p	down	-1.42	0.00339518	NA
hsa-miR-449b-3p	down	-1.42	0.00409267	NA
hsa-miR-3614-5p	down	-1.42	0.012732	NA
hsa-miR-146a-3p	down	-1.42	0.00848925	NA
hsa-miR-6827-5p	down	-1.43	0.00339518	NA
hsa-miR-764	down	-1.44	0.00478652	NA
hsa-miR-3917	down	-1.44	0.00624992	NA
hsa-miR-192-3p	down	-1.44	0.0203454	NA
hsa-miR-1322	down	-1.44	0.00260498	NA
hsa-miR-6801-3p	down	-1.45	0.00335958	NA
hsa-miR-4538	down	-1.46	0.00301956	NA
hsa-miR-4793-3p	down	-1.47	0.00547433	NA
hsa-miR-6778-3p	down	-1.48	0.0219307	NA
hsa-miR-566	down	-1.49	0.00120551	NA
hsa-miR-519d-3p	down	-1.49	0.0388602	NA
hsa-miR-8069	down	-1.5	0.00579493	NA
hsa-miR-3661	down	-1.5	0.00918296	NA
hsa-miR-6809-3p	down	-1.51	0.00937208	NA
hsa-miR-4512	down	-1.51	0.00156201	NA
hsa-miR-4756-5p	down	-1.52	0.038122	NA
hsa-miR-5189-5p	down	-1.53	0.00262889	NA
hsa-miR-4649-5p	down	-1.53	0.00381283	NA
hsa-miR-6734-3p	down	-1.54	0.00335958	NA
hsa-miR-615-3p	down	-1.54	0.0112012	NA
hsa-miR-6871-5p	down	-1.55	0.0193051	NA
hsa-miR-6843-3p	down	-1.55	0.0217963	NA
hsa-miR-608	down	-1.55	0.0270304	NA
hsa-miR-3655	down	-1.55	0.00939262	NA
hsa-miR-6722-3p	down	-1.56	0.00125912	NA
hsa-miR-7113-5p	down	-1.57	0.0193914	NA
hsa-miR-6840-3p	down	-1.57	0.00293186	NA
hsa-miR-4304	down	-1.57	0.00539291	NA
hsa-miR-6807-3p	down	-1.58	0.00151913	NA
hsa-miR-6797-3p	down	-1.58	0.00615242	NA
hsa-miR-3155b	down	-1.58	0.00467132	NA
hsa-miR-3150b-5p	down	-1.59	0.0169001	NA
hsa-miR-6751-3p	down	-1.6	0.0139264	NA
hsa-miR-657	down	-1.6	0.0177226	NA
hsa-miR-1250-5p	down	-1.6	0.014748	NA
hsa-miR-7843-5p	down	-1.61	0.0104707	NA
hsa-miR-7114-3p	down	-1.61	0.00101153	NA
hsa-miR-1915-3p	down	-1.61	0.000731338	NA
hsa-miR-1200	down	-1.61	0.0157758	NA
hsa-miR-4701-5p	down	-1.62	0.0054525	NA
hsa-miR-1910-5p	down	-1.62	0.00183195	NA
hsa-miR-4268	down	-1.63	0.0204195	NA
hsa-miR-3187-5p	down	-1.63	0.00199787	NA
hsa-miR-6751-5p	down	-1.64	0.00243263	NA
hsa-miR-504-3p	down	-1.65	0.00216554	NA
hsa-miR-3189-3p	down	-1.65	0.0265407	NA
hsa-miR-4733-3p	down	-1.66	0.0238665	NA
hsa-miR-6845-5p	down	-1.67	0.00357077	NA
hsa-miR-5572	down	-1.67	0.00422328	NA
hsa-miR-450a-2-3p	down	-1.67	0.0335517	NA
hsa-miR-6861-3p	down	-1.68	0.00942107	NA
hsa-miR-4695-3p	down	-1.68	0.0030436	NA
hsa-miR-4267	down	-1.7	0.0191894	NA
hsa-miR-2682-3p	down	-1.71	0.00392847	NA
hsa-miR-6803-3p	down	-1.72	0.000864859	NA
hsa-miR-6783-3p	down	-1.72	0.0288403	NA
hsa-miR-7703	down	-1.74	0.0133944	NA
hsa-miR-4494	down	-1.74	0.00832447	NA
hsa-miR-6852-5p	down	-1.75	0.00592812	NA
hsa-miR-214-5p	down	-1.75	0.0205668	NA
hsa-miR-138-1-3p	down	-1.75	0.00667156	NA
hsa-miR-6796-5p	down	-1.76	0.00173178	NA
hsa-miR-3692-5p	down	-1.76	0.0122931	NA
hsa-miR-767-5p	down	-1.77	0.0230024	NA
hsa-miR-593-5p	down	-1.77	0.00728224	NA
hsa-miR-548ay-3p	down	-1.77	0.00187639	NA
hsa-miR-4727-5p	down	-1.77	0.0199679	NA
hsa-miR-4649-3p	down	-1.77	0.00211662	NA
hsa-miR-136-3p	down	-1.77	0.0284406	NA
hsa-miR-6761-3p	down	-1.78	0.00243263	NA
hsa-miR-4747-3p	down	-1.78	0.00561246	NA
hsa-miR-4296	down	-1.78	0.0139835	NA
hsa-miR-3675-3p	down	-1.78	0.00243263	NA
hsa-miR-1247-5p	down	-1.78	0.00539291	NA
hsa-miR-766-3p	down	-1.79	0.000986923	NA
hsa-miR-6742-5p	down	-1.79	0.0435559	NA
hsa-miR-487a-5p	down	-1.79	0.0110755	NA
hsa-miR-4730	down	-1.79	0.0321021	NA
hsa-miR-370-5p	down	-1.79	0.0377639	NA
hsa-miR-6891-3p	down	-1.8	0.00672996	NA
hsa-miR-6815-3p	down	-1.8	0.00335958	NA
hsa-miR-6793-5p	down	-1.8	0.00278266	NA
hsa-miR-4750-5p	down	-1.81	0.00110264	NA
hsa-miR-4498	down	-1.81	0.000731338	NA
hsa-miR-1202	down	-1.81	0.000731338	NA
hsa-miR-758-5p	down	-1.82	0.0174656	NA
hsa-miR-647	down	-1.83	0.00380029	NA
hsa-miR-3127-3p	down	-1.83	0.000876851	NA
hsa-miR-1178-5p	down	-1.83	0.0330476	NA
hsa-miR-631	down	-1.84	0.00112622	NA
hsa-miR-4661-5p	down	-1.84	0.0335517	NA
hsa-miR-4658	down	-1.84	0.0351989	NA
hsa-miR-1587	down	-1.84	0.000815657	NA
hsa-miR-6767-5p	down	-1.85	0.00737484	NA
hsa-miR-4421	down	-1.85	0.00201387	NA
hsa-miR-4326	down	-1.85	0.0489111	NA
hsa-miR-3186-5p	down	-1.85	0.0192175	NA
hsa-miR-943	down	-1.86	0.00488958	NA
hsa-miR-7160-3p	down	-1.86	0.0208113	NA
hsa-miR-6841-3p	down	-1.86	0.00564679	NA
hsa-miR-4654	down	-1.86	0.001337	NA
hsa-miR-7154-5p	down	-1.88	0.0434885	NA
hsa-miR-6794-3p	down	-1.88	0.00131816	NA
hsa-miR-6779-3p	down	-1.88	0.00489048	NA
hsa-miR-6776-3p	down	-1.88	0.000901929	NA
hsa-miR-6747-3p	down	-1.88	0.000975412	NA
hsa-miR-4297	down	-1.88	0.0183486	NA
hsa-miR-4290	down	-1.88	0.00261351	NA
hsa-miR-875-3p	down	-1.89	0.0310617	NA
hsa-miR-4518	down	-1.89	0.0462593	NA
hsa-miR-7111-3p	down	-1.9	0.00133093	NA
hsa-miR-5088-3p	down	-1.9	0.00137638	NA
hsa-miR-4732-3p	down	-1.9	0.00096574	NA
hsa-miR-6825-3p	down	-1.91	0.000864958	NA
hsa-miR-6500-3p	down	-1.91	0.00709289	NA
hsa-miR-6075	down	-1.91	0.00208002	NA
hsa-miR-6813-3p	down	-1.92	0.000700734	NA
hsa-miR-6760-3p	down	-1.92	0.000975412	NA
hsa-miR-6790-5p	down	-1.93	0.00614403	NA
hsa-miR-4722-3p	down	-1.93	0.00071674	NA
hsa-miR-4252	down	-1.93	0.000927773	NA
hsa-miR-4786-3p	down	-1.94	0.0279867	NA
hsa-miR-6738-3p	down	-1.95	0.00152391	NA
hsa-miR-6085	down	-1.95	0.00299394	NA
hsa-miR-4470	down	-1.95	0.00592812	NA
hsa-miR-1976	down	-1.95	0.000867801	NA
hsa-miR-1539	down	-1.95	0.001337	NA
hsa-miR-6737-5p	down	-1.96	0.00132179	NA
hsa-miR-4762-5p	down	-1.96	0.0205555	NA
hsa-miR-4667-3p	down	-1.96	0.00102722	NA
hsa-miR-4640-3p	down	-1.96	0.000683223	NA
hsa-miR-146b-3p	down	-1.96	0.00143322	NA
hsa-miR-6791-3p	down	-1.97	0.0242285	NA
hsa-miR-6785-3p	down	-1.97	0.000593996	NA
hsa-miR-3907	down	-1.97	0.00190746	NA
hsa-miR-346	down	-1.97	0.000963642	NA
hsa-miR-1229-3p	down	-1.97	0.000700734	NA
hsa-miR-6855-3p	down	-1.98	0.0277779	NA
hsa-miR-6078	down	-1.98	0.00380029	NA
hsa-miR-4537	down	-1.98	0.00193794	NA
hsa-miR-1324	down	-1.98	0.00335958	NA
hsa-miR-7162-5p	down	-1.99	0.00313285	NA
hsa-miR-6501-5p	down	-1.99	0.0293917	NA
hsa-miR-4769-3p	down	-1.99	0.00121327	NA
hsa-miR-370-3p	down	-1.99	0.00112622	NA
hsa-miR-196a-3p	down	-1.99	0.00134852	NA
hsa-miR-8077	down	-2	0.0136695	NA
hsa-miR-6890-3p	down	-2	0.00121327	NA
hsa-miR-6876-3p	down	-2	0.00333231	NA
hsa-miR-554	down	-2	0.00356943	NA
hsa-miR-4477a	down	-2	0.0038898	NA
hsa-miR-6741-3p	down	-2.01	0.00202546	NA
hsa-miR-1914-5p	down	-2.01	0.000418034	NA
hsa-miR-7850-5p	down	-2.03	0.00410942	NA
hsa-miR-487b-5p	down	-2.03	0.0101024	NA
hsa-miR-4269	down	-2.03	0.00150363	NA
hsa-miR-3118	down	-2.03	0.00273698	NA
hsa-miR-6737-3p	down	-2.04	0.00380201	NA
hsa-miR-1909-5p	down	-2.04	0.000640358	NA
hsa-miR-1263	down	-2.06	0.0419532	NA
hsa-miR-6827-3p	down	-2.07	0.00680069	NA
hsa-miR-6796-3p	down	-2.07	0.000927773	NA
hsa-miR-6854-5p	down	-2.08	0.0130287	NA
hsa-miR-6514-3p	down	-2.08	0.00108697	NA
hsa-miR-4302	down	-2.08	0.00173178	NA
hsa-miR-6715b-3p	down	-2.09	0.0414897	NA
hsa-miR-6506-3p	down	-2.09	0.0169001	NA
hsa-miR-5589-5p	down	-2.09	0.00224914	NA
hsa-miR-4641	down	-2.09	0.0351855	NA
hsa-miR-6762-3p	down	-2.1	0.00146385	NA
hsa-miR-1471	down	-2.1	0.00096574	NA
hsa-miR-4726-3p	down	-2.11	0.00143322	NA
hsa-miR-1913	down	-2.11	0.000447385	NA
hsa-miR-6882-3p	down	-2.12	0.000588104	NA
hsa-miR-6511a-3p	down	-2.12	0.000484071	NA
hsa-miR-5571-5p	down	-2.14	0.0197431	NA
hsa-miR-1911-3p	down	-2.14	0.00663618	NA
hsa-miR-1301-5p	down	-2.14	0.00244456	NA
hsa-miR-503-3p	down	-2.15	0.0052425	NA
hsa-miR-4725-5p	down	-2.15	0.000411747	NA
hsa-miR-3177-5p	down	-2.15	0.00662762	NA
hsa-miR-6511b-3p	down	-2.16	0.000456158	NA
hsa-miR-329-5p	down	-2.16	0.00333231	NA
hsa-miR-1225-3p	down	-2.16	0.000277	NA
hsa-miR-345-3p	down	-2.17	0.00132179	NA
hsa-miR-6889-3p	down	-2.18	0.00243263	NA
hsa-miR-2278	down	-2.18	0.000640358	NA
hsa-miR-153-5p	down	-2.18	0.0173665	NA
hsa-miR-1184	down	-2.18	0.00279184	NA
hsa-miR-7106-3p	down	-2.19	0.000345306	NA
hsa-miR-6837-3p	down	-2.19	0.00211662	NA
hsa-miR-6753-3p	down	-2.19	0.00183195	NA
hsa-miR-4305	down	-2.19	0.039451	NA
hsa-miR-3660	down	-2.19	0.0434885	NA
hsa-miR-6819-3p	down	-2.21	0.000277	NA
hsa-miR-4639-5p	down	-2.21	0.0191675	NA
hsa-miR-4484	down	-2.21	0.000851123	NA
hsa-miR-1915-5p	down	-2.22	0.000605046	NA
hsa-miR-1233-3p	down	-2.22	0.00040318	NA
hsa-miR-4731-3p	down	-2.23	0.0193113	NA
hsa-miR-3680-5p	down	-2.23	0.00183195	NA
hsa-miR-1228-3p	down	-2.23	0.000323908	NA
hsa-miR-6787-3p	down	-2.24	0.000864859	NA
hsa-miR-5571-3p	down	-2.24	0.00244456	NA
hsa-miR-3689a-5p	down	-2.24	0.0111675	NA
hsa-miR-6800-3p	down	-2.25	0.000364861	NA
hsa-miR-6744-3p	down	-2.25	0.000851123	NA
hsa-miR-6822-3p	down	-2.26	0.00422328	NA
hsa-miR-6736-5p	down	-2.26	0.000683223	NA
hsa-miR-490-5p	down	-2.26	0.0102836	NA
hsa-miR-5190	down	-2.27	0.000361313	NA
hsa-miR-495-5p	down	-2.27	0.047	NA
hsa-miR-6750-3p	down	-2.28	0.000521398	NA
hsa-miR-3619-3p	down	-2.28	0.00059121	NA
hsa-miR-6780b-3p	down	-2.3	0.00357077	NA
hsa-miR-5196-3p	down	-2.3	0.00224914	NA
hsa-miR-4728-3p	down	-2.3	0.000323908	NA
hsa-miR-4520a-5p	down	-2.3	0.00520516	hsa-miR-4520-5p
hsa-miR-539-5p	down	-2.31	0.0272523	NA
hsa-miR-6729-3p	down	-2.32	0.000323908	NA
hsa-miR-604	down	-2.32	0.0177338	NA
hsa-miR-6848-3p	down	-2.33	0.000700734	NA
hsa-miR-4734	down	-2.33	0.000228909	NA
hsa-miR-1269a	down	-2.33	0.000901929	NA
hsa-miR-595	down	-2.34	0.00117563	NA
hsa-miR-194-3p	down	-2.34	0.001337	NA
hsa-miR-1236-3p	down	-2.34	0.00196147	NA
hsa-miR-6810-3p	down	-2.35	0.000277	NA
hsa-miR-593-3p	down	-2.36	0.00810476	NA
hsa-miR-1288-3p	down	-2.36	0.00539291	NA
hsa-miR-3927-5p	down	-2.37	0.0464602	NA
hsa-miR-1251-3p	down	-2.37	0.00320674	NA
hsa-miR-5589-3p	down	-2.38	0.000679129	NA
hsa-miR-4652-3p	down	-2.39	0.0224813	NA
hsa-miR-521	down	-2.41	0.0303523	NA
hsa-miR-4312	down	-2.42	0.000458909	NA
hsa-miR-3677-5p	down	-2.42	0.00117563	NA
hsa-miR-6775-3p	down	-2.43	0.000249119	NA
hsa-miR-5587-3p	down	-2.43	0.00151913	NA
hsa-miR-6782-3p	down	-2.45	0.000514339	NA
hsa-miR-376b-5p	down	-2.45	0.0358342	NA
hsa-miR-6884-3p	down	-2.47	0.000304666	NA
hsa-miR-6792-3p	down	-2.47	0.000323908	NA
hsa-miR-517-5p	down	-2.47	0.00529415	NA
hsa-miR-4723-3p	down	-2.47	0.000456158	NA
hsa-miR-6862-3p	down	-2.48	0.000249502	NA
hsa-miR-6878-3p	down	-2.49	0.00132179	NA
hsa-miR-6851-3p	down	-2.5	0.000654288	NA
hsa-miR-5002-3p	down	-2.5	0.00190746	NA
hsa-miR-4690-3p	down	-2.5	0.000323908	NA
hsa-miR-7160-5p	down	-2.51	0.000451259	NA
hsa-miR-6811-3p	down	-2.51	0.00035335	NA
hsa-miR-6804-3p	down	-2.53	0.000240156	NA
hsa-miR-6500-5p	down	-2.53	0.00529591	NA
hsa-miR-1231	down	-2.54	0.000277	NA
hsa-miR-892b	down	-2.55	0.0035981	NA
hsa-miR-6877-3p	down	-2.55	0.000249502	NA
hsa-miR-6788-3p	down	-2.55	0.000277	NA
hsa-miR-210-5p	down	-2.55	0.000228909	NA
hsa-miR-6503-5p	down	-2.57	0.0440799	NA
hsa-miR-5685	down	-2.57	0.0286583	NA
hsa-miR-6872-3p	down	-2.58	0.000228909	NA
hsa-miR-6759-3p	down	-2.58	0.000975412	NA
hsa-miR-5693	down	-2.58	0.0227016	NA
hsa-miR-662	down	-2.6	0.00202546	NA
hsa-miR-5189-3p	down	-2.61	0.00096574	NA
hsa-miR-33b-3p	down	-2.61	0.000277	NA
hsa-miR-770-5p	down	-2.63	0.00607348	NA
hsa-miR-4691-5p	down	-2.63	0.000411747	NA
hsa-miR-548g-3p	down	-2.64	0.00819892	NA
hsa-miR-572	down	-2.65	0.000456158	NA
hsa-miR-1208	down	-2.65	0.0433376	NA
hsa-miR-6728-3p	down	-2.66	0.000323908	NA
hsa-miR-6506-5p	down	-2.66	0.00265349	NA
hsa-miR-4293	down	-2.66	0.00243263	NA
hsa-miR-380-5p	down	-2.66	0.0419532	NA
hsa-miR-637	down	-2.67	0.000927773	NA
hsa-miR-6886-3p	down	-2.68	0.000277	NA
hsa-miR-219b-3p	down	-2.68	0.00301956	NA
hsa-miR-143-5p	down	-2.69	0.000458909	NA
hsa-miR-7109-3p	down	-2.7	0.000406763	NA
hsa-miR-4274	down	-2.7	0.000228909	NA
hsa-miR-6770-3p	down	-2.71	0.00567233	NA
hsa-miR-4322	down	-2.71	0.000269212	NA
hsa-miR-134-3p	down	-2.72	0.00267928	NA
hsa-miR-557	down	-2.73	0.000876851	NA
hsa-miR-4726-5p	down	-2.73	0.000167569	NA
hsa-miR-1250-3p	down	-2.73	0.00150363	NA
hsa-miR-6767-3p	down	-2.74	0.000984135	NA
hsa-miR-6893-3p	down	-2.76	0.000240156	NA
hsa-miR-3197	down	-2.77	0.000166071	NA
hsa-miR-6855-5p	down	-2.78	0.0101024	NA
hsa-miR-668-3p	down	-2.78	0.00156201	NA
hsa-miR-6772-3p	down	-2.79	0.00143322	NA
hsa-miR-323a-5p	down	-2.81	0.00117563	NA
hsa-miR-6849-3p	down	-2.82	0.000249119	NA
hsa-miR-5705	down	-2.82	0.00222919	NA
hsa-miR-488-5p	down	-2.82	0.00143322	NA
hsa-miR-6830-3p	down	-2.83	0.00190746	NA
hsa-miR-6735-3p	down	-2.83	0.000277	NA
hsa-miR-3689d	down	-2.84	0.00627561	NA
hsa-miR-3690	down	-2.86	0.00243263	NA
hsa-miR-138-2-3p	down	-2.86	0.0313216	NA
hsa-miR-1282	down	-2.86	0.00132179	NA
hsa-miR-5188	down	-2.87	0.0058928	NA
hsa-miR-4763-3p	down	-2.87	0.000147601	NA
hsa-miR-3620-3p	down	-2.87	0.000228909	NA
hsa-miR-124-5p	down	-2.87	0.000683223	NA
hsa-miR-4453	down	-2.91	0.00195641	NA
hsa-miR-1238-5p	down	-2.91	0.000277	NA
hsa-miR-6870-5p	down	-2.92	0.000277	NA
hsa-miR-635	down	-2.93	0.0427919	NA
hsa-miR-6726-3p	down	-2.96	0.000228909	NA
hsa-miR-4743-3p	down	-2.96	0.0193914	NA
hsa-miR-4483	down	-2.96	0.001337	NA
hsa-miR-675-3p	down	-2.99	0.00121327	NA
hsa-miR-4265	down	-2.99	0.000288536	NA
hsa-miR-3689a-3p	down	-2.99	0.000683223	NA
hsa-miR-5004-3p	down	-3	0.000608508	NA
hsa-miR-4639-3p	down	-3.03	0.00282362	NA
hsa-miR-4539	down	-3.03	0.000172384	NA
hsa-miR-1178-3p	down	-3.03	0.00873457	NA
hsa-miR-452-3p	down	-3.05	0.0206087	NA
hsa-miR-4456	down	-3.05	0.0125366	NA
hsa-miR-3689f	down	-3.08	0.00150349	NA
hsa-miR-4292	down	-3.09	0.000188476	NA
hsa-miR-4632-3p	down	-3.1	0.000277	NA
hsa-miR-4663	down	-3.11	0.000593996	NA
hsa-miR-3663-5p	down	-3.13	0.000166071	NA
hsa-miR-6859-3p	down	-3.16	0.000411747	NA
hsa-miR-6769a-3p	down	-3.18	0.000249502	NA
hsa-miR-6754-3p	down	-3.22	0.000328048	NA
hsa-miR-1538	down	-3.23	0.000188476	NA
hsa-miR-7974	down	-3.24	0.000620756	NA
hsa-miR-323b-5p	down	-3.24	0.00163016	NA
hsa-miR-661	down	-3.27	0.000249119	NA
hsa-miR-508-5p	down	-3.27	0.0403129	NA
hsa-miR-432-3p	down	-3.27	0.000864958	NA
hsa-miR-1199-3p	down	-3.27	0.000426996	NA
hsa-miR-937-5p	down	-3.3	8.64938e-05	NA
hsa-miR-6823-3p	down	-3.3	0.000277	NA
hsa-miR-4677-5p	down	-3.3	0.0184573	NA
hsa-miR-4697-3p	down	-3.33	0.00272133	NA
hsa-miR-935	down	-3.35	0.00173178	NA
hsa-miR-1238-3p	down	-3.35	0.000228909	NA
hsa-miR-4794	down	-3.36	0.0434885	NA
hsa-miR-6781-3p	down	-3.38	0.000541039	NA
hsa-miR-4642	down	-3.39	0.000553438	NA
hsa-miR-513c-5p	down	-3.41	0.0412714	NA
hsa-miR-1909-3p	down	-3.44	0.000141205	NA
hsa-miR-7153-3p	down	-3.48	0.0184185	NA
hsa-miR-668-5p	down	-3.5	0.000560708	NA
hsa-miR-202-5p	down	-3.54	0.0158766	NA
hsa-miR-4636	down	-3.61	0.0208113	NA
hsa-miR-889-5p	down	-3.63	0.00869458	NA
hsa-miR-4707-5p	down	-3.74	0.000228909	NA
hsa-miR-412-3p	down	-3.76	0.00156201	NA
hsa-miR-4686	down	-3.8	0.00472908	NA
hsa-miR-7107-3p	down	-3.95	0.00173178	NA
hsa-miR-4724-3p	down	-3.95	0.00298736	NA
hsa-miR-218-2-3p	down	-3.98	0.000451259	NA
hsa-miR-6859-5p	down	-4.05	8.64938e-05	NA
hsa-miR-2276-5p	down	-4.19	0.000249502	NA
hsa-miR-6811-5p	down	-4.34	0.00278266	NA
hsa-miR-6757-3p	down	-4.39	0.000249119	NA
hsa-miR-6789-3p	down	-4.42	8.64938e-05	NA
hsa-miR-1207-3p	down	-4.45	0.000898781	NA
hsa-miR-3618	down	-4.51	0.000864859	NA
hsa-miR-6720-5p	down	-4.71	0.000240156	NA
hsa-miR-4440	down	-5.31	6.30449e-05	NA
hsa-miR-4262	down	-5.67	0.000228909	NA

## Sheet: T vaginalis over P bivia
hsa-miRNA	status	log2 FC	adjustedP	miRNA ID update (miRbase Release 22.1)
hsa-miR-6846-5p	down	-8.53	3.34281e-06	NA
hsa-miR-4417	up	5.08	1.23888e-05	NA
hsa-miR-6778-5p	up	5.23	1.23888e-05	NA
hsa-miR-3687	up	4.63	4.46839e-05	NA
hsa-miR-6780b-5p	up	3.61	4.96003e-05	NA
hsa-miR-6752-5p	up	4.1	5.06915e-05	NA
hsa-miR-1255b-2-3p	up	3.73	6.03193e-05	NA
hsa-miR-6799-5p	up	3.75	6.03193e-05	NA
hsa-miR-3176	down	-3.33	7.2339e-05	NA
hsa-miR-6771-5p	down	-2.8	9.65105e-05	NA
hsa-miR-5010-5p	up	3.59	0.000130281	NA
hsa-miR-548d-5p	up	2.86	0.000131741	NA
hsa-miR-548w	up	3.57	0.000131741	NA
hsa-miR-4449	up	2.78	0.000133725	NA
hsa-miR-548ay-5p	up	3.15	0.00016014	NA
hsa-miR-649	up	4.35	0.00016014	NA
hsa-miR-3674	up	3.26	0.000187557	NA
hsa-miR-1915-3p	up	2.27	0.000193327	NA
hsa-miR-6875-5p	up	2.52	0.000193327	NA
hsa-miR-920	up	3	0.000193327	NA
hsa-miR-4430	up	3.07	0.000193327	NA
hsa-miR-1273g-5p	up	3.37	0.000193327	NA
hsa-miR-4507	down	-2.45	0.000209485	NA
hsa-miR-3135a	up	2.43	0.000217998	NA
hsa-miR-6516-3p	up	2.67	0.000244071	NA
hsa-miR-548b-5p	up	3.69	0.000256217	NA
hsa-miR-663b	up	2.74	0.000276303	NA
hsa-miR-150-3p	up	3.02	0.000283903	NA
hsa-miR-4685-5p	up	3.44	0.00030339	NA
hsa-miR-1254	up	2.26	0.000325302	NA
hsa-miR-6800-5p	up	2.43	0.000325302	NA
hsa-miR-297	up	3.59	0.000325302	NA
hsa-miR-146a-5p	up	3.09	0.00032796	NA
hsa-miR-6894-5p	up	2.23	0.000332404	NA
hsa-miR-1273d	up	2.06	0.000354313	NA
hsa-miR-3180-3p	down	-2.06	0.000365074	NA
hsa-miR-96-5p	down	-1.74	0.000365074	NA
hsa-miR-1273h-5p	up	2.07	0.000365074	NA
hsa-miR-4728-5p	up	2.1	0.000365074	NA
hsa-miR-1273c	up	2.14	0.000365074	NA
hsa-miR-1273a	up	2.17	0.000365074	NA
hsa-miR-548e-5p	up	2.66	0.000365074	NA
hsa-miR-5684	up	2.78	0.000365074	NA
hsa-miR-4496	up	2.89	0.000365074	NA
hsa-miR-3609	up	2.9	0.000365074	NA
hsa-miR-548az-5p	up	3.15	0.000365074	NA
hsa-miR-664b-3p	up	3.15	0.000365074	NA
hsa-miR-6895-5p	up	2.85	0.000371775	NA
hsa-miR-4695-5p	up	1.97	0.000375426	NA
hsa-miR-3607-5p	up	2.76	0.000380097	NA
hsa-miR-211-3p	up	2.33	0.000419612	NA
hsa-let-7e-5p	down	-1.76	0.000492112	NA
hsa-let-7f-5p	down	-1.86	0.000507029	NA
hsa-miR-5585-3p	up	1.92	0.000514745	NA
hsa-miR-4646-5p	up	2.2	0.000541379	NA
hsa-miR-1207-5p	up	1.64	0.000552334	NA
hsa-miR-4486	up	1.89	0.000576529	NA
hsa-miR-1256	up	3.81	0.000606989	NA
hsa-miR-7851-3p	up	1.98	0.000622931	NA
hsa-miR-6085	up	1.9	0.000640269	NA
hsa-miR-3154	up	2.27	0.000688261	NA
hsa-miR-1322	up	2.55	0.00072387	NA
hsa-miR-27a-5p	up	2.01	0.000729579	NA
hsa-miR-4463	up	1.62	0.000784436	NA
hsa-miR-1285-5p	up	1.83	0.000788578	NA
hsa-let-7d-5p	down	-1.63	0.000806324	NA
hsa-miR-6126	up	1.99	0.000948589	NA
hsa-miR-548j-3p	up	2.84	0.00104592	NA
hsa-miR-6754-5p	up	2.25	0.00106778	NA
hsa-miR-664b-5p	up	3.07	0.00107809	NA
hsa-miR-6507-5p	down	-4.52	0.00110359	NA
hsa-miR-885-3p	up	2.37	0.00110612	NA
hsa-miR-6845-5p	up	1.76	0.00113944	NA
hsa-miR-7106-5p	up	2.13	0.00114111	NA
hsa-miR-616-3p	up	2.65	0.00116438	NA
hsa-miR-6516-5p	up	1.9	0.00116839	NA
hsa-miR-3679-5p	up	2.52	0.00116839	NA
hsa-miR-1291	up	2.87	0.00116839	NA
hsa-miR-1289	up	2.95	0.00130938	NA
hsa-miR-7111-5p	up	1.55	0.0014117	NA
hsa-miR-1303	up	1.87	0.00144165	NA
hsa-miR-6885-5p	up	2.13	0.00145873	NA
hsa-miR-7845-5p	down	-1.7	0.00149642	NA
hsa-miR-4459	up	1.46	0.00149642	NA
hsa-miR-3175	up	2.32	0.00156158	NA
hsa-miR-1290	up	1.95	0.00157191	NA
hsa-miR-6797-5p	up	1.7	0.00160825	NA
hsa-let-7a-5p	down	-1.36	0.00161533	NA
hsa-miR-564	up	2.04	0.00167594	NA
hsa-miR-1229-5p	up	1.87	0.0017169	NA
hsa-miR-492	up	2.51	0.0017169	NA
hsa-miR-574-5p	up	1.37	0.00185217	NA
hsa-miR-4446-3p	up	2.27	0.00185217	NA
hsa-miR-6741-5p	up	1.88	0.00195004	NA
hsa-miR-4655-5p	up	1.48	0.00195867	NA
hsa-miR-149-3p	up	1.53	0.00200984	NA
hsa-miR-3147	up	1.97	0.00200984	NA
hsa-miR-6833-5p	up	2.73	0.00200984	NA
hsa-miR-1299	up	2.17	0.00201359	NA
hsa-miR-5586-3p	up	3.18	0.00201359	NA
hsa-miR-6511a-5p	up	2.08	0.0020899	NA
hsa-miR-4270	up	1.58	0.00213112	NA
hsa-miR-4502	up	2.12	0.00213112	NA
hsa-miR-8089	up	1.61	0.0021804	NA
hsa-miR-6747-5p	up	2.22	0.00223248	NA
hsa-miR-5689	up	3.13	0.00233035	NA
hsa-miR-504-3p	up	1.61	0.00233781	NA
hsa-miR-4743-5p	up	2.77	0.00233781	NA
hsa-miR-650	up	2.27	0.00234832	NA
hsa-miR-5706	up	3.15	0.00234832	NA
hsa-miR-155-5p	down	-1.22	0.00236898	NA
hsa-miR-6127	up	1.45	0.00236898	NA
hsa-miR-3607-3p	up	3.03	0.00236898	NA
hsa-miR-1202	up	1.62	0.00240753	NA
hsa-miR-6819-5p	up	1.82	0.00244007	NA
hsa-miR-4428	up	2.26	0.00244455	NA
hsa-miR-6812-5p	up	1.66	0.00246165	NA
hsa-miR-5088-5p	up	1.99	0.00246165	NA
hsa-miR-4783-3p	up	2.29	0.00246165	NA
hsa-miR-4487	up	1.77	0.00252406	NA
hsa-miR-1914-3p	up	1.6	0.0025503	NA
hsa-miR-1914-5p	up	1.77	0.00259324	NA
hsa-miR-4271	up	1.37	0.00259611	NA
hsa-miR-6821-5p	up	1.46	0.00259888	NA
hsa-miR-3162-5p	up	2.01	0.0027047	NA
hsa-miR-612	up	2.45	0.00294169	NA
hsa-miR-466	up	3.23	0.00300419	NA
hsa-miR-9-5p	down	-1.31	0.00301069	NA
hsa-miR-3126-5p	up	1.82	0.00306662	NA
hsa-miR-8085	up	1.74	0.00310448	NA
hsa-miR-3187-5p	up	2.26	0.00322181	NA
hsa-miR-6086	up	1.51	0.0033824	NA
hsa-miR-4512	up	1.65	0.0033824	NA
hsa-miR-4701-3p	up	2.21	0.0033824	NA
hsa-miR-20a-3p	down	-1.34	0.0034926	NA
hsa-miR-4732-3p	up	1.93	0.00353688	NA
hsa-miR-566	up	1.36	0.00360063	NA
hsa-miR-4514	up	2.56	0.00367886	NA
hsa-miR-4667-5p	up	1.8	0.00374618	NA
hsa-miR-196a-5p	down	-1.38	0.00378549	NA
hsa-miR-196b-5p	down	-1.35	0.00380155	NA
hsa-miR-6837-5p	up	2.37	0.00382446	NA
hsa-miR-548h-5p	up	2.28	0.00418763	NA
hsa-miR-6851-5p	up	1.74	0.00420736	NA
hsa-miR-1225-3p	up	1.36	0.00433702	NA
hsa-miR-921	up	2.72	0.00445008	NA
hsa-miR-1229-3p	up	1.62	0.00456735	NA
hsa-miR-132-5p	down	-1.31	0.00463764	NA
hsa-miR-548y	up	3.28	0.00466306	NA
hsa-miR-6840-3p	up	2.1	0.00466985	NA
hsa-miR-4436b-3p	up	2.27	0.00467316	NA
hsa-miR-548ax	up	2.62	0.00467316	NA
hsa-miR-4665-5p	up	1.82	0.00509454	NA
hsa-miR-6848-5p	up	2.07	0.0051013	NA
hsa-miR-362-5p	down	-1.29	0.00518244	NA
hsa-miR-1910-3p	up	1.28	0.00518244	NA
hsa-miR-654-5p	up	1.33	0.00518244	NA
hsa-miR-21-5p	down	-1.03	0.00544204	NA
hsa-miR-6757-5p	up	1.83	0.00547525	NA
hsa-miR-765	up	1.52	0.00558145	NA
hsa-miR-4706	up	1.63	0.00564167	NA
hsa-miR-493-3p	up	3.01	0.00564167	NA
hsa-miR-200c-3p	down	-1.1	0.005678	NA
hsa-miR-15a-5p	down	-1.11	0.00574215	NA
hsa-miR-23c	down	-1.56	0.00574874	NA
hsa-miR-4722-5p	up	1.59	0.00574874	NA
hsa-miR-6801-5p	up	2.45	0.00595879	NA
hsa-miR-197-5p	up	1.16	0.00603994	NA
hsa-miR-4656	up	1.42	0.00660875	NA
hsa-miR-4800-5p	up	1.41	0.00677182	NA
hsa-miR-1267	up	2.44	0.00677182	NA
hsa-miR-4472	up	2.66	0.00677182	NA
hsa-miR-575	up	2.11	0.00677343	NA
hsa-miR-4726-5p	up	1.37	0.0071622	NA
hsa-miR-573	up	3.04	0.00718179	NA
hsa-miR-1304-3p	up	1.35	0.0075555	NA
hsa-miR-4680-5p	up	2.63	0.00756567	NA
hsa-miR-454-3p	down	-1.09	0.00764774	NA
hsa-miR-2467-3p	up	1.27	0.00764774	NA
hsa-miR-6804-3p	up	1.4	0.00764774	NA
hsa-miR-6890-3p	up	2.53	0.00764774	NA
hsa-miR-6779-5p	up	1.54	0.00786191	NA
hsa-miR-4261	up	2.19	0.00787843	NA
hsa-miR-6877-5p	up	1.48	0.0082706	NA
hsa-miR-8071	up	1.38	0.00828548	NA
hsa-miR-6734-3p	up	1.88	0.00828548	NA
hsa-miR-5009-5p	up	2.94	0.00828548	NA
hsa-miR-934	down	-1.27	0.00850258	NA
hsa-miR-194-5p	down	-1.05	0.0086309	NA
hsa-miR-4535	up	1.78	0.0086309	NA
hsa-miR-1225-5p	up	1.15	0.00863281	NA
hsa-miR-6893-5p	up	1.54	0.00918774	NA
hsa-miR-6076	up	1.8	0.00918774	NA
hsa-miR-4252	up	1.82	0.00918774	NA
hsa-miR-3652	up	1.34	0.00951245	NA
hsa-miR-8078	up	1.85	0.00951245	NA
hsa-miR-3973	up	3.39	0.00968819	NA
hsa-miR-4294	up	2.15	0.00989593	NA
hsa-miR-6873-5p	up	2.43	0.00989593	NA
hsa-miR-374b-5p	down	-1.06	0.0100538	NA
hsa-miR-4461	up	1.49	0.0100538	NA
hsa-miR-200b-3p	down	-0.91	0.0101276	NA
hsa-miR-5694	up	2.36	0.0102665	NA
hsa-miR-562	up	2.47	0.0105311	NA
hsa-miR-2392	up	1.31	0.0106133	NA
hsa-miR-6847-5p	up	2.64	0.0106133	NA
hsa-miR-4687-3p	up	1.84	0.0108727	NA
hsa-miR-6794-5p	up	1.23	0.0110518	NA
hsa-miR-5197-5p	up	2.75	0.0111541	NA
hsa-miR-1273e	up	1.05	0.0116778	NA
hsa-miR-6849-5p	up	1.83	0.0116778	NA
hsa-miR-4257	up	1.73	0.0117109	NA
hsa-miR-1234-3p	up	1.21	0.0118225	NA
hsa-miR-6760-5p	up	1.55	0.0121996	NA
hsa-miR-4421	up	1.93	0.0121996	NA
hsa-miR-1236-5p	up	1.46	0.0127452	NA
hsa-miR-5189-5p	up	2.01	0.0127452	NA
hsa-miR-670-5p	up	2.58	0.0127452	NA
hsa-miR-3648	up	1.14	0.0132949	NA
hsa-miR-4722-3p	up	1.47	0.0133399	NA
hsa-miR-6890-5p	up	1.94	0.0133399	NA
hsa-let-7d-3p	down	-0.97	0.01341	NA
hsa-miR-6745	up	2.98	0.0137885	NA
hsa-miR-6862-3p	up	1.5	0.0138869	NA
hsa-miR-4538	up	1.65	0.0139161	NA
hsa-miR-614	up	1.99	0.0139161	NA
hsa-miR-4419b	up	1.4	0.0140001	NA
hsa-miR-6864-5p	up	1.93	0.0142153	NA
hsa-miR-136-5p	up	1.57	0.0142589	NA
hsa-miR-3132	up	1.68	0.0142589	NA
hsa-miR-4499	up	1.78	0.0142608	NA
hsa-miR-7846-3p	up	1.75	0.0142916	NA
hsa-miR-6856-5p	up	2.2	0.014464	NA
hsa-miR-6755-3p	up	2.79	0.0145237	NA
hsa-miR-4478	up	1.13	0.0149532	NA
hsa-miR-4442	up	1.13	0.0149569	NA
hsa-miR-6807-3p	up	1.47	0.0149569	NA
hsa-miR-5087	up	3.11	0.0149569	NA
hsa-miR-4419a	up	2.14	0.0150997	NA
hsa-miR-29b-3p	down	-0.86	0.0152678	NA
hsa-miR-31-5p	down	-0.87	0.0153308	NA
hsa-let-7i-5p	down	-0.86	0.016097	NA
hsa-miR-3662	up	3.5	0.0163095	NA
hsa-miR-4688	up	1.12	0.016556	NA
hsa-miR-1227-3p	up	1.23	0.016556	NA
hsa-miR-6807-5p	up	1.48	0.016556	NA
hsa-miR-30c-5p	down	-0.86	0.0165776	NA
hsa-let-7c-5p	down	-0.88	0.0168211	NA
hsa-miR-204-5p	up	1.37	0.0168211	NA
hsa-miR-6796-5p	up	2.57	0.0168211	NA
hsa-miR-548ae	up	2.21	0.0168301	hsa-miR-548ae-3p
hsa-miR-7109-5p	up	1.96	0.017097	NA
hsa-miR-6819-3p	up	1.3	0.0178987	NA
hsa-miR-15b-5p	down	-0.97	0.0180332	NA
hsa-let-7g-5p	down	-0.86	0.0180332	NA
hsa-miR-6165	up	1.04	0.0191585	NA
hsa-miR-6722-3p	down	-1.02	0.0195071	NA
hsa-miR-6836-5p	up	1.42	0.0195071	NA
hsa-miR-7515	up	1.77	0.0195188	NA
hsa-miR-24-2-5p	down	-0.84	0.0206106	NA
hsa-miR-200a-3p	down	-0.82	0.0206106	NA
hsa-miR-6847-3p	up	1.93	0.0206106	NA
hsa-miR-3116	up	2.26	0.0206106	NA
hsa-miR-3064-3p	up	2.38	0.0206106	NA
hsa-miR-204-3p	up	1.01	0.0206972	NA
hsa-miR-6828-5p	up	2.71	0.0206972	NA
hsa-miR-26b-5p	down	-0.9	0.0213303	NA
hsa-miR-100-5p	down	-0.85	0.0213303	NA
hsa-miR-4640-3p	up	1.4	0.0213303	NA
hsa-miR-3675-3p	up	2.07	0.0213303	NA
hsa-miR-6873-3p	up	1.61	0.0222116	NA
hsa-miR-17-3p	down	-0.8	0.0222996	NA
hsa-miR-10b-5p	down	-0.88	0.023035	NA
hsa-miR-6760-3p	up	1.82	0.0234114	NA
hsa-miR-631	up	1.99	0.0234114	NA
hsa-miR-3064-5p	up	1.67	0.0236642	NA
hsa-miR-3929	up	0.98	0.0237907	NA
hsa-miR-6769a-5p	up	1.46	0.0242177	NA
hsa-miR-6887-5p	up	1.01	0.0245573	NA
hsa-miR-32-5p	down	-0.95	0.0248878	NA
hsa-miR-99a-5p	down	-0.8	0.0248878	NA
hsa-miR-6081	up	1.68	0.0248878	NA
hsa-miR-4452	up	1.92	0.0248878	NA
hsa-miR-590-5p	down	-0.78	0.0256851	NA
hsa-miR-6716-5p	up	1.27	0.026002	NA
hsa-miR-28-5p	down	-0.85	0.0260743	NA
hsa-miR-4312	up	1.8	0.0262967	NA
hsa-miR-125a-5p	down	-0.79	0.0263056	NA
hsa-miR-4728-3p	up	1.14	0.0264503	NA
hsa-miR-4299	up	1.94	0.0266833	NA
hsa-miR-885-5p	up	2.34	0.0270406	NA
hsa-miR-5572	up	2.43	0.0273112	NA
hsa-miR-630	up	2.43	0.0273112	NA
hsa-miR-4506	up	3.1	0.0273636	NA
hsa-miR-3974	up	2.63	0.0276457	NA
hsa-miR-302c-5p	up	2.43	0.0277967	NA
hsa-miR-4738-3p	up	2.44	0.0281825	NA
hsa-miR-3661	up	2.06	0.0284053	NA
hsa-miR-365a-5p	up	1.82	0.0286407	NA
hsa-miR-3156-5p	up	2.52	0.0295972	NA
hsa-miR-346	up	1.67	0.0302633	NA
hsa-miR-6772-5p	up	1.96	0.0302633	NA
hsa-miR-145-5p	up	1.18	0.0302906	NA
hsa-miR-6813-3p	up	1.45	0.0302906	NA
hsa-miR-4525	up	1.9	0.0302906	NA
hsa-miR-5006-5p	up	1.91	0.0302906	NA
hsa-miR-6776-3p	up	1.39	0.0304071	NA
hsa-miR-330-5p	down	-1.04	0.0306068	NA
hsa-let-7b-5p	down	-0.79	0.0307654	NA
hsa-miR-6882-3p	up	1.31	0.0307654	NA
hsa-miR-33a-5p	down	-0.75	0.0313446	NA
hsa-miR-6796-3p	up	1.73	0.0319605	NA
hsa-miR-363-3p	down	-0.78	0.0323261	NA
hsa-miR-6792-3p	up	1.4	0.0328199	NA
hsa-miR-6843-3p	up	2.86	0.0328199	NA
hsa-miR-135b-5p	down	-0.89	0.0331583	NA
hsa-miR-103a-3p	down	-0.77	0.0332454	NA
hsa-miR-449b-3p	up	1.62	0.0339172	NA
hsa-miR-4468	up	1.41	0.0341965	NA
hsa-miR-130b-5p	down	-0.81	0.03493	NA
hsa-miR-6827-5p	up	1.7	0.03545	NA
hsa-miR-10a-5p	down	-0.8	0.0355595	NA
hsa-miR-6801-3p	up	1.44	0.0356885	NA
hsa-miR-181a-5p	down	-0.77	0.0361632	NA
hsa-miR-761	up	2.65	0.0370675	NA
hsa-miR-5584-5p	up	3.14	0.0373128	NA
hsa-miR-182-5p	down	-0.8	0.0381743	NA
hsa-miR-20b-5p	down	-0.75	0.0381743	NA
hsa-miR-4691-5p	up	2.05	0.0381743	NA
hsa-miR-6829-5p	up	1.13	0.0385495	NA
hsa-miR-6780a-5p	up	1.32	0.0386297	NA
hsa-miR-4769-5p	up	1.33	0.0389642	NA
hsa-miR-141-5p	down	-0.89	0.0389711	NA
hsa-miR-143-3p	up	0.83	0.0391358	NA
hsa-miR-4725-5p	up	1.59	0.0391358	NA
hsa-miR-652-3p	down	-0.76	0.0392419	NA
hsa-miR-200b-5p	down	-0.92	0.0395294	NA
hsa-miR-8060	up	2.26	0.039782	NA
hsa-miR-495-3p	down	-1.1	0.0398956	NA
hsa-miR-944	down	-0.85	0.0398956	NA
hsa-miR-26a-5p	down	-0.79	0.0401832	NA
hsa-miR-424-5p	down	-0.75	0.0401832	NA
hsa-miR-4327	up	1.6	0.0401832	NA
hsa-miR-6738-3p	up	1.92	0.0401832	NA
hsa-miR-7154-3p	up	2.03	0.0406581	NA
hsa-miR-6133	up	1.42	0.0410489	NA
hsa-miR-183-5p	down	-0.76	0.0443379	NA
hsa-miR-33b-5p	down	-0.73	0.0443379	NA
hsa-miR-6880-5p	up	1.39	0.0444004	NA
hsa-miR-20a-5p	down	-0.77	0.0450009	NA
hsa-miR-154-3p	down	-1.4	0.0451976	NA
hsa-miR-30b-5p	down	-0.73	0.0452158	NA
hsa-miR-5703	up	0.97	0.0452617	NA
hsa-miR-6775-3p	up	0.98	0.0455187	NA
hsa-miR-632	up	1.75	0.0455187	NA
hsa-miR-6735-5p	up	1.61	0.0466466	NA
hsa-miR-1253	up	2.92	0.046786	NA
hsa-miR-5093	up	2.09	0.0473456	NA
hsa-miR-6830-5p	up	1.22	0.0486222	NA
hsa-miR-3149	down	-3.04	0.0491454	NA
hsa-miR-6810-3p	up	1.17	0.0494618	NA
hsa-miR-503-5p	down	-0.87	0.0496085	NA
hsa-miR-2909	up	3.24	0.0499549	NA
hsa-miR-1228-3p	up	1.15	0.0499953	NA
