# Supplementary material for: The microRNA Cargo of Human Vaginal Extracellular Vesicles Differentiates Parasitic and Pathobiont Infections from Colonization by Homeostatic Bacteria
Source: Microorganisms. 2023 Feb 21;11(3):551. doi: 10.3390/microorganisms11030551 (PMC10054151; doi:10.3390/microorganisms11030551)
Supplement: Supplementary file 1 [file microorganisms-11-00551-s001.zip › supplemental_info_final-20230221/Table S2 Venn-diagram miRNA.xls]

## Sheet: Venn miRNA table Tv-Pb
Uniquely UP by T. vaginalis	Uniquely DOWN by T. vaginalis	Uniquely UP P. bivia	Uniquely DOWN P. biva	shared UP T. vaginalis|P. bivia	T. vaginalis UP|P. biva DOWN	T. vaginalis DOWN|P. bivia UP	shared DOWN T. vaginalis|P. biva
hsa-miR-6846-5p	hsa-miR-4459	hsa-miR-6778-5p	hsa-miR-4520a-5p	hsa-miR-1249	hsa-miR-4507	hsa-miR-6780b-5p	hsa-miR-548ae
hsa-miR-3176	hsa-miR-4270	hsa-miR-146a-5p	hsa-miR-494-3p	hsa-miR-301b		hsa-miR-4449	hsa-miR-574-3p
hsa-miR-6771-5p	hsa-miR-1207-5p	hsa-miR-6885-5p	hsa-miR-2116-3p	hsa-let-7f-5p		hsa-miR-3609	hsa-miR-6775-5p
hsa-miR-6507-5p	hsa-miR-4655-5p	hsa-miR-6800-5p	hsa-miR-1343-5p	hsa-let-7e-5p		hsa-miR-3607-5p	hsa-miR-6789-5p
hsa-miR-154-3p	hsa-miR-6821-5p	hsa-miR-6126	hsa-miR-4758-5p	hsa-miR-96-5p		hsa-miR-920	hsa-miR-4707-3p
hsa-miR-5690	hsa-miR-6081	hsa-miR-27a-5p	hsa-miR-1244	hsa-let-7d-5p		hsa-miR-6799-5p	hsa-miR-6892-3p
hsa-miR-934	hsa-miR-6127	hsa-miR-6516-5p	hsa-miR-6781-5p	hsa-miR-23c		hsa-miR-6752-5p	hsa-miR-5739
hsa-miR-6073	hsa-miR-6825-5p	hsa-miR-4317	hsa-miR-326	hsa-miR-362-5p		hsa-miR-664b-5p	hsa-miR-6803-3p
hsa-miR-4802-5p	hsa-miR-6747-5p	hsa-miR-6516-3p	hsa-miR-1237-3p	hsa-miR-20a-3p		hsa-miR-664b-3p	hsa-miR-6124
hsa-miR-548k	hsa-miR-6885-3p	hsa-miR-6741-5p	hsa-miR-3934-3p	hsa-let-7a-5p		hsa-miR-4417	hsa-miR-1247-5p
hsa-miR-495-3p	hsa-miR-4419a	hsa-miR-6794-5p	hsa-miR-5001-3p	hsa-miR-196b-5p		hsa-miR-3687	hsa-miR-4667-3p
hsa-miR-651-3p	hsa-miR-5090	hsa-miR-6837-5p	hsa-miR-2115-3p	hsa-miR-454-3p			hsa-miR-6769b-3p
hsa-miR-7845-5p	hsa-miR-6887-5p	hsa-miR-1290	hsa-miR-6820-3p	hsa-miR-155-5p			hsa-miR-6797-3p
hsa-miR-1180-3p	hsa-miR-197-5p	hsa-miR-1291	hsa-miR-6765-5p	hsa-miR-200c-3p			hsa-miR-6852-5p
hsa-miR-195-5p	hsa-miR-6797-5p	hsa-miR-564	hsa-miR-937-3p	hsa-miR-9-5p			hsa-miR-4690-5p
hsa-miR-1293	hsa-miR-4669	hsa-miR-873-3p	hsa-miR-3155a	hsa-miR-196a-5p			hsa-miR-5196-5p
hsa-miR-3180-3p	hsa-miR-614	hsa-miR-3126-5p	hsa-miR-4655-3p	hsa-miR-15a-5p			hsa-miR-6795-3p
hsa-miR-10a-3p	hsa-miR-6812-5p	hsa-miR-1236-5p	hsa-miR-4664-3p	hsa-miR-32-5p			hsa-miR-4447
hsa-miR-1301-3p	hsa-miR-6893-5p	hsa-miR-149-3p	hsa-miR-6728-5p	hsa-miR-21-5p			hsa-miR-760
hsa-miR-9-3p	hsa-miR-6819-5p	hsa-miR-1225-5p	hsa-miR-519d-3p	hsa-let-7i-5p			hsa-miR-192-3p
hsa-miR-1262	hsa-miR-3670	hsa-miR-1914-3p	hsa-miR-615-3p	hsa-miR-31-5p			hsa-miR-6741-3p
hsa-miR-543	hsa-miR-1234-3p	hsa-miR-211-3p	hsa-miR-6722-3p	hsa-miR-374b-5p			hsa-miR-6784-5p
hsa-miR-200a-5p	hsa-miR-376c-5p	hsa-miR-4646-5p	hsa-miR-1910-5p	hsa-miR-582-5p			hsa-miR-6736-3p
hsa-miR-301a-5p	hsa-miR-6873-3p		hsa-miR-6783-3p	hsa-let-7c-5p			hsa-miR-4433b-5p
hsa-miR-33a-3p	hsa-miR-4682		hsa-miR-7703	hsa-miR-135b-5p			hsa-miR-6165
hsa-let-7f-1-3p	hsa-miR-6894-5p		hsa-miR-214-5p	hsa-miR-194-5p			hsa-miR-6794-3p
hsa-miR-454-5p	hsa-miR-7851-3p		hsa-miR-3692-5p	hsa-miR-28-5p			hsa-miR-7114-5p
hsa-miR-877-5p	hsa-miR-365a-5p		hsa-miR-136-3p	hsa-miR-29b-3p			hsa-miR-6767-5p
hsa-miR-2355-5p	hsa-miR-4676-3p		hsa-miR-4727-5p	hsa-miR-15b-5p			hsa-miR-3189-3p
hsa-miR-224-3p	hsa-miR-4769-5p		hsa-miR-4747-3p	hsa-miR-181a-5p			hsa-miR-7113-5p
hsa-miR-381-3p	hsa-miR-6875-5p		hsa-miR-487a-5p	hsa-miR-33a-5p			hsa-miR-6815-3p
hsa-miR-660-3p	hsa-miR-1304-5p		hsa-miR-6742-5p	hsa-miR-200a-3p			hsa-miR-7114-3p
hsa-miR-3657	hsa-miR-4294		hsa-miR-1178-5p	hsa-miR-10b-5p			hsa-miR-3197
hsa-miR-192-5p	hsa-miR-4476		hsa-miR-4658	hsa-miR-17-3p			hsa-miR-1273e
hsa-miR-330-3p	hsa-miR-3198		hsa-miR-4661-5p	hsa-let-7b-5p			hsa-miR-764
hsa-miR-335-3p	hsa-miR-6754-5p		hsa-miR-4326	hsa-miR-182-5p			hsa-miR-548ak
hsa-miR-148a-3p	hsa-miR-2467-3p		hsa-miR-6075	hsa-miR-103a-3p			hsa-miR-1224-5p
hsa-miR-449b-5p	hsa-miR-4467		hsa-miR-4762-5p	hsa-miR-708-5p			hsa-miR-503-3p
hsa-miR-5010-3p	hsa-miR-6810-5p		hsa-miR-4641	hsa-miR-342-5p			hsa-miR-943
hsa-miR-711	hsa-miR-3154		hsa-miR-6506-3p	hsa-miR-99b-5p			hsa-miR-6779-3p
hsa-miR-30d-3p	hsa-miR-548t-5p		hsa-miR-6715b-3p	hsa-miR-100-5p			hsa-miR-4734
hsa-miR-548e-3p	hsa-miR-7109-5p		hsa-miR-4726-3p	hsa-miR-141-3p			hsa-miR-6787-5p
hsa-miR-29c-5p	hsa-miR-7151-3p		hsa-miR-5571-5p	hsa-miR-331-3p			hsa-miR-4730
hsa-miR-125b-5p	hsa-miR-4695-5p		hsa-miR-153-5p	hsa-miR-130b-5p			hsa-miR-6723-5p
hsa-miR-16-1-3p	hsa-miR-6807-5p		hsa-miR-3660	hsa-miR-26b-5p			hsa-miR-767-5p
hsa-miR-101-5p	hsa-miR-541-3p		hsa-miR-4639-5p	hsa-miR-30c-5p			hsa-miR-1199-3p
hsa-miR-200c-5p	hsa-miR-3926		hsa-miR-4731-3p	hsa-miR-181c-5p			hsa-miR-4639-3p
hsa-miR-941	hsa-miR-4700-5p		hsa-miR-495-5p	hsa-miR-944			hsa-miR-657
hsa-miR-34a-3p	hsa-miR-4701-3p		hsa-miR-6780b-3p	hsa-let-7g-5p			hsa-miR-6747-3p
hsa-miR-1305	hsa-miR-4728-5p		hsa-miR-539-5p	hsa-miR-200b-3p			hsa-miR-6848-3p
hsa-miR-29c-3p	hsa-miR-3679-5p		hsa-miR-1288-3p	hsa-miR-26a-5p			hsa-miR-4296
hsa-miR-34c-5p	hsa-miR-6076		hsa-miR-3927-5p	hsa-miR-455-3p			hsa-miR-4721
hsa-miR-23a-5p	hsa-miR-6731-3p		hsa-miR-4652-3p	hsa-miR-24-2-5p			hsa-miR-5587-3p
hsa-miR-545-3p	hsa-miR-4535		hsa-miR-376b-5p	hsa-miR-5010-5p			hsa-miR-6829-5p
hsa-miR-154-5p	hsa-miR-6873-5p		hsa-miR-517-5p	hsa-miR-99a-5p			hsa-miR-766-3p
hsa-miR-4253	hsa-miR-6890-5p		hsa-miR-5685	hsa-miR-181b-5p			hsa-miR-4453
hsa-miR-99b-3p	hsa-miR-4257		hsa-miR-6503-5p	hsa-miR-141-5p			hsa-miR-4733-3p
hsa-miR-3613-3p	hsa-miR-4477b		hsa-miR-5693	hsa-miR-363-3p			hsa-miR-1250-3p
hsa-miR-212-5p	hsa-miR-6849-5p		hsa-miR-662	hsa-miR-452-5p			hsa-miR-4297
hsa-miR-485-3p	hsa-miR-2276-3p		hsa-miR-770-5p	hsa-miR-652-3p			hsa-miR-6768-5p
hsa-miR-335-5p	hsa-miR-4486		hsa-miR-1208	hsa-miR-10a-5p			hsa-miR-8069
hsa-miR-95-3p	hsa-miR-6853-5p		hsa-miR-380-5p	hsa-miR-107			hsa-miR-3186-5p
hsa-miR-6887-3p	hsa-miR-3192-5p		hsa-miR-6770-3p	hsa-miR-132-5p			hsa-miR-5589-5p
hsa-let-7g-3p	hsa-miR-1183		hsa-miR-6855-5p	hsa-miR-330-5p			hsa-miR-6791-3p
hsa-miR-212-3p	hsa-miR-4463		hsa-miR-3689d	hsa-miR-33b-5p			hsa-miR-6855-3p
hsa-miR-30c-2-3p	hsa-miR-4525		hsa-miR-635	hsa-miR-30b-5p			hsa-miR-6737-3p
hsa-miR-6835-5p	hsa-miR-298		hsa-miR-4743-3p	hsa-miR-181d-5p			hsa-miR-6791-5p
hsa-miR-186-3p	hsa-miR-4514		hsa-miR-4456	hsa-miR-23b-3p			hsa-miR-1587
hsa-miR-628-5p	hsa-miR-6884-5p		hsa-miR-452-3p	hsa-miR-23a-3p			hsa-miR-3191-3p
hsa-miR-424-3p	hsa-miR-571		hsa-miR-3689f	hsa-miR-126-3p			hsa-miR-548aw
hsa-miR-34c-3p	hsa-miR-127-3p		hsa-miR-432-3p	hsa-miR-18a-5p			hsa-miR-6871-5p
hsa-miR-874-3p	hsa-miR-575		hsa-miR-508-5p	hsa-miR-301a-3p			hsa-miR-4654
hsa-miR-26b-3p	hsa-miR-6501-3p		hsa-miR-4677-5p	hsa-miR-501-5p			hsa-miR-6830-3p
hsa-miR-500b-3p	hsa-miR-8089		hsa-miR-4697-3p	hsa-miR-106b-5p			hsa-miR-6799-3p
hsa-miR-551a	hsa-miR-3064-5p		hsa-miR-4794	hsa-miR-183-5p			hsa-miR-138-1-3p
	hsa-miR-574-5p		hsa-miR-513c-5p	hsa-miR-425-5p			hsa-miR-143-5p
	hsa-miR-6750-5p		hsa-miR-7153-3p	hsa-miR-455-5p			hsa-miR-323b-5p
	hsa-miR-6857-3p		hsa-miR-202-5p	hsa-miR-651-5p			hsa-miR-6851-3p
	hsa-miR-3159		hsa-miR-4636	hsa-miR-361-3p			hsa-miR-2278
	hsa-miR-4487		hsa-miR-412-3p	hsa-miR-200b-5p			hsa-miR-4470
	hsa-miR-4430		hsa-miR-4686	hsa-miR-30d-5p			hsa-miR-6889-3p
	hsa-miR-4691-3p		hsa-miR-4724-3p	hsa-miR-30e-3p			hsa-miR-219b-3p
	hsa-miR-6870-3p		hsa-miR-7107-3p	hsa-miR-27a-3p			hsa-miR-6781-3p
	hsa-miR-6877-5p		hsa-miR-6811-5p	hsa-miR-20a-5p			hsa-miR-4302
	hsa-miR-5194		hsa-miR-1207-3p	hsa-miR-378d			hsa-miR-6836-5p
	hsa-miR-195-3p			hsa-miR-17-5p			hsa-miR-6859-3p
	hsa-miR-4461			hsa-miR-18b-5p			hsa-miR-6751-5p
	hsa-miR-6868-5p			hsa-miR-29a-5p			hsa-miR-3689a-5p
	hsa-miR-1205			hsa-miR-30a-3p			hsa-miR-4290
	hsa-miR-383-5p			hsa-miR-378i			hsa-miR-6757-3p
	hsa-miR-3683			hsa-miR-590-5p			hsa-miR-1304-3p
	hsa-miR-4435			hsa-miR-876-5p			hsa-miR-646
	hsa-miR-7111-5p			hsa-miR-16-5p			hsa-miR-6500-5p
	hsa-miR-3916			hsa-miR-224-5p			hsa-miR-1250-5p
	hsa-miR-6834-5p			hsa-miR-30a-5p			hsa-miR-4746-5p
	hsa-miR-3617-3p			hsa-miR-589-3p			hsa-miR-6806-5p
	hsa-miR-4299			hsa-miR-93-5p			hsa-miR-1301-5p
	hsa-miR-765			hsa-miR-20b-5p			hsa-miR-4769-3p
	hsa-miR-211-5p			hsa-miR-378c			hsa-miR-6501-5p
	hsa-miR-4706			hsa-miR-429			hsa-miR-6729-3p
	hsa-miR-6874-3p			hsa-miR-106a-5p			hsa-miR-4701-5p
	hsa-miR-6735-5p			hsa-miR-19a-3p			hsa-miR-4763-3p
	hsa-miR-431-3p			hsa-miR-378e			hsa-miR-1471
	hsa-miR-3134			hsa-miR-502-3p			hsa-miR-3177-5p
	hsa-miR-3678-3p			hsa-miR-625-5p			hsa-miR-3118
	hsa-miR-5003-5p			hsa-miR-221-5p			hsa-miR-3614-5p
	hsa-miR-3162-5p			hsa-miR-664a-3p			hsa-miR-4656
	hsa-miR-410-5p			hsa-miR-191-5p			hsa-miR-345-3p
	hsa-miR-6069			hsa-miR-218-5p			hsa-miR-1227-3p
	hsa-miR-634			hsa-miR-222-3p			hsa-miR-3150b-5p
	hsa-miR-8062			hsa-miR-378a-3p			hsa-miR-6872-3p
	hsa-miR-5088-5p			hsa-miR-532-5p			hsa-miR-3680-5p
	hsa-miR-675-5p			hsa-miR-152-3p			hsa-miR-4519
	hsa-miR-3975			hsa-miR-422a			hsa-miR-6825-3p
	hsa-miR-6856-5p			hsa-miR-101-3p			hsa-miR-4786-3p
	hsa-miR-1229-5p			hsa-miR-149-5p			hsa-miR-647
	hsa-miR-1247-3p			hsa-miR-19b-3p			hsa-miR-6767-3p
	hsa-miR-3922-3p			hsa-miR-30e-5p			hsa-miR-4293
	hsa-miR-3925-5p			hsa-miR-377-3p			hsa-miR-593-3p
	hsa-miR-885-3p			hsa-miR-378g			hsa-miR-8071
	hsa-miR-4738-3p			hsa-miR-660-5p			hsa-miR-935
	hsa-miR-1273d			hsa-miR-505-3p			hsa-miR-6759-3p
	hsa-miR-1204			hsa-miR-624-5p			hsa-miR-6854-5p
	hsa-miR-325			hsa-miR-92a-3p			hsa-miR-7156-3p
	hsa-miR-150-3p			hsa-let-7d-3p			hsa-miR-548ay-3p
	hsa-miR-656-5p			hsa-miR-185-5p			hsa-miR-1263
	hsa-miR-6755-3p			hsa-miR-27b-5p			hsa-miR-6511a-3p
	hsa-miR-4743-5p			hsa-miR-342-3p			hsa-miR-675-3p
	hsa-miR-8057			hsa-miR-501-3p			hsa-miR-450a-2-3p
	hsa-miR-1302			hsa-miR-27b-3p			hsa-miR-3127-3p
	hsa-miR-525-5p			hsa-let-7a-3p			hsa-miR-4660
	hsa-miR-6889-5p			hsa-miR-505-5p			hsa-miR-4756-5p
	hsa-miR-8060			hsa-miR-193a-3p			hsa-miR-6514-3p
	hsa-miR-5197-3p			hsa-miR-378f			hsa-miR-2276-5p
	hsa-miR-373-3p			hsa-miR-500a-5p			hsa-miR-4515
	hsa-miR-492			hsa-miR-598-3p			hsa-miR-4687-3p
	hsa-miR-5006-5p			hsa-miR-106b-3p			hsa-miR-521
	hsa-miR-511-5p			hsa-miR-125a-5p			hsa-miR-637
	hsa-miR-632			hsa-miR-148b-3p			hsa-miR-6861-3p
	hsa-miR-4452			hsa-miR-584-5p			hsa-miR-6876-3p
	hsa-miR-6511a-5p			hsa-miR-210-3p			hsa-miR-8077
	hsa-miR-4774-3p			hsa-miR-22-5p			hsa-miR-1539
	hsa-miR-4314			hsa-miR-629-5p			hsa-miR-3192-3p
	hsa-miR-6847-5p			hsa-miR-126-5p			hsa-miR-6720-5p
	hsa-miR-133a-3p			hsa-miR-205-5p			hsa-miR-6891-3p
	hsa-miR-885-5p			hsa-miR-769-5p			hsa-miR-5705
	hsa-miR-1273h-5p			hsa-miR-93-3p			hsa-miR-608
	hsa-miR-6805-5p			hsa-miR-181a-2-3p			hsa-miR-1909-5p
	hsa-miR-6759-5p			hsa-miR-320a			hsa-miR-378j
	hsa-miR-6857-5p			hsa-miR-34a-5p			hsa-miR-4484
	hsa-miR-618			hsa-miR-424-5p			hsa-miR-6772-3p
	hsa-miR-4436b-3p			hsa-miR-503-5p			hsa-miR-6809-3p
	hsa-miR-7106-5p			hsa-miR-744-5p			hsa-miR-566
	hsa-miR-1299			hsa-miR-128-3p			hsa-miR-1976
	hsa-miR-3191-5p			hsa-miR-24-3p			hsa-miR-6787-3p
	hsa-miR-4254			hsa-miR-361-5p			hsa-miR-329-5p
	hsa-miR-6745			hsa-miR-500a-3p			hsa-miR-6736-5p
	hsa-miR-3607-3p			hsa-miR-140-5p			hsa-miR-7162-5p
	hsa-miR-4273			hsa-miR-25-3p			hsa-miR-6726-3p
	hsa-miR-612			hsa-miR-92b-3p			hsa-miR-6801-3p
	hsa-miR-7151-5p			hsa-miR-151a-3p			hsa-miR-1251-3p
	hsa-miR-7157-3p			hsa-miR-193b-3p			hsa-miR-3618
	hsa-miR-3977			hsa-miR-221-3p			hsa-miR-5196-3p
	hsa-miR-562			hsa-miR-331-5p			hsa-miR-1303
	hsa-miR-663b			hsa-miR-362-3p			hsa-miR-3155b
	hsa-miR-5197-5p			hsa-miR-130a-3p			hsa-miR-4750-5p
	hsa-miR-6813-5p			hsa-miR-193a-5p			hsa-miR-3689a-3p
	hsa-miR-6847-3p			hsa-miR-324-5p			hsa-miR-5188
	hsa-miR-3974			hsa-miR-4429			hsa-miR-6500-3p
	hsa-miR-5195-3p			hsa-miR-320b			hsa-miR-4498
	hsa-miR-6801-5p			hsa-miR-378b			hsa-miR-5571-3p
	hsa-miR-3922-5p			hsa-miR-4665-5p			hsa-miR-604
	hsa-miR-6758-3p			hsa-miR-484			hsa-miR-6511b-3p
	hsa-miR-6833-5p			hsa-miR-320c			hsa-miR-6823-3p
	hsa-miR-4786-5p			hsa-miR-324-3p			hsa-miR-4649-5p
	hsa-miR-630			hsa-miR-181a-3p			hsa-miR-5088-3p
	hsa-miR-6748-5p			hsa-miR-502-5p			hsa-miR-6754-3p
	hsa-miR-203b-5p			hsa-miR-577			hsa-miR-6779-5p
	hsa-miR-6792-5p			hsa-miR-188-5p			hsa-miR-4327
	hsa-miR-924			hsa-miR-320d			hsa-miR-6751-3p
	hsa-miR-597-3p			hsa-miR-365a-3p			hsa-miR-218-2-3p
	hsa-miR-6835-3p			hsa-miR-579-3p			hsa-miR-4305
	hsa-miR-3116			hsa-miR-296-5p			hsa-miR-1915-5p
	hsa-miR-1269b			hsa-miR-130b-3p			hsa-miR-554
	hsa-miR-130a-5p			hsa-miR-186-5p			hsa-miR-4722-5p
	hsa-miR-4783-3p			hsa-miR-22-3p			hsa-miR-146a-3p
	hsa-miR-5684			hsa-miR-873-5p			hsa-miR-572
	hsa-miR-3973			hsa-miR-146b-5p			hsa-miR-6841-3p
	hsa-miR-4329			hsa-miR-589-5p			hsa-miR-1913
	hsa-miR-1273g-5p			hsa-let-7f-2-3p			hsa-miR-194-3p
	hsa-miR-3064-3p			hsa-miR-320e			hsa-miR-323a-5p
	hsa-miR-548v			hsa-miR-425-3p			hsa-miR-4675
	hsa-miR-206			hsa-miR-340-5p			hsa-miR-6793-5p
	hsa-miR-302c-5p			hsa-miR-491-5p			hsa-miR-488-5p
	hsa-miR-761			hsa-miR-1537-3p			hsa-miR-3907
	hsa-miR-8053			hsa-miR-15b-3p			hsa-miR-5589-3p
	hsa-miR-3662			hsa-miR-21-3p			hsa-miR-6807-3p
	hsa-miR-573			hsa-miR-6088			hsa-miR-1285-5p
	hsa-miR-1911-5p			hsa-miR-1296-5p			hsa-miR-3147
	hsa-miR-3680-3p			hsa-miR-34b-5p			hsa-miR-124-5p
	hsa-miR-8061			hsa-miR-103a-2-5p			hsa-miR-1178-3p
	hsa-miR-4680-5p			hsa-miR-500b-5p			hsa-miR-3917
	hsa-miR-644a			hsa-miR-4306			hsa-miR-449b-3p
	hsa-miR-8063			hsa-miR-18a-3p			hsa-miR-4538
	hsa-miR-670-5p			hsa-miR-421			hsa-miR-548g-3p
	hsa-miR-891b			hsa-miR-345-5p			hsa-miR-1233-3p
	hsa-miR-4685-5p			hsa-miR-449a			hsa-miR-593-5p
	hsa-miR-613			hsa-miR-4664-5p			hsa-miR-1254
	hsa-miR-2909			hsa-miR-378h			hsa-miR-3690
	hsa-miR-6128			hsa-miR-1307-3p			hsa-miR-6750-3p
	hsa-miR-4496			hsa-miR-29a-3p			hsa-miR-4512
	hsa-miR-517a-3p			hsa-miR-132-3p			hsa-miR-210-5p
	hsa-miR-383-3p			hsa-miR-139-5p			hsa-miR-4518
	hsa-miR-548ax			hsa-miR-7-1-3p			hsa-miR-6762-3p
	hsa-miR-1261			hsa-miR-205-3p			hsa-miR-5585-3p
	hsa-miR-548d-5p			hsa-miR-125a-3p			hsa-miR-6761-3p
	hsa-miR-5586-3p			hsa-miR-2110			hsa-miR-758-5p
	hsa-miR-5706			hsa-miR-23b-5p			hsa-miR-1231
	hsa-miR-548j-3p			hsa-miR-19b-1-5p			hsa-miR-33b-3p
	hsa-miR-493-3p			hsa-miR-339-5p			hsa-miR-668-5p
	hsa-miR-921			hsa-miR-532-3p			hsa-miR-6785-3p
	hsa-miR-548ab			hsa-miR-181c-3p			hsa-miR-6827-5p
	hsa-miR-5584-5p			hsa-miR-542-3p			hsa-miR-3677-5p
	hsa-miR-5689			hsa-miR-7150			hsa-miR-1184
	hsa-miR-520c-3p			hsa-miR-198			hsa-miR-1273c
	hsa-miR-5680			hsa-miR-876-3p			hsa-miR-6870-5p
	hsa-miR-1253			hsa-miR-671-5p			hsa-miR-6735-3p
	hsa-miR-5191			hsa-miR-193b-5p			hsa-miR-4494
	hsa-miR-4280						hsa-miR-7160-5p
	hsa-miR-450b-3p						hsa-miR-5698
	hsa-miR-548y						hsa-miR-6506-5p
	hsa-miR-5009-5p						hsa-miR-4322
	hsa-miR-5087						hsa-miR-370-5p
	hsa-miR-1256						hsa-miR-504-3p
	hsa-miR-4506						hsa-miR-6827-3p
	hsa-miR-1272						hsa-miR-4446-3p
							hsa-miR-6078
							hsa-miR-4304
							hsa-miR-490-5p
							hsa-miR-6776-3p
							hsa-miR-4649-3p
							hsa-miR-4274
							hsa-miR-4483
							hsa-miR-5002-3p
							hsa-miR-6737-5p
							hsa-miR-7850-5p
							hsa-miR-2682-3p
							hsa-miR-6878-3p
							hsa-miR-7111-3p
							hsa-miR-4640-3p
							hsa-miR-370-3p
							hsa-miR-6790-5p
							hsa-miR-1228-3p
							hsa-miR-6877-3p
							hsa-miR-7109-3p
							hsa-miR-6813-3p
							hsa-miR-6886-3p
							hsa-miR-1202
							hsa-miR-3619-3p
							hsa-miR-3663-5p
							hsa-miR-6775-3p
							hsa-miR-4632-3p
							hsa-miR-5004-3p
							hsa-miR-6845-5p
							hsa-miR-4722-3p
							hsa-miR-5190
							hsa-miR-4793-3p
							hsa-miR-6772-5p
							hsa-miR-4502
							hsa-miR-1273a
							hsa-miR-4642
							hsa-miR-4728-3p
							hsa-miR-5189-3p
							hsa-miR-1236-3p
							hsa-miR-6882-3p
							hsa-miR-1324
							hsa-miR-146b-3p
							hsa-miR-6734-3p
							hsa-miR-6848-5p
							hsa-miR-7843-5p
							hsa-miR-487b-5p
							hsa-miR-4723-3p
							hsa-miR-5694
							hsa-miR-3620-3p
							hsa-miR-6819-3p
							hsa-miR-1225-3p
							hsa-miR-196a-3p
							hsa-miR-6810-3p
							hsa-miR-4537
							hsa-miR-1229-3p
							hsa-miR-138-2-3p
							hsa-miR-3655
							hsa-miR-6811-3p
							hsa-miR-3135a
							hsa-miR-4262
							hsa-miR-4267
							hsa-miR-4269
							hsa-miR-548h-5p
							hsa-miR-4663
							hsa-miR-4707-5p
							hsa-miR-668-3p
							hsa-miR-6782-3p
							hsa-miR-7154-5p
							hsa-miR-595
							hsa-miR-7106-3p
							hsa-miR-3661
							hsa-miR-5189-5p
							hsa-miR-1238-5p
							hsa-miR-1267
							hsa-miR-4292
							hsa-miR-6884-3p
							hsa-miR-892b
							hsa-miR-616-3p
							hsa-miR-6800-3p
							hsa-miR-346
							hsa-miR-548e-5p
							hsa-miR-6840-3p
							hsa-miR-4695-3p
							hsa-miR-6728-3p
							hsa-miR-4268
							hsa-miR-557
							hsa-miR-6760-3p
							hsa-miR-6822-3p
							hsa-miR-4252
							hsa-miR-134-3p
							hsa-miR-1914-5p
							hsa-miR-4539
							hsa-miR-6849-3p
							hsa-miR-4725-5p
							hsa-miR-4421
							hsa-miR-4732-3p
							hsa-miR-6796-3p
							hsa-miR-1538
							hsa-miR-6085
							hsa-miR-6792-3p
							hsa-miR-1238-3p
							hsa-miR-6893-3p
							hsa-miR-1915-3p
							hsa-miR-631
							hsa-miR-6778-3p
							hsa-miR-889-5p
							hsa-miR-3675-3p
							hsa-miR-4265
							hsa-miR-6804-3p
							hsa-miR-1909-3p
							hsa-miR-3187-5p
							hsa-miR-4690-3p
							hsa-miR-6738-3p
							hsa-miR-6837-3p
							hsa-miR-6862-3p
							hsa-miR-1322
							hsa-miR-6788-3p
							hsa-miR-875-3p
							hsa-miR-7160-3p
							hsa-miR-937-5p
							hsa-miR-548az-5p
							hsa-miR-6753-3p
							hsa-miR-1282
							hsa-miR-1269a
							hsa-miR-4726-5p
							hsa-miR-4472
							hsa-miR-1289
							hsa-miR-548ay-5p
							hsa-miR-5572
							hsa-miR-1200
							hsa-miR-6895-5p
							hsa-miR-661
							hsa-miR-6769a-3p
							hsa-miR-7974
							hsa-miR-6744-3p
							hsa-miR-4312
							hsa-miR-4477a
							hsa-miR-3674
							hsa-miR-6796-5p
							hsa-miR-6789-3p
							hsa-miR-466
							hsa-miR-548w
							hsa-miR-6890-3p
							hsa-miR-1911-3p
							hsa-miR-1255b-2-3p
							hsa-miR-4691-5p
							hsa-miR-6843-3p
							hsa-miR-297
							hsa-miR-6859-5p
							hsa-miR-548b-5p
							hsa-miR-4440
							hsa-miR-649
