# Supplementary material for: The microRNA Cargo of Human Vaginal Extracellular Vesicles Differentiates Parasitic and Pathobiont Infections from Colonization by Homeostatic Bacteria
Source: Microorganisms. 2023 Feb 21;11(3):551. doi: 10.3390/microorganisms11030551 (PMC10054151; doi:10.3390/microorganisms11030551)
Supplement: Supplementary file 1 [file microorganisms-11-00551-s001.zip › supplemental_info_final-20230221/Table S3 miRNA targets Pb-Tv.xlsx]

## Sheet: shared DOWN regulated proteins
From	Gene Name
SCOC	short coiled-coil protein(SCOC)
C5ORF24	chromosome 5 open reading frame 24(C5orf24)
CHIC1	cysteine rich hydrophobic domain 1(CHIC1)
ZFYVE9	zinc finger FYVE-type containing 9(ZFYVE9)
TMEM94	transmembrane protein 94(TMEM94)
CLDN2	claudin 2(CLDN2)
CLDN1	claudin 1(CLDN1)
SCAMP5	secretory carrier membrane protein 5(SCAMP5)
ZC3H12C	zinc finger CCCH-type containing 12C(ZC3H12C)
ZFYVE26	zinc finger FYVE-type containing 26(ZFYVE26)
ALKBH5	alkB homolog 5, RNA demethylase(ALKBH5)
PSMD7	proteasome 26S subunit, non-ATPase 7(PSMD7)
LSM11	LSM11, U7 small nuclear RNA associated(LSM11)
DPYSL2	dihydropyrimidinase like 2(DPYSL2)
AKT3	AKT serine/threonine kinase 3(AKT3)
ANKFY1	ankyrin repeat and FYVE domain containing 1(ANKFY1)
PKNOX1	PBX/knotted 1 homeobox 1(PKNOX1)
SAMD12	sterile alpha motif domain containing 12(SAMD12)
MEF2A	myocyte enhancer factor 2A(MEF2A)
RBFOX1	RNA binding fox-1 homolog 1(RBFOX1)
MEF2C	myocyte enhancer factor 2C(MEF2C)
GABARAPL1	GABA type A receptor associated protein like 1(GABARAPL1)
RBFOX2	RNA binding fox-1 homolog 2(RBFOX2)
ZNF281	zinc finger protein 281(ZNF281)
PHKA1	phosphorylase kinase regulatory subunit alpha 1(PHKA1)
DICER1	dicer 1, ribonuclease III(DICER1)
EML1	EMAP like 1(EML1)
SCAMP2	secretory carrier membrane protein 2(SCAMP2)
SLC5A6	solute carrier family 5 member 6(SLC5A6)
MOSMO	modulator of smoothened(MOSMO)
ZFYVE16	zinc finger FYVE-type containing 16(ZFYVE16)
MTHFD2	methylenetetrahydrofolate dehydrogenase (NADP+ dependent) 2, methenyltetrahydrofolate cyclohydrolase(MTHFD2)
LRATD2	LRAT domain containing 2(LRATD2)
PRKAR1A	protein kinase cAMP-dependent type I regulatory subunit alpha(PRKAR1A)
DDIT3	DNA damage inducible transcript 3(DDIT3)
ZC3H11A	zinc finger CCCH-type containing 11A(ZC3H11A)
DDIT4	DNA damage inducible transcript 4(DDIT4)
TBPL1	TATA-box binding protein like 1(TBPL1)
CLOCK	clock circadian regulator(CLOCK)
SF1	splicing factor 1(SF1)
MTMR3	myotubularin related protein 3(MTMR3)
CDCA4	cell division cycle associated 4(CDCA4)
GATA6	GATA binding protein 6(GATA6)
PDGFB	platelet derived growth factor subunit B(PDGFB)
TPRG1L	tumor protein p63 regulated 1 like(TPRG1L)
CDCA8	cell division cycle associated 8(CDCA8)
MTMR9	myotubularin related protein 9(MTMR9)
BAZ2A	bromodomain adjacent to zinc finger domain 2A(BAZ2A)
ABCB9	ATP binding cassette subfamily B member 9(ABCB9)
LYPD6	LY6/PLAUR domain containing 6(LYPD6)
GUCD1	guanylyl cyclase domain containing 1(GUCD1)
RDH11	retinol dehydrogenase 11(RDH11)
PRKAR2A	protein kinase cAMP-dependent type II regulatory subunit alpha(PRKAR2A)
GRPEL2	GrpE like 2, mitochondrial(GRPEL2)
PDGFC	platelet derived growth factor C(PDGFC)
PPARGC1A	PPARG coactivator 1 alpha(PPARGC1A)
ZNF268	zinc finger protein 268(ZNF268)
PPARGC1B	PPARG coactivator 1 beta(PPARGC1B)
EXPH5	exophilin 5(EXPH5)
EDEM3	ER degradation enhancing alpha-mannosidase like protein 3(EDEM3)
ABCA1	ATP binding cassette subfamily A member 1(ABCA1)
ZNF264	zinc finger protein 264(ZNF264)
PRRT2	proline rich transmembrane protein 2(PRRT2)
CADM2	cell adhesion molecule 2(CADM2)
PBX3	PBX homeobox 3(PBX3)
ERLIN1	ER lipid raft associated 1(ERLIN1)
PBX2	PBX homeobox 2(PBX2)
EIF5	eukaryotic translation initiation factor 5(EIF5)
AGO3	argonaute RISC catalytic component 3(AGO3)
AGO1	argonaute RISC component 1(AGO1)
AGO2	argonaute RISC catalytic component 2(AGO2)
NAPEPLD	N-acyl phosphatidylethanolamine phospholipase D(NAPEPLD)
C19ORF47	chromosome 19 open reading frame 47(C19orf47)
NMT2	N-myristoyltransferase 2(NMT2)
STRN	striatin(STRN)
FAT3	FAT atypical cadherin 3(FAT3)
AVL9	AVL9 cell migration associated(AVL9)
EZH1	enhancer of zeste 1 polycomb repressive complex 2 subunit(EZH1)
ARF1	ADP ribosylation factor 1(ARF1)
MTMR10	myotubularin related protein 10(MTMR10)
MTMR12	myotubularin related protein 12(MTMR12)
KCNC4	potassium voltage-gated channel subfamily C member 4(KCNC4)
OSBPL11	oxysterol binding protein like 11(OSBPL11)
BBC3	BCL2 binding component 3(BBC3)
MECP2	methyl-CpG binding protein 2(MECP2)
IKBKB	inhibitor of nuclear factor kappa B kinase subunit beta(IKBKB)
MED14	mediator complex subunit 14(MED14)
CHAF1A	chromatin assembly factor 1 subunit A(CHAF1A)
SH3BGRL3	SH3 domain binding glutamate rich protein like 3(SH3BGRL3)
JAK1	Janus kinase 1(JAK1)
APPL1	adaptor protein, phosphotyrosine interacting with PH domain and leucine zipper 1(APPL1)
PCMTD1	protein-L-isoaspartate (D-aspartate) O-methyltransferase domain containing 1(PCMTD1)
C11ORF24	chromosome 11 open reading frame 24(C11orf24)
DUSP5	dual specificity phosphatase 5(DUSP5)
DUSP2	dual specificity phosphatase 2(DUSP2)
ELOVL5	ELOVL fatty acid elongase 5(ELOVL5)
NIPA1	NIPA magnesium transporter 1(NIPA1)
LRRC40	leucine rich repeat containing 40(LRRC40)
ELOVL6	ELOVL fatty acid elongase 6(ELOVL6)
SIRT1	sirtuin 1(SIRT1)
DYNLL2	dynein light chain LC8-type 2(DYNLL2)
PGM2L1	phosphoglucomutase 2 like 1(PGM2L1)
MED28	mediator complex subunit 28(MED28)
PIGA	phosphatidylinositol glycan anchor biosynthesis class A(PIGA)
CHST1	carbohydrate sulfotransferase 1(CHST1)
PPARG	peroxisome proliferator activated receptor gamma(PPARG)
PAFAH1B2	platelet activating factor acetylhydrolase 1b catalytic subunit 2(PAFAH1B2)
PAFAH1B1	platelet activating factor acetylhydrolase 1b regulatory subunit 1(PAFAH1B1)
ARF6	ADP ribosylation factor 6(ARF6)
SLC29A2	solute carrier family 29 member 2(SLC29A2)
TMF1	TATA element modulatory factor 1(TMF1)
SZRD1	SUZ RNA binding domain containing 1(SZRD1)
SAMD8	sterile alpha motif domain containing 8(SAMD8)
ATL3	atlastin GTPase 3(ATL3)
ATL2	atlastin GTPase 2(ATL2)
MIEF1	mitochondrial elongation factor 1(MIEF1)
FAM117B	family with sequence similarity 117 member B(FAM117B)
NEURL1B	neuralized E3 ubiquitin protein ligase 1B(NEURL1B)
NRAS	NRAS proto-oncogene, GTPase(NRAS)
GGA3	golgi associated, gamma adaptin ear containing, ARF binding protein 3(GGA3)
STX6	syntaxin 6(STX6)
PLAGL2	PLAG1 like zinc finger 2(PLAGL2)
ZSWIM6	zinc finger SWIM-type containing 6(ZSWIM6)
STAT6	signal transducer and activator of transcription 6(STAT6)
STX3	syntaxin 3(STX3)
MEF2D	myocyte enhancer factor 2D(MEF2D)
EGLN3	egl-9 family hypoxia inducible factor 3(EGLN3)
SLF2	SMC5-SMC6 complex localization factor 2(SLF2)
KCNB1	potassium voltage-gated channel subfamily B member 1(KCNB1)
MBD2	methyl-CpG binding domain protein 2(MBD2)
STAT3	signal transducer and activator of transcription 3(STAT3)
DAB2IP	DAB2 interacting protein(DAB2IP)
TMEM64	transmembrane protein 64(TMEM64)
GATAD2B	GATA zinc finger domain containing 2B(GATAD2B)
DCBLD2	discoidin, CUB and LCCL domain containing 2(DCBLD2)
GID4	GID complex subunit 4 homolog(GID4)
SLCO3A1	solute carrier organic anion transporter family member 3A1(SLCO3A1)
ETNK1	ethanolamine kinase 1(ETNK1)
TAOK1	TAO kinase 1(TAOK1)
SLMAP	sarcolemma associated protein(SLMAP)
CCDC6	coiled-coil domain containing 6(CCDC6)
ZNF217	zinc finger protein 217(ZNF217)
CRLF3	cytokine receptor like factor 3(CRLF3)
EBAG9	estrogen receptor binding site associated antigen 9(EBAG9)
ERO1A	endoplasmic reticulum oxidoreductase 1 alpha(ERO1A)
CCNT2	cyclin T2(CCNT2)
CCNT1	cyclin T1(CCNT1)
TMEM167A	transmembrane protein 167A(TMEM167A)
UBE2D3	ubiquitin conjugating enzyme E2 D3(UBE2D3)
FBXO28	F-box protein 28(FBXO28)
ZBTB20	zinc finger and BTB domain containing 20(ZBTB20)
RORA	RAR related orphan receptor A(RORA)
MSI2	musashi RNA binding protein 2(MSI2)
FBXO21	F-box protein 21(FBXO21)
YY1	YY1 transcription factor(YY1)
POTEM	POTE ankyrin domain family member M(POTEM)
PTAR1	protein prenyltransferase alpha subunit repeat containing 1(PTAR1)
SLK	STE20 like kinase(SLK)
HEPHL1	hephaestin like 1(HEPHL1)
SESN3	sestrin 3(SESN3)
SESN1	sestrin 1(SESN1)
SESN2	sestrin 2(SESN2)
ZNF449	zinc finger protein 449(ZNF449)
NFATC2IP	nuclear factor of activated T cells 2 interacting protein(NFATC2IP)
KPNA6	karyopherin subunit alpha 6(KPNA6)
KPNA4	karyopherin subunit alpha 4(KPNA4)
SLC16A9	solute carrier family 16 member 9(SLC16A9)
MAP3K9	mitogen-activated protein kinase kinase kinase 9(MAP3K9)
KPNA2	karyopherin subunit alpha 2(KPNA2)
KPNA1	karyopherin subunit alpha 1(KPNA1)
ZNF200	zinc finger protein 200(ZNF200)
PPP1R16B	protein phosphatase 1 regulatory subunit 16B(PPP1R16B)
MYLIP	myosin regulatory light chain interacting protein(MYLIP)
FBXW7	F-box and WD repeat domain containing 7(FBXW7)
ZBTB34	zinc finger and BTB domain containing 34(ZBTB34)
FOXP4	forkhead box P4(FOXP4)
CDC25A	cell division cycle 25A(CDC25A)
EMSY	EMSY transcriptional repressor, BRCA2 interacting(EMSY)
FOXP1	forkhead box P1(FOXP1)
TXLNA	taxilin alpha(TXLNA)
DMTF1	cyclin D binding myb like transcription factor 1(DMTF1)
FSCN1	fascin actin-bundling protein 1(FSCN1)
SRSF2	serine and arginine rich splicing factor 2(SRSF2)
ROR1	receptor tyrosine kinase like orphan receptor 1(ROR1)
ARL8A	ADP ribosylation factor like GTPase 8A(ARL8A)
DSC2	desmocollin 2(DSC2)
NSMAF	neutral sphingomyelinase activation associated factor(NSMAF)
INO80D	INO80 complex subunit D(INO80D)
KMT2A	lysine methyltransferase 2A(KMT2A)
MAX	MYC associated factor X(MAX)
ARL3	ADP ribosylation factor like GTPase 3(ARL3)
ARL1	ADP ribosylation factor like GTPase 1(ARL1)
SPATA2	spermatogenesis associated 2(SPATA2)
FBXO48	F-box protein 48(FBXO48)
UBFD1	ubiquitin family domain containing 1(UBFD1)
CREBL2	cAMP responsive element binding protein like 2(CREBL2)
NREP	neuronal regeneration related protein(NREP)
FOXO1	forkhead box O1(FOXO1)
RAP1B	RAP1B, member of RAS oncogene family(RAP1B)
SBNO1	strawberry notch homolog 1(SBNO1)
NPAT	nuclear protein, coactivator of histone transcription(NPAT)
SNN	stannin(SNN)
BCL2L11	BCL2 like 11(BCL2L11)
ATXN1	ataxin 1(ATXN1)
SOCS1	suppressor of cytokine signaling 1(SOCS1)
STK35	serine/threonine kinase 35(STK35)
ATXN7	ataxin 7(ATXN7)
SLC38A7	solute carrier family 38 member 7(SLC38A7)
G3BP2	G3BP stress granule assembly factor 2(G3BP2)
BMF	Bcl2 modifying factor(BMF)
NPTX1	neuronal pentraxin 1(NPTX1)
SOCS6	suppressor of cytokine signaling 6(SOCS6)
EVI5	ecotropic viral integration site 5(EVI5)
IP6K3	inositol hexakisphosphate kinase 3(IP6K3)
CPA4	carboxypeptidase A4(CPA4)
SOCS5	suppressor of cytokine signaling 5(SOCS5)
NEK6	NIMA related kinase 6(NEK6)
ZBTB10	zinc finger and BTB domain containing 10(ZBTB10)
FOXN3	forkhead box N3(FOXN3)
ARPC5	actin related protein 2/3 complex subunit 5(ARPC5)
FOXN2	forkhead box N2(FOXN2)
QKI	QKI, KH domain containing RNA binding(QKI)
FBXO31	F-box protein 31(FBXO31)
PTPRD	protein tyrosine phosphatase receptor type D(PTPRD)
MOB4	MOB family member 4, phocein(MOB4)
SON	SON DNA and RNA binding protein(SON)
SP1	Sp1 transcription factor(SP1)
DMXL1	Dmx like 1(DMXL1)
AAK1	AP2 associated kinase 1(AAK1)
PIN1	peptidylprolyl cis/trans isomerase, NIMA-interacting 1(PIN1)
MDM4	MDM4 regulator of p53(MDM4)
OGT	O-linked N-acetylglucosamine (GlcNAc) transferase(OGT)
ZNF652	zinc finger protein 652(ZNF652)
TRIM71	tripartite motif containing 71(TRIM71)
ONECUT2	one cut homeobox 2(ONECUT2)
CELF1	CUGBP Elav-like family member 1(CELF1)
LRRK2	leucine rich repeat kinase 2(LRRK2)
ITGB3	integrin subunit beta 3(ITGB3)
SNAP23	synaptosome associated protein 23(SNAP23)
PTEN	phosphatase and tensin homolog(PTEN)
BICD2	BICD cargo adaptor 2(BICD2)
CAPZB	capping actin protein of muscle Z-line subunit beta(CAPZB)
PPP6R3	protein phosphatase 6 regulatory subunit 3(PPP6R3)
SUMO2	small ubiquitin like modifier 2(SUMO2)
ITGB8	integrin subunit beta 8(ITGB8)
PMEPA1	prostate transmembrane protein, androgen induced 1(PMEPA1)
ITGAV	integrin subunit alpha V(ITGAV)
C21ORF91	chromosome 21 open reading frame 91(C21orf91)
ZNF644	zinc finger protein 644(ZNF644)
ATP7A	ATPase copper transporting alpha(ATP7A)
SMIM13	small integral membrane protein 13(SMIM13)
PPP1R12A	protein phosphatase 1 regulatory subunit 12A(PPP1R12A)
VEZF1	vascular endothelial zinc finger 1(VEZF1)
RAD23B	RAD23 homolog B, nucleotide excision repair protein(RAD23B)
DDOST	dolichyl-diphosphooligosaccharide--protein glycosyltransferase non-catalytic subunit(DDOST)
SLC25A16	solute carrier family 25 member 16(SLC25A16)
PPM1A	protein phosphatase, Mg2+/Mn2+ dependent 1A(PPM1A)
SYNPO2L	synaptopodin 2 like(SYNPO2L)
PIK3CA	phosphatidylinositol-4,5-bisphosphate 3-kinase catalytic subunit alpha(PIK3CA)
LCOR	ligand dependent nuclear receptor corepressor(LCOR)
SMCR8	SMCR8-C9orf72 complex subunit(SMCR8)
ITGA6	integrin subunit alpha 6(ITGA6)
TOP1	DNA topoisomerase I(TOP1)
BCAT1	branched chain amino acid transaminase 1(BCAT1)
MET	MET proto-oncogene, receptor tyrosine kinase(MET)
TNFRSF21	TNF receptor superfamily member 21(TNFRSF21)
ITGA9	integrin subunit alpha 9(ITGA9)
PPP1R15B	protein phosphatase 1 regulatory subunit 15B(PPP1R15B)
PPM1L	protein phosphatase, Mg2+/Mn2+ dependent 1L(PPM1L)
PRCC	proline rich mitotic checkpoint control factor(PRCC)
MAK16	MAK16 homolog(MAK16)
NTN4	netrin 4(NTN4)
MLLT1	MLLT1 super elongation complex subunit(MLLT1)
FOXK1	forkhead box K1(FOXK1)
PPM1D	protein phosphatase, Mg2+/Mn2+ dependent 1D(PPM1D)
CDC42	cell division cycle 42(CDC42)
PARD6B	par-6 family cell polarity regulator beta(PARD6B)
DRAM1	DNA damage regulated autophagy modulator 1(DRAM1)
ZNRF3	zinc and ring finger 3(ZNRF3)
KCTD21	potassium channel tetramerization domain containing 21(KCTD21)
SLITRK4	SLIT and NTRK like family member 4(SLITRK4)
BAHD1	bromo adjacent homology domain containing 1(BAHD1)
NNAT	neuronatin(NNAT)
ATXN1L	ataxin 1 like(ATXN1L)
TP53INP1	tumor protein p53 inducible nuclear protein 1(TP53INP1)
SH3BP5	SH3 domain binding protein 5(SH3BP5)
E2F1	E2F transcription factor 1(E2F1)
IGF2BP1	insulin like growth factor 2 mRNA binding protein 1(IGF2BP1)
CDC37L1	cell division cycle 37 like 1, HSP90 cochaperone(CDC37L1)
BEND3	BEN domain containing 3(BEND3)
E2F2	E2F transcription factor 2(E2F2)
BEND4	BEN domain containing 4(BEND4)
E2F3	E2F transcription factor 3(E2F3)
IGF2BP3	insulin like growth factor 2 mRNA binding protein 3(IGF2BP3)
FEM1C	fem-1 homolog C(FEM1C)
E2F5	E2F transcription factor 5(E2F5)
HNRNPA1	heterogeneous nuclear ribonucleoprotein A1(HNRNPA1)
CNNM2	cyclin and CBS domain divalent metal cation transport mediator 2(CNNM2)
E2F6	E2F transcription factor 6(E2F6)
E2F7	E2F transcription factor 7(E2F7)
KCNJ2	potassium inwardly rectifying channel subfamily J member 2(KCNJ2)
PTPN1	protein tyrosine phosphatase non-receptor type 1(PTPN1)
HNRNPA3	heterogeneous nuclear ribonucleoprotein A3(HNRNPA3)
SLC12A5	solute carrier family 12 member 5(SLC12A5)
SEC24A	SEC24 homolog A, COPII coat complex component(SEC24A)
PRRX1	paired related homeobox 1(PRRX1)
FEM1B	fem-1 homolog B(FEM1B)
FOXJ3	forkhead box J3(FOXJ3)
MBOAT1	membrane bound O-acyltransferase domain containing 1(MBOAT1)
CABLES1	Cdk5 and Abl enzyme substrate 1(CABLES1)
LYSMD3	LysM domain containing 3(LYSMD3)
KIAA0232	KIAA0232(KIAA0232)
MCOLN2	mucolipin TRP cation channel 2(MCOLN2)
SLC25A37	solute carrier family 25 member 37(SLC25A37)
TSPAN14	tetraspanin 14(TSPAN14)
USH1G	USH1 protein network component sans(USH1G)
NOVA1	NOVA alternative splicing regulator 1(NOVA1)
SLC25A32	solute carrier family 25 member 32(SLC25A32)
PTPN4	protein tyrosine phosphatase non-receptor type 4(PTPN4)
TRIM32	tripartite motif containing 32(TRIM32)
SLC25A36	solute carrier family 25 member 36(SLC25A36)
TRIM33	tripartite motif containing 33(TRIM33)
AHCYL2	adenosylhomocysteinase like 2(AHCYL2)
CCNJ	cyclin J(CCNJ)
LPGAT1	lysophosphatidylglycerol acyltransferase 1(LPGAT1)
KDELR1	KDEL endoplasmic reticulum protein retention receptor 1(KDELR1)
GCC2	GRIP and coiled-coil domain containing 2(GCC2)
ZDHHC7	zinc finger DHHC-type palmitoyltransferase 7(ZDHHC7)
IKZF2	IKAROS family zinc finger 2(IKZF2)
IKZF4	IKAROS family zinc finger 4(IKZF4)
PEG10	paternally expressed 10(PEG10)
DHX57	DExH-box helicase 57(DHX57)
CDC27	cell division cycle 27(CDC27)
ATXN7L1	ataxin 7 like 1(ATXN7L1)
EPHB2	EPH receptor B2(EPHB2)
ACVR1	activin A receptor type 1(ACVR1)
EPHA4	EPH receptor A4(EPHA4)
EPHA7	EPH receptor A7(EPHA7)
ENTPD4	ectonucleoside triphosphate diphosphohydrolase 4(ENTPD4)
ENTPD7	ectonucleoside triphosphate diphosphohydrolase 7(ENTPD7)
ACTN4	actinin alpha 4(ACTN4)
TMEM170A	transmembrane protein 170A(TMEM170A)
PISD	phosphatidylserine decarboxylase(PISD)
EREG	epiregulin(EREG)
CDC34	cell division cycle 34, ubiqiutin conjugating enzyme(CDC34)
CCNY	cyclin Y(CCNY)
PPP1R3B	protein phosphatase 1 regulatory subunit 3B(PPP1R3B)
ULK2	unc-51 like autophagy activating kinase 2(ULK2)
TRIB1	tribbles pseudokinase 1(TRIB1)
STX1A	syntaxin 1A(STX1A)
PPP1R37	protein phosphatase 1 regulatory subunit 37(PPP1R37)
PCDH10	protocadherin 10(PCDH10)
TGFA	transforming growth factor alpha(TGFA)
PIK3R1	phosphoinositide-3-kinase regulatory subunit 1(PIK3R1)
ZBTB5	zinc finger and BTB domain containing 5(ZBTB5)
ZBTB4	zinc finger and BTB domain containing 4(ZBTB4)
RAB11FIP1	RAB11 family interacting protein 1(RAB11FIP1)
RRAS	RAS related(RRAS)
ANKH	ANKH inorganic pyrophosphate transport regulator(ANKH)
DHX33	DEAH-box helicase 33(DHX33)
RACGAP1	Rac GTPase activating protein 1(RACGAP1)
ZNF704	zinc finger protein 704(ZNF704)
N4BP2	NEDD4 binding protein 2(N4BP2)
RAB11FIP4	RAB11 family interacting protein 4(RAB11FIP4)
N4BP1	NEDD4 binding protein 1(N4BP1)
PAG1	phosphoprotein membrane anchor with glycosphingolipid microdomains 1(PAG1)
CTSA	cathepsin A(CTSA)
SLC10A7	solute carrier family 10 member 7(SLC10A7)
YES1	YES proto-oncogene 1, Src family tyrosine kinase(YES1)
FOXF2	forkhead box F2(FOXF2)
IQSEC1	IQ motif and Sec7 domain ArfGEF 1(IQSEC1)
RCC2	regulator of chromosome condensation 2(RCC2)
SURF4	surfeit 4(SURF4)
SMARCA5	SWI/SNF related, matrix associated, actin dependent regulator of chromatin, subfamily a, member 5(SMARCA5)
SUCO	SUN domain containing ossification factor(SUCO)
MYO5A	myosin VA(MYO5A)
IGF1	insulin like growth factor 1(IGF1)
ACER2	alkaline ceramidase 2(ACER2)
ANLN	anillin, actin binding protein(ANLN)
ZBTB6	zinc finger and BTB domain containing 6(ZBTB6)
WNK3	WNK lysine deficient protein kinase 3(WNK3)
CALU	calumenin(CALU)
ITGBL1	integrin subunit beta like 1(ITGBL1)
FBXL3	F-box and leucine rich repeat protein 3(FBXL3)
RCOR1	REST corepressor 1(RCOR1)
PPP1R11	protein phosphatase 1 regulatory inhibitor subunit 11(PPP1R11)
FKBP15	FKBP prolyl isomerase family member 15(FKBP15)
AP4E1	adaptor related protein complex 4 subunit epsilon 1(AP4E1)
PTPRJ	protein tyrosine phosphatase receptor type J(PTPRJ)
MIA3	MIA SH3 domain ER export factor 3(MIA3)
CROT	carnitine O-octanoyltransferase(CROT)
SLC7A11	solute carrier family 7 member 11(SLC7A11)
PTPRG	protein tyrosine phosphatase receptor type G(PTPRG)
AKAP10	A-kinase anchoring protein 10(AKAP10)
SPTLC1	serine palmitoyltransferase long chain base subunit 1(SPTLC1)
AKAP11	A-kinase anchoring protein 11(AKAP11)
CNTRL	centriolin(CNTRL)
KIF1B	kinesin family member 1B(KIF1B)
CCR7	C-C motif chemokine receptor 7(CCR7)
NDEL1	nudE neurodevelopment protein 1 like 1(NDEL1)
MMD	monocyte to macrophage differentiation associated(MMD)
NCOA3	nuclear receptor coactivator 3(NCOA3)
IL13	interleukin 13(IL13)
GAB1	GRB2 associated binding protein 1(GAB1)
RGMB	repulsive guidance molecule BMP co-receptor b(RGMB)
ZHX1	zinc fingers and homeoboxes 1(ZHX1)
ENAH	ENAH actin regulator(ENAH)
RAP2C	RAP2C, member of RAS oncogene family(RAP2C)
DUS2	dihydrouridine synthase 2(DUS2)
RAP2A	RAP2A, member of RAS oncogene family(RAP2A)
NR5A2	nuclear receptor subfamily 5 group A member 2(NR5A2)
KIT	KIT proto-oncogene, receptor tyrosine kinase(KIT)
STK40	serine/threonine kinase 40(STK40)
YAP1	Yes1 associated transcriptional regulator(YAP1)
CAB39	calcium binding protein 39(CAB39)
STX16	syntaxin 16(STX16)
SATB1	SATB homeobox 1(SATB1)
SATB2	SATB homeobox 2(SATB2)
GPALPP1	GPALPP motifs containing 1(GPALPP1)
GNAI3	G protein subunit alpha i3(GNAI3)
XIAP	X-linked inhibitor of apoptosis(XIAP)
TXLNG	taxilin gamma(TXLNG)
SERTAD3	SERTA domain containing 3(SERTAD3)
PAK1	p21 (RAC1) activated kinase 1(PAK1)
SLX4	SLX4 structure-specific endonuclease subunit(SLX4)
SERTAD2	SERTA domain containing 2(SERTAD2)
CAMK2N2	calcium/calmodulin dependent protein kinase II inhibitor 2(CAMK2N2)
PGGT1B	protein geranylgeranyltransferase type I subunit beta(PGGT1B)
MARCHF6	membrane associated ring-CH-type finger 6(MARCHF6)
MAP3K2	mitogen-activated protein kinase kinase kinase 2(MAP3K2)
MAP3K3	mitogen-activated protein kinase kinase kinase 3(MAP3K3)
GIT2	GIT ArfGAP 2(GIT2)
PLEKHA1	pleckstrin homology domain containing A1(PLEKHA1)
SPRYD4	SPRY domain containing 4(SPRYD4)
YIPF4	Yip1 domain family member 4(YIPF4)
KLK10	kallikrein related peptidase 10(KLK10)
VEGFA	vascular endothelial growth factor A(VEGFA)
MIB1	MIB E3 ubiquitin protein ligase 1(MIB1)
PER2	period circadian regulator 2(PER2)
FKBP1A	FKBP prolyl isomerase 1A(FKBP1A)
ZDHHC9	zinc finger DHHC-type palmitoyltransferase 9(ZDHHC9)
KIF26B	kinesin family member 26B(KIF26B)
FKBP1B	FKBP prolyl isomerase 1B(FKBP1B)
YIPF6	Yip1 domain family member 6(YIPF6)
CCNYL1	cyclin Y like 1(CCNYL1)
OTUD4	OTU deubiquitinase 4(OTUD4)
MIDN	midnolin(MIDN)
UBE3C	ubiquitin protein ligase E3C(UBE3C)
PRDM4	PR/SET domain 4(PRDM4)
UBXN2A	UBX domain protein 2A(UBXN2A)
DENND5B	DENN domain containing 5B(DENND5B)
ZFAND5	zinc finger AN1-type containing 5(ZFAND5)
GXYLT1	glucoside xylosyltransferase 1(GXYLT1)
CPOX	coproporphyrinogen oxidase(CPOX)
MSMO1	methylsterol monooxygenase 1(MSMO1)
NR3C1	nuclear receptor subfamily 3 group C member 1(NR3C1)
ETS1	ETS proto-oncogene 1, transcription factor(ETS1)
CELSR3	cadherin EGF LAG seven-pass G-type receptor 3(CELSR3)
ACTG1	actin gamma 1(ACTG1)
IGF1R	insulin like growth factor 1 receptor(IGF1R)
TXN2	thioredoxin 2(TXN2)
AMMECR1L	AMMECR1 like(AMMECR1L)
RGS3	regulator of G protein signaling 3(RGS3)
CCND2	cyclin D2(CCND2)
CAPN6	calpain 6(CAPN6)
CCND1	cyclin D1(CCND1)
KIF5B	kinesin family member 5B(KIF5B)
KIF5A	kinesin family member 5A(KIF5A)
ENPP2	ectonucleotide pyrophosphatase/phosphodiesterase 2(ENPP2)
SBF1	SET binding factor 1(SBF1)
ENPP5	ectonucleotide pyrophosphatase/phosphodiesterase family member 5(ENPP5)
PDGFRB	platelet derived growth factor receptor beta(PDGFRB)
SLC30A7	solute carrier family 30 member 7(SLC30A7)
KIRREL3	kirre like nephrin family adhesion molecule 3(KIRREL3)
PDGFRA	platelet derived growth factor receptor alpha(PDGFRA)
MMGT1	membrane magnesium transporter 1(MMGT1)
DIMT1	DIM1 rRNA methyltransferase and ribosome maturation factor(DIMT1)
ATG9A	autophagy related 9A(ATG9A)
DNAJB12	DnaJ heat shock protein family (Hsp40) member B12(DNAJB12)
UBE4A	ubiquitination factor E4A(UBE4A)
ADAM10	ADAM metallopeptidase domain 10(ADAM10)
SDHD	succinate dehydrogenase complex subunit D(SDHD)
PRLR	prolactin receptor(PRLR)
CCNE2	cyclin E2(CCNE2)
PSPC1	paraspeckle component 1(PSPC1)
CCNE1	cyclin E1(CCNE1)
PPIF	peptidylprolyl isomerase F(PPIF)
UBE2V1	ubiquitin conjugating enzyme E2 V1(UBE2V1)
RPP25	ribonuclease P and MRP subunit p25(RPP25)
PHAF1	phagosome assembly factor 1(PHAF1)
PPIC	peptidylprolyl isomerase C(PPIC)
DDX6	DEAD-box helicase 6(DDX6)
DDX5	DEAD-box helicase 5(DDX5)
ARHGEF26	Rho guanine nucleotide exchange factor 26(ARHGEF26)
KLHL15	kelch like family member 15(KLHL15)
YTHDC1	YTH domain containing 1(YTHDC1)
SLC1A2	solute carrier family 1 member 2(SLC1A2)
CACNA1C	calcium voltage-gated channel subunit alpha1 C(CACNA1C)
HIGD1A	HIG1 hypoxia inducible domain family member 1A(HIGD1A)
INAVA	innate immunity activator(INAVA)
FUT4	fucosyltransferase 4(FUT4)
VCPIP1	valosin containing protein interacting protein 1(VCPIP1)
FUT8	fucosyltransferase 8(FUT8)
KIF3B	kinesin family member 3B(KIF3B)
TBC1D17	TBC1 domain family member 17(TBC1D17)
MORC2	MORC family CW-type zinc finger 2(MORC2)
NIBAN1	niban apoptosis regulator 1(NIBAN1)
ITPRID2	ITPR interacting domain containing 2(ITPRID2)
UBE2I	ubiquitin conjugating enzyme E2 I(UBE2I)
SYT1	synaptotagmin 1(SYT1)
DENND4B	DENN domain containing 4B(DENND4B)
PHF12	PHD finger protein 12(PHF12)
KLHL28	kelch like family member 28(KLHL28)
HMGA1	high mobility group AT-hook 1(HMGA1)
HMGA2	high mobility group AT-hook 2(HMGA2)
ZFHX4	zinc finger homeobox 4(ZFHX4)
IGF2R	insulin like growth factor 2 receptor(IGF2R)
PHOX2B	paired like homeobox 2B(PHOX2B)
TJAP1	tight junction associated protein 1(TJAP1)
UEVLD	UEV and lactate/malate dehyrogenase domains(UEVLD)
PAN2	poly(A) specific ribonuclease subunit PAN2(PAN2)
BMP3	bone morphogenetic protein 3(BMP3)
PAN3	poly(A) specific ribonuclease subunit PAN3(PAN3)
NASP	nuclear autoantigenic sperm protein(NASP)
MKRN1	makorin ring finger protein 1(MKRN1)
GNB4	G protein subunit beta 4(GNB4)
PHF13	PHD finger protein 13(PHF13)
NABP1	nucleic acid binding protein 1(NABP1)
TCF4	transcription factor 4(TCF4)
GNB5	G protein subunit beta 5(GNB5)
STT3B	STT3 oligosaccharyltransferase complex catalytic subunit B(STT3B)
AMOTL1	angiomotin like 1(AMOTL1)
MXD1	MAX dimerization protein 1(MXD1)
DNAL1	dynein axonemal light chain 1(DNAL1)
PICALM	phosphatidylinositol binding clathrin assembly protein(PICALM)
RBM27	RNA binding motif protein 27(RBM27)
PHTF2	putative homeodomain transcription factor 2(PHTF2)
TNFAIP8	TNF alpha induced protein 8(TNFAIP8)
DYRK2	dual specificity tyrosine phosphorylation regulated kinase 2(DYRK2)
DDX3X	DEAD-box helicase 3 X-linked(DDX3X)
CHD9	chromodomain helicase DNA binding protein 9(CHD9)
HMGB3	high mobility group box 3(HMGB3)
ATP2A2	ATPase sarcoplasmic/endoplasmic reticulum Ca2+ transporting 2(ATP2A2)
LAMC1	laminin subunit gamma 1(LAMC1)
PPP1R9A	protein phosphatase 1 regulatory subunit 9A(PPP1R9A)
TENT4A	terminal nucleotidyltransferase 4A(TENT4A)
RND3	Rho family GTPase 3(RND3)
TENT4B	terminal nucleotidyltransferase 4B(TENT4B)
AFF4	ALF transcription elongation factor 4(AFF4)
AFF1	ALF transcription elongation factor 1(AFF1)
FYCO1	FYVE and coiled-coil domain autophagy adaptor 1(FYCO1)
LASP1	LIM and SH3 protein 1(LASP1)
BCL7A	BAF chromatin remodeling complex subunit BCL7A(BCL7A)
UQCRFS1	ubiquinol-cytochrome c reductase, Rieske iron-sulfur polypeptide 1(UQCRFS1)
LRRFIP2	LRR binding FLII interacting protein 2(LRRFIP2)
ZNF385A	zinc finger protein 385A(ZNF385A)
SUN2	Sad1 and UNC84 domain containing 2(SUN2)
NAA30	N-alpha-acetyltransferase 30, NatC catalytic subunit(NAA30)
TGIF2	TGFB induced factor homeobox 2(TGIF2)
DYNLT1	dynein light chain Tctex-type 1(DYNLT1)
EED	embryonic ectoderm development(EED)
MMP2	matrix metallopeptidase 2(MMP2)
ETV1	ETS variant transcription factor 1(ETV1)
TENT5A	terminal nucleotidyltransferase 5A(TENT5A)
MASTL	microtubule associated serine/threonine kinase like(MASTL)
YWHAZ	tyrosine 3-monooxygenase/tryptophan 5-monooxygenase activation protein zeta(YWHAZ)
TENT5C	terminal nucleotidyltransferase 5C(TENT5C)
TBC1D1	TBC1 domain family member 1(TBC1D1)
VCAN	versican(VCAN)
CREB1	cAMP responsive element binding protein 1(CREB1)
UBE2R2	ubiquitin conjugating enzyme E2 R2(UBE2R2)
NUP50	nucleoporin 50(NUP50)
IRF1	interferon regulatory factor 1(IRF1)
CRY2	cryptochrome circadian regulator 2(CRY2)
SPOPL	speckle type BTB/POZ protein like(SPOPL)
ZMYND11	zinc finger MYND-type containing 11(ZMYND11)
NAT8L	N-acetyltransferase 8 like(NAT8L)
RALA	RAS like proto-oncogene A(RALA)
RRN3	RRN3 homolog, RNA polymerase I transcription factor(RRN3)
RALB	RAS like proto-oncogene B(RALB)
LAMA2	laminin subunit alpha 2(LAMA2)
HMGCR	3-hydroxy-3-methylglutaryl-CoA reductase(HMGCR)
ABHD17C	abhydrolase domain containing 17C, depalmitoylase(ABHD17C)
RNF4	ring finger protein 4(RNF4)
CLCN3	chloride voltage-gated channel 3(CLCN3)
ACVR1B	activin A receptor type 1B(ACVR1B)
AGPAT3	1-acylglycerol-3-phosphate O-acyltransferase 3(AGPAT3)
AURKA	aurora kinase A(AURKA)
TNKS2	tankyrase 2(TNKS2)
RAB40C	RAB40C, member RAS oncogene family(RAB40C)
SPOCK2	SPARC (osteonectin), cwcv and kazal like domains proteoglycan 2(SPOCK2)
MKNK2	MAPK interacting serine/threonine kinase 2(MKNK2)
MXI1	MAX interactor 1, dimerization protein(MXI1)
NAA25	N-alpha-acetyltransferase 25, NatB auxiliary subunit(NAA25)
BNIP2	BCL2 interacting protein 2(BNIP2)
RALY	RALY heterogeneous nuclear ribonucleoprotein(RALY)
NUP43	nucleoporin 43(NUP43)
VHL	von Hippel-Lindau tumor suppressor(VHL)
FBRS	fibrosin(FBRS)
ARFGEF1	ADP ribosylation factor guanine nucleotide exchange factor 1(ARFGEF1)
GALNT7	polypeptide N-acetylgalactosaminyltransferase 7(GALNT7)
RRM2	ribonucleotide reductase regulatory subunit M2(RRM2)
EYA3	EYA transcriptional coactivator and phosphatase 3(EYA3)
ATP2B1	ATPase plasma membrane Ca2+ transporting 1(ATP2B1)
MAPK14	mitogen-activated protein kinase 14(MAPK14)
USF2	upstream transcription factor 2, c-fos interacting(USF2)
ACVR2A	activin A receptor type 2A(ACVR2A)
MAPK10	mitogen-activated protein kinase 10(MAPK10)
REST	RE1 silencing transcription factor(REST)
ACTC1	actin alpha cardiac muscle 1(ACTC1)
TEF	TEF transcription factor, PAR bZIP family member(TEF)
CARM1	coactivator associated arginine methyltransferase 1(CARM1)
BMT2	base methyltransferase of 25S rRNA 2 homolog(BMT2)
KRAS	KRAS proto-oncogene, GTPase(KRAS)
NAA15	N-alpha-acetyltransferase 15, NatA auxiliary subunit(NAA15)
ASB3	ankyrin repeat and SOCS box containing 3(ASB3)
SNTB1	syntrophin beta 1(SNTB1)
SNTB2	syntrophin beta 2(SNTB2)
OTUD3	OTU deubiquitinase 3(OTUD3)
CNTFR	ciliary neurotrophic factor receptor(CNTFR)
EMC10	ER membrane protein complex subunit 10(EMC10)
BACH1	BTB domain and CNC homolog 1(BACH1)
FGFRL1	fibroblast growth factor receptor like 1(FGFRL1)
DCAF7	DDB1 and CUL4 associated factor 7(DCAF7)
ELK4	ETS transcription factor ELK4(ELK4)
HOXA9	homeobox A9(HOXA9)
MSANTD2	Myb/SANT DNA binding domain containing 2(MSANTD2)
CREB3L2	cAMP responsive element binding protein 3 like 2(CREB3L2)
STMN1	stathmin 1(STMN1)
CYP1B1	cytochrome P450 family 1 subfamily B member 1(CYP1B1)
AP1S1	adaptor related protein complex 1 subunit sigma 1(AP1S1)
ANKS1A	ankyrin repeat and sterile alpha motif domain containing 1A(ANKS1A)
CEP97	centrosomal protein 97(CEP97)
TSPYL2	TSPY like 2(TSPYL2)
MBNL1	muscleblind like splicing regulator 1(MBNL1)
PRKCH	protein kinase C eta(PRKCH)
NHLRC3	NHL repeat containing 3(NHLRC3)
GLCE	glucuronic acid epimerase(GLCE)
FNDC3B	fibronectin type III domain containing 3B(FNDC3B)
SOX11	SRY-box transcription factor 11(SOX11)
FNDC3A	fibronectin type III domain containing 3A(FNDC3A)
SOX12	SRY-box transcription factor 12(SOX12)
ATG14	autophagy related 14(ATG14)
GTPBP2	GTP binding protein 2(GTPBP2)
DKK3	dickkopf WNT signaling pathway inhibitor 3(DKK3)
ARMC1	armadillo repeat containing 1(ARMC1)
DYNC1LI2	dynein cytoplasmic 1 light intermediate chain 2(DYNC1LI2)
ADCY9	adenylate cyclase 9(ADCY9)
WDR82	WD repeat domain 82(WDR82)
HECW2	HECT, C2 and WW domain containing E3 ubiquitin protein ligase 2(HECW2)
RNF122	ring finger protein 122(RNF122)
SLAIN2	SLAIN motif family member 2(SLAIN2)
ATXN7L3B	ataxin 7 like 3B(ATXN7L3B)
VPS26A	VPS26 retromer complex component A(VPS26A)
ARPP19	cAMP regulated phosphoprotein 19(ARPP19)
GNS	glucosamine (N-acetyl)-6-sulfatase(GNS)
MTDH	metadherin(MTDH)
PCDHA5	protocadherin alpha 5(PCDHA5)
SSR1	signal sequence receptor subunit 1(SSR1)
PCDHA3	protocadherin alpha 3(PCDHA3)
PCDHA2	protocadherin alpha 2(PCDHA2)
ZNF148	zinc finger protein 148(ZNF148)
HOXC6	homeobox C6(HOXC6)
NAA50	N-alpha-acetyltransferase 50, NatE catalytic subunit(NAA50)
PRELID2	PRELI domain containing 2(PRELID2)
FZD3	frizzled class receptor 3(FZD3)
STARD13	StAR related lipid transfer domain containing 13(STARD13)
CDK19	cyclin dependent kinase 19(CDK19)
NDFIP1	Nedd4 family interacting protein 1(NDFIP1)
PLK2	polo like kinase 2(PLK2)
RDX	radixin(RDX)
NR1D2	nuclear receptor subfamily 1 group D member 2(NR1D2)
CDC6	cell division cycle 6(CDC6)
ELL2	elongation factor for RNA polymerase II 2(ELL2)
PHC3	polyhomeotic homolog 3(PHC3)
PEDS1-UBE2V1	PEDS1-UBE2V1 readthrough(PEDS1-UBE2V1)
FOSL1	FOS like 1, AP-1 transcription factor subunit(FOSL1)
TADA2B	transcriptional adaptor 2B(TADA2B)
SNAI1	snail family transcriptional repressor 1(SNAI1)
REL	REL proto-oncogene, NF-kB subunit(REL)
TNFSF9	TNF superfamily member 9(TNFSF9)
HBP1	HMG-box transcription factor 1(HBP1)
CPEB3	cytoplasmic polyadenylation element binding protein 3(CPEB3)
CPEB2	cytoplasmic polyadenylation element binding protein 2(CPEB2)
CPEB4	cytoplasmic polyadenylation element binding protein 4(CPEB4)
CDC42SE2	CDC42 small effector 2(CDC42SE2)
CDK16	cyclin dependent kinase 16(CDK16)
CDKN1A	cyclin dependent kinase inhibitor 1A(CDKN1A)
BTG2	BTG anti-proliferation factor 2(BTG2)
CDKN1B	cyclin dependent kinase inhibitor 1B(CDKN1B)
SETD7	SET domain containing 7, histone lysine methyltransferase(SETD7)
LPCAT1	lysophosphatidylcholine acyltransferase 1(LPCAT1)
SMG7	SMG7 nonsense mediated mRNA decay factor(SMG7)
CYB561D1	cytochrome b561 family member D1(CYB561D1)
PHF6	PHD finger protein 6(PHF6)
SLC6A4	solute carrier family 6 member 4(SLC6A4)
LFNG	LFNG O-fucosylpeptide 3-beta-N-acetylglucosaminyltransferase(LFNG)
TRIM8	tripartite motif containing 8(TRIM8)
DSTYK	dual serine/threonine and tyrosine protein kinase(DSTYK)
PIP4P1	phosphatidylinositol-4,5-bisphosphate 4-phosphatase 1(PIP4P1)
TRIM2	tripartite motif containing 2(TRIM2)
DENND11	DENN domain containing 11(DENND11)
PEA15	proliferation and apoptosis adaptor protein 15(PEA15)
ELOC	elongin C(ELOC)
WDR37	WD repeat domain 37(WDR37)
TET2	tet methylcytosine dioxygenase 2(TET2)
PAX3	paired box 3(PAX3)
COPZ1	COPI coat complex subunit zeta 1(COPZ1)
CIT	citron rho-interacting serine/threonine kinase(CIT)
BACE1	beta-secretase 1(BACE1)
NCOR2	nuclear receptor corepressor 2(NCOR2)
HADHB	hydroxyacyl-CoA dehydrogenase trifunctional multienzyme complex subunit beta(HADHB)
ITPKB	inositol-trisphosphate 3-kinase B(ITPKB)
KAT2B	lysine acetyltransferase 2B(KAT2B)
FAM210A	family with sequence similarity 210 member A(FAM210A)
ZEB2	zinc finger E-box binding homeobox 2(ZEB2)
ZEB1	zinc finger E-box binding homeobox 1(ZEB1)
MTF1	metal regulatory transcription factor 1(MTF1)
TET3	tet methylcytosine dioxygenase 3(TET3)
ZNF597	zinc finger protein 597(ZNF597)
PHLPP2	PH domain and leucine rich repeat protein phosphatase 2(PHLPP2)
GRAMD1B	GRAM domain containing 1B(GRAMD1B)
FIGN	fidgetin, microtubule severing factor(FIGN)
SRP72	signal recognition particle 72(SRP72)
GPAT4	glycerol-3-phosphate acyltransferase 4(GPAT4)
RNF138	ring finger protein 138(RNF138)
UBN2	ubinuclein 2(UBN2)
GCNT2	glucosaminyl (N-acetyl) transferase 2 (I blood group)(GCNT2)
ZNF106	zinc finger protein 106(ZNF106)
RPL15	ribosomal protein L15(RPL15)
ATP5MF-PTCD1	ATP5MF-PTCD1 readthrough(ATP5MF-PTCD1)
MBNL3	muscleblind like splicing regulator 3(MBNL3)
LDLR	low density lipoprotein receptor(LDLR)
RUNX1T1	RUNX1 partner transcriptional co-repressor 1(RUNX1T1)
FARP1	FERM, ARH/RhoGEF and pleckstrin domain protein 1(FARP1)
SEPTIN2	septin 2(SEPTIN2)
PCGF3	polycomb group ring finger 3(PCGF3)
C1ORF21	chromosome 1 open reading frame 21(C1orf21)
FAM104A	family with sequence similarity 104 member A(FAM104A)
TMEM154	transmembrane protein 154(TMEM154)
HIPK2	homeodomain interacting protein kinase 2(HIPK2)
ZNFX1	zinc finger NFX1-type containing 1(ZNFX1)
RYBP	RING1 and YY1 binding protein(RYBP)
ABI2	abl interactor 2(ABI2)
OSTM1	osteoclastogenesis associated transmembrane protein 1(OSTM1)
NFIA	nuclear factor I A(NFIA)
NFIB	nuclear factor I B(NFIB)
SMOC1	SPARC related modular calcium binding 1(SMOC1)
NFIC	nuclear factor I C(NFIC)
VMA21	vacuolar ATPase assembly factor VMA21(VMA21)
RLIM	ring finger protein, LIM domain interacting(RLIM)
CCDC71L	coiled-coil domain containing 71 like(CCDC71L)
ANKRD13C	ankyrin repeat domain 13C(ANKRD13C)
RAB3B	RAB3B, member RAS oncogene family(RAB3B)
PLXND1	plexin D1(PLXND1)
FMR1	fragile X messenger ribonucleoprotein 1(FMR1)
TUSC2	tumor suppressor 2, mitochondrial calcium regulator(TUSC2)
TMEM131L	transmembrane 131 like(TMEM131L)
FGF2	fibroblast growth factor 2(FGF2)
LCLAT1	lysocardiolipin acyltransferase 1(LCLAT1)
BZW1	basic leucine zipper and W2 domains 1(BZW1)
IPO7	importin 7(IPO7)
SLC8A1	solute carrier family 8 member A1(SLC8A1)
EDC3	enhancer of mRNA decapping 3(EDC3)
NPEPPS	aminopeptidase puromycin sensitive(NPEPPS)
SALL1	spalt like transcription factor 1(SALL1)
SALL3	spalt like transcription factor 3(SALL3)
CFL2	cofilin 2(CFL2)
SMARCAD1	SWI/SNF-related, matrix-associated actin-dependent regulator of chromatin, subfamily a, containing DEAD/H box 1(SMARCAD1)
ZNF566	zinc finger protein 566(ZNF566)
LZTS1	leucine zipper tumor suppressor 1(LZTS1)
PCDHAC1	protocadherin alpha subfamily C, 1(PCDHAC1)
PLS1	plastin 1(PLS1)
IFNAR2	interferon alpha and beta receptor subunit 2(IFNAR2)
MAP2K3	mitogen-activated protein kinase kinase 3(MAP2K3)
TLE4	TLE family member 4, transcriptional corepressor(TLE4)
MAGI1	membrane associated guanylate kinase, WW and PDZ domain containing 1(MAGI1)
ZNF562	zinc finger protein 562(ZNF562)
CSNK1G3	casein kinase 1 gamma 3(CSNK1G3)
TLE3	TLE family member 3, transcriptional corepressor(TLE3)
PNISR	PNN interacting serine and arginine rich protein(PNISR)
C8ORF58	chromosome 8 open reading frame 58(C8orf58)
RNF44	ring finger protein 44(RNF44)
CEP135	centrosomal protein 135(CEP135)
ANKRD46	ankyrin repeat domain 46(ANKRD46)
SEMA6D	semaphorin 6D(SEMA6D)
DIO1	iodothyronine deiodinase 1(DIO1)
GOLGA8J	golgin A8 family member J(GOLGA8J)
MITF	melanocyte inducing transcription factor(MITF)
RNF41	ring finger protein 41(RNF41)
HIC2	HIC ZBTB transcriptional repressor 2(HIC2)
RAB30	RAB30, member RAS oncogene family(RAB30)
CACNB4	calcium voltage-gated channel auxiliary subunit beta 4(CACNB4)
RAB34	RAB34, member RAS oncogene family(RAB34)
ANKRD40	ankyrin repeat domain 40(ANKRD40)
SREK1	splicing regulatory glutamic acid and lysine rich protein 1(SREK1)
TTPAL	alpha tocopherol transfer protein like(TTPAL)
CSNK1G1	casein kinase 1 gamma 1(CSNK1G1)
GLYR1	glyoxylate reductase 1 homolog(GLYR1)
IPPK	inositol-pentakisphosphate 2-kinase(IPPK)
CSF1R	colony stimulating factor 1 receptor(CSF1R)
DNMT1	DNA methyltransferase 1(DNMT1)
RAB5B	RAB5B, member RAS oncogene family(RAB5B)
CUL5	cullin 5(CUL5)
INSIG1	insulin induced gene 1(INSIG1)
ABHD2	abhydrolase domain containing 2, acylglycerol lipase(ABHD2)
CUL2	cullin 2(CUL2)
KRBOX4	KRAB box domain containing 4(KRBOX4)
HMBOX1	homeobox containing 1(HMBOX1)
UBR7	ubiquitin protein ligase E3 component n-recognin 7(UBR7)
BTBD3	BTB domain containing 3(BTBD3)
NACC1	nucleus accumbens associated 1(NACC1)
UBR5	ubiquitin protein ligase E3 component n-recognin 5(UBR5)
BTLA	B and T lymphocyte associated(BTLA)
PLXNA1	plexin A1(PLXNA1)
ABL2	ABL proto-oncogene 2, non-receptor tyrosine kinase(ABL2)
DVL3	dishevelled segment polarity protein 3(DVL3)
MCL1	MCL1 apoptosis regulator, BCL2 family member(MCL1)
MAP2K6	mitogen-activated protein kinase kinase 6(MAP2K6)
OSBPL9	oxysterol binding protein like 9(OSBPL9)
OSBPL8	oxysterol binding protein like 8(OSBPL8)
OSBPL3	oxysterol binding protein like 3(OSBPL3)
CYBRD1	cytochrome b reductase 1(CYBRD1)
BTBD7	BTB domain containing 7(BTBD7)
C6ORF120	chromosome 6 open reading frame 120(C6orf120)
CDK8	cyclin dependent kinase 8(CDK8)
CNOT7	CCR4-NOT transcription complex subunit 7(CNOT7)
CDK6	cyclin dependent kinase 6(CDK6)
SYNJ1	synaptojanin 1(SYNJ1)
REEP4	receptor accessory protein 4(REEP4)
COPS2	COP9 signalosome subunit 2(COPS2)
REEP3	receptor accessory protein 3(REEP3)
BCL3	BCL3 transcription coactivator(BCL3)
BCL2	BCL2 apoptosis regulator(BCL2)
PLEKHM1	pleckstrin homology and RUN domain containing M1(PLEKHM1)
NF1	neurofibromin 1(NF1)
MAP3K10	mitogen-activated protein kinase kinase kinase 10(MAP3K10)
NF2	NF2, moesin-ezrin-radixin like (MERLIN) tumor suppressor(NF2)
SERINC3	serine incorporator 3(SERINC3)
ZNF532	zinc finger protein 532(ZNF532)
EIF4G2	eukaryotic translation initiation factor 4 gamma 2(EIF4G2)
SERINC5	serine incorporator 5(SERINC5)
BCL2L1	BCL2 like 1(BCL2L1)
PLEKHF2	pleckstrin homology and FYVE domain containing 2(PLEKHF2)
ANKRD33B	ankyrin repeat domain 33B(ANKRD33B)
BMPR2	bone morphogenetic protein receptor type 2(BMPR2)
CCDC47	coiled-coil domain containing 47(CCDC47)
AMD1	adenosylmethionine decarboxylase 1(AMD1)
PPP6C	protein phosphatase 6 catalytic subunit(PPP6C)
DNMT3B	DNA methyltransferase 3 beta(DNMT3B)
TLK1	tousled like kinase 1(TLK1)
PHACTR2	phosphatase and actin regulator 2(PHACTR2)
HIF1AN	hypoxia inducible factor 1 subunit alpha inhibitor(HIF1AN)
TNPO1	transportin 1(TNPO1)
LBR	lamin B receptor(LBR)
PHACTR4	phosphatase and actin regulator 4(PHACTR4)
TRPC3	transient receptor potential cation channel subfamily C member 3(TRPC3)
HMGCS1	3-hydroxy-3-methylglutaryl-CoA synthase 1(HMGCS1)
CEMIP2	cell migration inducing hyaluronidase 2(CEMIP2)
SECISBP2L	SECIS binding protein 2 like(SECISBP2L)
DNMT3A	DNA methyltransferase 3 alpha(DNMT3A)
WIPI2	WD repeat domain, phosphoinositide interacting 2(WIPI2)
SMC1A	structural maintenance of chromosomes 1A(SMC1A)
TSN	translin(TSN)
PTBP3	polypyrimidine tract binding protein 3(PTBP3)
DNAJC3	DnaJ heat shock protein family (Hsp40) member C3(DNAJC3)
PTP4A1	protein tyrosine phosphatase 4A1(PTP4A1)
ESRP1	epithelial splicing regulatory protein 1(ESRP1)
CTDSP2	CTD small phosphatase 2(CTDSP2)
TRAF6	TNF receptor associated factor 6(TRAF6)
SOS1	SOS Ras/Rac guanine nucleotide exchange factor 1(SOS1)
NEMP1	nuclear envelope integral membrane protein 1(NEMP1)
CRK	CRK proto-oncogene, adaptor protein(CRK)
SOS2	SOS Ras/Rho guanine nucleotide exchange factor 2(SOS2)
SSX2IP	SSX family member 2 interacting protein(SSX2IP)
NFAT5	nuclear factor of activated T cells 5(NFAT5)
NUFIP2	nuclear FMR1 interacting protein 2(NUFIP2)
LUZP1	leucine zipper protein 1(LUZP1)
PLAG1	PLAG1 zinc finger(PLAG1)
VPS4B	vacuolar protein sorting 4 homolog B(VPS4B)
WBP4	WW domain binding protein 4(WBP4)
RNF38	ring finger protein 38(RNF38)
CEBPG	CCAAT enhancer binding protein gamma(CEBPG)
JAKMIP2	janus kinase and microtubule interacting protein 2(JAKMIP2)
C3ORF38	chromosome 3 open reading frame 38(C3orf38)
FBXL20	F-box and leucine rich repeat protein 20(FBXL20)
RAB21	RAB21, member RAS oncogene family(RAB21)
STOX2	storkhead box 2(STOX2)
POLR2D	RNA polymerase II subunit D(POLR2D)
RBBP6	RB binding protein 6, ubiquitin ligase(RBBP6)
FNIP1	folliculin interacting protein 1(FNIP1)
UGGT1	UDP-glucose glycoprotein glucosyltransferase 1(UGGT1)
NLGN4X	neuroligin 4 X-linked(NLGN4X)
SEMA4C	semaphorin 4C(SEMA4C)
DDHD1	DDHD domain containing 1(DDHD1)
KLF4	KLF transcription factor 4(KLF4)
OXR1	oxidation resistance 1(OXR1)
RAB10	RAB10, member RAS oncogene family(RAB10)
KLF7	KLF transcription factor 7(KLF7)
NIN	ninein(NIN)
KLF6	KLF transcription factor 6(KLF6)
PSAT1	phosphoserine aminotransferase 1(PSAT1)
IMPDH1	inosine monophosphate dehydrogenase 1(IMPDH1)
POLR3D	RNA polymerase III subunit D(POLR3D)
POLR3G	RNA polymerase III subunit G(POLR3G)
TLL1	tolloid like 1(TLL1)
TNRC6B	trinucleotide repeat containing adaptor 6B(TNRC6B)
GLTP	glycolipid transfer protein(GLTP)
APP	amyloid beta precursor protein(APP)
PANK3	pantothenate kinase 3(PANK3)
ARL6IP1	ADP ribosylation factor like GTPase 6 interacting protein 1(ARL6IP1)
PANK1	pantothenate kinase 1(PANK1)
DIXDC1	DIX domain containing 1(DIXDC1)
PPP2R2A	protein phosphatase 2 regulatory subunit Balpha(PPP2R2A)
GBA2	glucosylceramidase beta 2(GBA2)
KIAA0930	KIAA0930(KIAA0930)
RPS6KA3	ribosomal protein S6 kinase A3(RPS6KA3)
GOLGA3	golgin A3(GOLGA3)
RPS6KA5	ribosomal protein S6 kinase A5(RPS6KA5)
ZNF608	zinc finger protein 608(ZNF608)
CHEK1	checkpoint kinase 1(CHEK1)
GOLGA1	golgin A1(GOLGA1)
PDK4	pyruvate dehydrogenase kinase 4(PDK4)
KAT7	lysine acetyltransferase 7(KAT7)
CHAC1	ChaC glutathione specific gamma-glutamylcyclotransferase 1(CHAC1)
SOX4	SRY-box transcription factor 4(SOX4)
AGFG2	ArfGAP with FG repeats 2(AGFG2)
SOX5	SRY-box transcription factor 5(SOX5)
AGFG1	ArfGAP with FG repeats 1(AGFG1)
MTUS1	microtubule associated scaffold protein 1(MTUS1)
YOD1	YOD1 deubiquitinase(YOD1)
ACSL4	acyl-CoA synthetase long chain family member 4(ACSL4)
RUNX3	RUNX family transcription factor 3(RUNX3)
RUNX2	RUNX family transcription factor 2(RUNX2)
UHMK1	U2AF homology motif kinase 1(UHMK1)
TIAM1	TIAM Rac1 associated GEF 1(TIAM1)
KATNAL1	katanin catalytic subunit A1 like 1(KATNAL1)
XRN1	5'-3' exoribonuclease 1(XRN1)
PDE12	phosphodiesterase 12(PDE12)
RRAGD	Ras related GTP binding D(RRAGD)
RUBCNL	rubicon like autophagy enhancer(RUBCNL)
SIK1	salt inducible kinase 1(SIK1)
PLPP3	phospholipid phosphatase 3(PLPP3)
ZFPM2	zinc finger protein, FOG family member 2(ZFPM2)
STXBP1	syntaxin binding protein 1(STXBP1)
EIF5A2	eukaryotic translation initiation factor 5A2(EIF5A2)
DCUN1D1	defective in cullin neddylation 1 domain containing 1(DCUN1D1)
GSKIP	GSK3B interacting protein(GSKIP)
TEX261	testis expressed 261(TEX261)
NLK	nemo like kinase(NLK)
FXR1	FMR1 autosomal homolog 1(FXR1)
UGCG	UDP-glucose ceramide glucosyltransferase(UGCG)
NLN	neurolysin(NLN)
SPAST	spastin(SPAST)
PDCD10	programmed cell death 10(PDCD10)
MLEC	malectin(MLEC)
GSE1	Gse1 coiled-coil protein(GSE1)
ZRANB1	zinc finger RANBP2-type containing 1(ZRANB1)
BCL11B	BAF chromatin remodeling complex subunit BCL11B(BCL11B)
GDF5	growth differentiation factor 5(GDF5)
SRPK1	SRSF protein kinase 1(SRPK1)
SPART	spartin(SPART)
SESTD1	SEC14 and spectrin domain containing 1(SESTD1)
CCDC88C	coiled-coil domain containing 88C(CCDC88C)
CREBRF	CREB3 regulatory factor(CREBRF)
ANP32E	acidic nuclear phosphoprotein 32 family member E(ANP32E)
CCSER2	coiled-coil serine rich protein 2(CCSER2)
TMCC1	transmembrane and coiled-coil domain family 1(TMCC1)
TECPR2	tectonin beta-propeller repeat containing 2(TECPR2)
SLC22A7	solute carrier family 22 member 7(SLC22A7)
BAP1	BRCA1 associated protein 1(BAP1)
CDS2	CDP-diacylglycerol synthase 2(CDS2)
H2AX	H2A.X variant histone(H2AX)
MRS2	magnesium transporter MRS2(MRS2)
TRAM1	translocation associated membrane protein 1(TRAM1)
SLC44A1	solute carrier family 44 member 1(SLC44A1)
SH3KBP1	SH3 domain containing kinase binding protein 1(SH3KBP1)
GDI2	GDP dissociation inhibitor 2(GDI2)
NKAP	NFKB activating protein(NKAP)
RSF1	remodeling and spacing factor 1(RSF1)
MEOX2	mesenchyme homeobox 2(MEOX2)
TRAM2	translocation associated membrane protein 2(TRAM2)
LIMD2	LIM domain containing 2(LIMD2)
ZCCHC14	zinc finger CCHC-type containing 14(ZCCHC14)
XPO1	exportin 1(XPO1)
ZNF805	zinc finger protein 805(ZNF805)
SH3PXD2A	SH3 and PX domains 2A(SH3PXD2A)
XPO4	exportin 4(XPO4)
NKIRAS1	NFKB inhibitor interacting Ras like 1(NKIRAS1)
NKIRAS2	NFKB inhibitor interacting Ras like 2(NKIRAS2)
TMED5	transmembrane p24 trafficking protein 5(TMED5)
RALGPS2	Ral GEF with PH domain and SH3 binding motif 2(RALGPS2)
CDV3	CDV3 homolog(CDV3)
EDN1	endothelin 1(EDN1)
STRADB	STE20 related adaptor beta(STRADB)
HEG1	heart development protein with EGF like domains 1(HEG1)
TSC22D2	TSC22 domain family member 2(TSC22D2)
KREMEN1	kringle containing transmembrane protein 1(KREMEN1)
NME4	NME/NM23 nucleoside diphosphate kinase 4(NME4)
IL17RD	interleukin 17 receptor D(IL17RD)
ZDHHC16	zinc finger DHHC-type palmitoyltransferase 16(ZDHHC16)
ZDHHC17	zinc finger DHHC-type palmitoyltransferase 17(ZDHHC17)
SLC22A23	solute carrier family 22 member 23(SLC22A23)
PACS2	phosphofurin acidic cluster sorting protein 2(PACS2)
CNEP1R1	CTD nuclear envelope phosphatase 1 regulatory subunit 1(CNEP1R1)
RPUSD2	RNA pseudouridine synthase domain containing 2(RPUSD2)
CLDN12	claudin 12(CLDN12)
FAM20C	FAM20C golgi associated secretory pathway kinase(FAM20C)
MAPRE3	microtubule associated protein RP/EB family member 3(MAPRE3)
SGK3	serum/glucocorticoid regulated kinase family member 3(SGK3)
AMER1	APC membrane recruitment protein 1(AMER1)
MYCBP	MYC binding protein(MYCBP)
SLC20A1	solute carrier family 20 member 1(SLC20A1)
RGPD4	RANBP2 like and GRIP domain containing 4(RGPD4)
TRAK2	trafficking kinesin protein 2(TRAK2)
PURB	purine rich element binding protein B(PURB)
PURA	purine rich element binding protein A(PURA)
KIAA0513	KIAA0513(KIAA0513)
ZDHHC18	zinc finger DHHC-type palmitoyltransferase 18(ZDHHC18)
PDPR	pyruvate dehydrogenase phosphatase regulatory subunit(PDPR)
UBTD2	ubiquitin domain containing 2(UBTD2)
SHOC2	SHOC2 leucine rich repeat scaffold protein(SHOC2)
APBB2	amyloid beta precursor protein binding family B member 2(APBB2)
RANBP2	RAN binding protein 2(RANBP2)
SUZ12	SUZ12 polycomb repressive complex 2 subunit(SUZ12)
LMLN	leishmanolysin like peptidase(LMLN)
GDF11	growth differentiation factor 11(GDF11)
NFYB	nuclear transcription factor Y subunit beta(NFYB)
MTX3	metaxin 3(MTX3)
C1GALT1	core 1 synthase, glycoprotein-N-acetylgalactosamine 3-beta-galactosyltransferase 1(C1GALT1)
LHFPL2	LHFPL tetraspan subfamily member 2(LHFPL2)
SVIP	small VCP interacting protein(SVIP)
NR6A1	nuclear receptor subfamily 6 group A member 1(NR6A1)
PDP2	pyruvate dehydrogenase phosphatase catalytic subunit 2(PDP2)
DLC1	DLC1 Rho GTPase activating protein(DLC1)
CAPZA2	capping actin protein of muscle Z-line subunit alpha 2(CAPZA2)
RAB3GAP2	RAB3 GTPase activating non-catalytic protein subunit 2(RAB3GAP2)
TRIP12	thyroid hormone receptor interactor 12(TRIP12)
RAB9B	RAB9B, member RAS oncogene family(RAB9B)
GALNT16	polypeptide N-acetylgalactosaminyltransferase 16(GALNT16)
ARID4B	AT-rich interaction domain 4B(ARID4B)
LZIC	leucine zipper and CTNNBIP1 domain containing(LZIC)
ARHGAP35	Rho GTPase activating protein 35(ARHGAP35)
HOXA10	homeobox A10(HOXA10)
ARHGDIA	Rho GDP dissociation inhibitor alpha(ARHGDIA)
POGZ	pogo transposable element derived with ZNF domain(POGZ)
SACS	sacsin molecular chaperone(SACS)
TRAPPC14	trafficking protein particle complex subunit 14(TRAPPC14)
CMTR2	cap methyltransferase 2(CMTR2)
LIFR	LIF receptor subunit alpha(LIFR)
TSC1	TSC complex subunit 1(TSC1)
SELENON	selenoprotein N(SELENON)
MYCN	MYCN proto-oncogene, bHLH transcription factor(MYCN)
TBL1XR1	TBL1X/Y related 1(TBL1XR1)
DNAJC30	DnaJ heat shock protein family (Hsp40) member C30(DNAJC30)
EOGT	EGF domain specific O-linked N-acetylglucosamine transferase(EOGT)
COL4A5	collagen type IV alpha 5 chain(COL4A5)
JCAD	junctional cadherin 5 associated(JCAD)
PXK	PX domain containing serine/threonine kinase like(PXK)
ARHGAP19	Rho GTPase activating protein 19(ARHGAP19)
STK4	serine/threonine kinase 4(STK4)
ADIPOR2	adiponectin receptor 2(ADIPOR2)
DNAJC27	DnaJ heat shock protein family (Hsp40) member C27(DNAJC27)
ZFP36L2	ZFP36 ring finger protein like 2(ZFP36L2)
CAMSAP2	calmodulin regulated spectrin associated protein family member 2(CAMSAP2)
ZFP36L1	ZFP36 ring finger protein like 1(ZFP36L1)
ARHGAP12	Rho GTPase activating protein 12(ARHGAP12)
EFNB2	ephrin B2(EFNB2)
PODXL	podocalyxin like(PODXL)
ZMAT3	zinc finger matrin-type 3(ZMAT3)
C14ORF28	chromosome 14 open reading frame 28(C14orf28)
CLSPN	claspin(CLSPN)
RPRD1A	regulation of nuclear pre-mRNA domain containing 1A(RPRD1A)
LONRF1	LON peptidase N-terminal domain and ring finger 1(LONRF1)
PDZD8	PDZ domain containing 8(PDZD8)
SMAD2	SMAD family member 2(SMAD2)
SMAD1	SMAD family member 1(SMAD1)
CBX6	chromobox 6(CBX6)
ACBD5	acyl-CoA binding domain containing 5(ACBD5)
SMAD4	SMAD family member 4(SMAD4)
CBX5	chromobox 5(CBX5)
POU2F1	POU class 2 homeobox 1(POU2F1)
SMURF1	SMAD specific E3 ubiquitin protein ligase 1(SMURF1)
CPSF2	cleavage and polyadenylation specific factor 2(CPSF2)
HELZ	helicase with zinc finger(HELZ)
ESR1	estrogen receptor 1(ESR1)
SMAD5	SMAD family member 5(SMAD5)
LIN28B	lin-28 homolog B(LIN28B)
NR4A3	nuclear receptor subfamily 4 group A member 3(NR4A3)
LIN28A	lin-28 homolog A(LIN28A)
CAPRIN2	caprin family member 2(CAPRIN2)
SRPRA	SRP receptor subunit alpha(SRPRA)
BRWD1	bromodomain and WD repeat domain containing 1(BRWD1)
FGFR1	fibroblast growth factor receptor 1(FGFR1)
CREBZF	CREB/ATF bZIP transcription factor(CREBZF)
USP37	ubiquitin specific peptidase 37(USP37)
B4GALT1	beta-1,4-galactosyltransferase 1(B4GALT1)
DOCK3	dedicator of cytokinesis 3(DOCK3)
SOWAHC	sosondowah ankyrin repeat domain family member C(SOWAHC)
USP32	ubiquitin specific peptidase 32(USP32)
MIDEAS	mitotic deacetylase associated SANT domain protein(MIDEAS)
SLC2A3	solute carrier family 2 member 3(SLC2A3)
PKD2	polycystin 2, transient receptor potential cation channel(PKD2)
ELAVL2	ELAV like RNA binding protein 2(ELAVL2)
SPRED1	sprouty related EVH1 domain containing 1(SPRED1)
SENP5	SUMO specific peptidase 5(SENP5)
SIX4	SIX homeobox 4(SIX4)
TRPS1	transcriptional repressor GATA binding 1(TRPS1)
PDE4B	phosphodiesterase 4B(PDE4B)
FLOT2	flotillin 2(FLOT2)
KLF10	KLF transcription factor 10(KLF10)
USP47	ubiquitin specific peptidase 47(USP47)
KLF13	KLF transcription factor 13(KLF13)
DESI1	desumoylating isopeptidase 1(DESI1)
MARS2	methionyl-tRNA synthetase 2, mitochondrial(MARS2)
PDE4D	phosphodiesterase 4D(PDE4D)
AKTIP	AKT interacting protein(AKTIP)
ARAP2	ArfGAP with RhoGAP domain, ankyrin repeat and PH domain 2(ARAP2)
ARID1A	AT-rich interaction domain 1A(ARID1A)
ARID1B	AT-rich interaction domain 1B(ARID1B)
CKAP5	cytoskeleton associated protein 5(CKAP5)
TGFBR1	transforming growth factor beta receptor 1(TGFBR1)
TGFBR2	transforming growth factor beta receptor 2(TGFBR2)
RBL2	RB transcriptional corepressor like 2(RBL2)
TGFBR3	transforming growth factor beta receptor 3(TGFBR3)
IGDCC4	immunoglobulin superfamily DCC subclass member 4(IGDCC4)
RASA1	RAS p21 protein activator 1(RASA1)
CDH11	cadherin 11(CDH11)
THOP1	thimet oligopeptidase 1(THOP1)
B4GALT5	beta-1,4-galactosyltransferase 5(B4GALT5)
PDXK	pyridoxal kinase(PDXK)
C2ORF69	chromosome 2 open reading frame 69(C2orf69)
LEF1	lymphoid enhancer binding factor 1(LEF1)
NR2C2	nuclear receptor subfamily 2 group C member 2(NR2C2)
THBS1	thrombospondin 1(THBS1)
GNA13	G protein subunit alpha 13(GNA13)
PRRG4	proline rich and Gla domain 4(PRRG4)
RMND5A	required for meiotic nuclear division 5 homolog A(RMND5A)
ERBB4	erb-b2 receptor tyrosine kinase 4(ERBB4)
LEPROTL1	leptin receptor overlapping transcript like 1(LEPROTL1)
PRRG1	proline rich and Gla domain 1(PRRG1)
NRIP3	nuclear receptor interacting protein 3(NRIP3)
SNCG	synuclein gamma(SNCG)
MAPK1	mitogen-activated protein kinase 1(MAPK1)
LRIG3	leucine rich repeats and immunoglobulin like domains 3(LRIG3)
TENT2	terminal nucleotidyltransferase 2(TENT2)
LRIG2	leucine rich repeats and immunoglobulin like domains 2(LRIG2)
S100PBP	S100P binding protein(S100PBP)
USP24	ubiquitin specific peptidase 24(USP24)
POLQ	DNA polymerase theta(POLQ)
KDM4B	lysine demethylase 4B(KDM4B)
PTCD1	pentatricopeptide repeat domain 1(PTCD1)
TMEM30A	transmembrane protein 30A(TMEM30A)
SGTB	small glutamine rich tetratricopeptide repeat co-chaperone beta(SGTB)
CMTM4	CKLF like MARVEL transmembrane domain containing 4(CMTM4)
NAP1L1	nucleosome assembly protein 1 like 1(NAP1L1)
ARID3A	AT-rich interaction domain 3A(ARID3A)
ARID3B	AT-rich interaction domain 3B(ARID3B)
USP28	ubiquitin specific peptidase 28(USP28)
FMNL3	formin like 3(FMNL3)
H3-5	H3.5 histone(H3-5)
NEURL4	neuralized E3 ubiquitin protein ligase 4(NEURL4)
WEE1	WEE1 G2 checkpoint kinase(WEE1)
KANSL1	KAT8 regulatory NSL complex subunit 1(KANSL1)
RPS6KB1	ribosomal protein S6 kinase B1(RPS6KB1)
SCD	stearoyl-CoA desaturase(SCD)
ATP13A3	ATPase 13A3(ATP13A3)
LPIN1	lipin 1(LPIN1)
C5ORF51	Aliases for RAB7A Interacting MON1-CCZ1 Complex Subunit 1 (RIMOC1)
ZADH2	Aliases for Prostaglandin Reductase 3 (PTGR3)
FAM102A	Aliases for Estrogen-Induced Osteoclastogenesis Regulator 1 (EEIG1)
FAM126B	Aliases for Hyccin PI4KA Lipid Kinase Complex Subunit 2 (HYCC2)
UHRF1BP1	Aliases for Bridge-Like Lipid Transfer Protein Family Member 3A (BLTP3A)
C16orf72	Alias for HUWE1 Associated Protein Modifying Stress Responses (HAPSTR1)

## Sheet: shared  UP regulated proteins
From	Gene Name
NSUN4	NOP2/Sun RNA methyltransferase 4(NSUN4)
KLHL15	kelch like family member 15(KLHL15)
HM13	histocompatibility minor 13(HM13)
PARVB	parvin beta(PARVB)
CYB561D1	cytochrome b561 family member D1(CYB561D1)
TOMM40L	translocase of outer mitochondrial membrane 40 like(TOMM40L)
TGFBR2	transforming growth factor beta receptor 2(TGFBR2)
PPP1R9B	protein phosphatase 1 regulatory subunit 9B(PPP1R9B)
NFASC	neurofascin(NFASC)
LIN28A	lin-28 homolog A(LIN28A)
HEPHL1	hephaestin like 1(HEPHL1)
BCL6	BCL6 transcription repressor(BCL6)
CRY2	cryptochrome circadian regulator 2(CRY2)
ZNF449	zinc finger protein 449(ZNF449)
NF1	neurofibromin 1(NF1)
ANKFY1	ankyrin repeat and FYVE domain containing 1(ANKFY1)
KCTD15	potassium channel tetramerization domain containing 15(KCTD15)

## Sheet: DOWN proteins TV-unique 
From	Gene Name
OTUD4	OTU deubiquitinase 4(OTUD4)
RB1	RB transcriptional corepressor 1(RB1)
APP	amyloid beta precursor protein(APP)
CRCP	CGRP receptor component(CRCP)
GMFB	glia maturation factor beta(GMFB)
CCNT2	cyclin T2(CCNT2)
ARL6IP1	ADP ribosylation factor like GTPase 6 interacting protein 1(ARL6IP1)
CRTC1	CREB regulated transcription coactivator 1(CRTC1)
FGF2	fibroblast growth factor 2(FGF2)
ZFYVE1	zinc finger FYVE-type containing 1(ZFYVE1)
BZW1	basic leucine zipper and W2 domains 1(BZW1)
ETS1	ETS proto-oncogene 1, transcription factor(ETS1)
PCMT1	protein-L-isoaspartate (D-aspartate) O-methyltransferase(PCMT1)
CDH5	cadherin 5(CDH5)
ZFYVE26	zinc finger FYVE-type containing 26(ZFYVE26)
LSM11	LSM11, U7 small nuclear RNA associated(LSM11)
CCND2	cyclin D2(CCND2)
ALCAM	activated leukocyte cell adhesion molecule(ALCAM)
C19ORF54	chromosome 19 open reading frame 54(C19orf54)
MPRIP	myosin phosphatase Rho interacting protein(MPRIP)
PAPOLG	poly(A) polymerase gamma(PAPOLG)
POGZ	pogo transposable element derived with ZNF domain(POGZ)
CHEK1	checkpoint kinase 1(CHEK1)
ENPP2	ectonucleotide pyrophosphatase/phosphodiesterase 2(ENPP2)
KIF21A	kinesin family member 21A(KIF21A)
ANKS1A	ankyrin repeat and sterile alpha motif domain containing 1A(ANKS1A)
IL6R	interleukin 6 receptor(IL6R)
MAP3K4	mitogen-activated protein kinase kinase kinase 4(MAP3K4)
KPNA1	karyopherin subunit alpha 1(KPNA1)
PSKH1	protein serine kinase H1(PSKH1)
TMEM178B	transmembrane protein 178B(TMEM178B)
ARRDC3	arrestin domain containing 3(ARRDC3)
ATG9A	autophagy related 9A(ATG9A)
DYRK1A	dual specificity tyrosine phosphorylation regulated kinase 1A(DYRK1A)
LIFR	LIF receptor subunit alpha(LIFR)
ZBTB34	zinc finger and BTB domain containing 34(ZBTB34)
DICER1	dicer 1, ribonuclease III(DICER1)
HCFC2	host cell factor C2(HCFC2)
PABIR2	PABIR family member 2(PABIR2)
CDC25A	cell division cycle 25A(CDC25A)
TMEM135	transmembrane protein 135(TMEM135)
MYCN	MYCN proto-oncogene, bHLH transcription factor(MYCN)
CCNE2	cyclin E2(CCNE2)
CCNE1	cyclin E1(CCNE1)
TBL1XR1	TBL1X/Y related 1(TBL1XR1)
SRSF2	serine and arginine rich splicing factor 2(SRSF2)
UBE2V1	ubiquitin conjugating enzyme E2 V1(UBE2V1)
OBI1	ORC ubiquitin ligase 1(OBI1)
ZNF275	zinc finger protein 275(ZNF275)
YTHDC1	YTH domain containing 1(YTHDC1)
EIF5A2	eukaryotic translation initiation factor 5A2(EIF5A2)
EFNB2	ephrin B2(EFNB2)
BCL2L13	BCL2 like 13(BCL2L13)
SBNO1	strawberry notch homolog 1(SBNO1)
BAG4	BAG cochaperone 4(BAG4)
LDHA	lactate dehydrogenase A(LDHA)
ATXN1	ataxin 1(ATXN1)
PPARGC1A	PPARG coactivator 1 alpha(PPARGC1A)
SMAD2	SMAD family member 2(SMAD2)
PRNP	prion protein(PRNP)
STARD13	StAR related lipid transfer domain containing 13(STARD13)
SMAD4	SMAD family member 4(SMAD4)
SMURF1	SMAD specific E3 ubiquitin protein ligase 1(SMURF1)
HMGA2	high mobility group AT-hook 2(HMGA2)
ESR1	estrogen receptor 1(ESR1)
QKI	QKI, KH domain containing RNA binding(QKI)
PEDS1-UBE2V1	PEDS1-UBE2V1 readthrough(PEDS1-UBE2V1)
FOSL1	FOS like 1, AP-1 transcription factor subunit(FOSL1)
BMP3	bone morphogenetic protein 3(BMP3)
CDK6	cyclin dependent kinase 6(CDK6)
NASP	nuclear autoantigenic sperm protein(NASP)
AGO1	argonaute RISC component 1(AGO1)
CREBRF	CREB3 regulatory factor(CREBRF)
AAK1	AP2 associated kinase 1(AAK1)
BCL2	BCL2 apoptosis regulator(BCL2)
TAB3	TGF-beta activated kinase 1 (MAP3K7) binding protein 3(TAB3)
MAFK	MAF bZIP transcription factor K(MAFK)
BRWD1	bromodomain and WD repeat domain containing 1(BRWD1)
MXD1	MAX dimerization protein 1(MXD1)
CPEB3	cytoplasmic polyadenylation element binding protein 3(CPEB3)
AVL9	AVL9 cell migration associated(AVL9)
ZNF652	zinc finger protein 652(ZNF652)
NFE2L1	NFE2 like bZIP transcription factor 1(NFE2L1)
BCL2L2	BCL2 like 2(BCL2L2)
CPEB4	cytoplasmic polyadenylation element binding protein 4(CPEB4)
SETD5	SET domain containing 5(SETD5)
C2ORF42	chromosome 2 open reading frame 42(C2orf42)
ANKRD33B	ankyrin repeat domain 33B(ANKRD33B)
PPP1R11	protein phosphatase 1 regulatory inhibitor subunit 11(PPP1R11)
SUV39H1	SUV39H1 histone lysine methyltransferase(SUV39H1)
AMD1	adenosylmethionine decarboxylase 1(AMD1)
BRCA1	BRCA1 DNA repair associated(BRCA1)
JPH1	junctophilin 1(JPH1)
MECP2	methyl-CpG binding protein 2(MECP2)
MFSD9	major facilitator superfamily domain containing 9(MFSD9)
DSTYK	dual serine/threonine and tyrosine protein kinase(DSTYK)
YWHAQ	tyrosine 3-monooxygenase/tryptophan 5-monooxygenase activation protein theta(YWHAQ)
DBT	dihydrolipoamide branched chain transacylase E2(DBT)
PHACTR2	phosphatase and actin regulator 2(PHACTR2)
ITGB8	integrin subunit beta 8(ITGB8)
ARIH1	ariadne RBR E3 ubiquitin protein ligase 1(ARIH1)
ELOC	elongin C(ELOC)
LBR	lamin B receptor(LBR)
ZNF385A	zinc finger protein 385A(ZNF385A)
ACTR2	actin related protein 2(ACTR2)
CDV3	CDV3 homolog(CDV3)
DNMT3A	DNA methyltransferase 3 alpha(DNMT3A)
TET2	tet methylcytosine dioxygenase 2(TET2)
WIPI2	WD repeat domain, phosphoinositide interacting 2(WIPI2)
ZDHHC16	zinc finger DHHC-type palmitoyltransferase 16(ZDHHC16)
COPZ1	COPI coat complex subunit zeta 1(COPZ1)
TSN	translin(TSN)
TGFBR3	transforming growth factor beta receptor 3(TGFBR3)
TBC1D1	TBC1 domain family member 1(TBC1D1)
WAC	WW domain containing adaptor with coiled-coil(WAC)
GAS1	growth arrest specific 1(GAS1)
ITGA6	integrin subunit alpha 6(ITGA6)
MET	MET proto-oncogene, receptor tyrosine kinase(MET)
PDXK	pyridoxal kinase(PDXK)
LUZP1	leucine zipper protein 1(LUZP1)
PLAG1	PLAG1 zinc finger(PLAG1)
VPS4A	vacuolar protein sorting 4 homolog A(VPS4A)
HMGCR	3-hydroxy-3-methylglutaryl-CoA reductase(HMGCR)
PPM1D	protein phosphatase, Mg2+/Mn2+ dependent 1D(PPM1D)
PURA	purine rich element binding protein A(PURA)
STOX2	storkhead box 2(STOX2)
C15ORF39	chromosome 15 open reading frame 39(C15orf39)
CDC37L1	cell division cycle 37 like 1, HSP90 cochaperone(CDC37L1)
SNCG	synuclein gamma(SNCG)
SHOC2	SHOC2 leucine rich repeat scaffold protein(SHOC2)
E2F3	E2F transcription factor 3(E2F3)
VHL	von Hippel-Lindau tumor suppressor(VHL)
DRAM2	DNA damage regulated autophagy modulator 2(DRAM2)
MAP3K2	mitogen-activated protein kinase kinase kinase 2(MAP3K2)
NFYB	nuclear transcription factor Y subunit beta(NFYB)
PCGF3	polycomb group ring finger 3(PCGF3)
STAT3	signal transducer and activator of transcription 3(STAT3)
ACVR2A	activin A receptor type 2A(ACVR2A)
MIB1	MIB E3 ubiquitin protein ligase 1(MIB1)
PLEKHA8	pleckstrin homology domain containing A8(PLEKHA8)
VEGFA	vascular endothelial growth factor A(VEGFA)
NOL4L	nucleolar protein 4 like(NOL4L)
AXL	AXL receptor tyrosine kinase(AXL)
ETNK1	ethanolamine kinase 1(ETNK1)
TAOK1	TAO kinase 1(TAOK1)
SERBP1	SERPINE1 mRNA binding protein 1(SERBP1)
KRAS	KRAS proto-oncogene, GTPase(KRAS)
TNRC6B	trinucleotide repeat containing adaptor 6B(TNRC6B)

## Sheet: UP proteins TV-unique
From	Gene Name
HIP1	huntingtin interacting protein 1(HIP1)
TUSC2	tumor suppressor 2, mitochondrial calcium regulator(TUSC2)
MIDEAS	mitotic deacetylase associated SANT domain protein(MIDEAS)
RASEF	RAS and EF-hand domain containing(RASEF)
ZBTB20	zinc finger and BTB domain containing 20(ZBTB20)
HNRNPU	heterogeneous nuclear ribonucleoprotein U(HNRNPU)
TNFAIP1	TNF alpha induced protein 1(TNFAIP1)
LCLAT1	lysocardiolipin acyltransferase 1(LCLAT1)
RAB22A	RAB22A, member RAS oncogene family(RAB22A)
ELK4	ETS transcription factor ELK4(ELK4)
SPRED1	sprouty related EVH1 domain containing 1(SPRED1)
CDH4	cadherin 4(CDH4)
GJA1	gap junction protein alpha 1(GJA1)
ZFYVE26	zinc finger FYVE-type containing 26(ZFYVE26)
CCND2	cyclin D2(CCND2)
SH3PXD2A	SH3 and PX domains 2A(SH3PXD2A)
SPTLC3	serine palmitoyltransferase long chain base subunit 3(SPTLC3)
PSD3	pleckstrin and Sec7 domain containing 3(PSD3)
ANKFY1	ankyrin repeat and FYVE domain containing 1(ANKFY1)
SAMD12	sterile alpha motif domain containing 12(SAMD12)
H3-3B	H3.3 histone B(H3-3B)
ZCCHC24	zinc finger CCHC-type containing 24(ZCCHC24)
MBNL1	muscleblind like splicing regulator 1(MBNL1)
DUSP2	dual specificity phosphatase 2(DUSP2)
IGFBP5	insulin like growth factor binding protein 5(IGFBP5)
CSNK2A1	casein kinase 2 alpha 1(CSNK2A1)
TSTD2	thiosulfate sulfurtransferase like domain containing 2(TSTD2)
TPM3	tropomyosin 3(TPM3)
SSR2	signal sequence receptor subunit 2(SSR2)
CTNNBIP1	catenin beta interacting protein 1(CTNNBIP1)
KREMEN1	kringle containing transmembrane protein 1(KREMEN1)
ELOVL6	ELOVL fatty acid elongase 6(ELOVL6)
YOD1	YOD1 deubiquitinase(YOD1)
DUSP6	dual specificity phosphatase 6(DUSP6)
SUMF2	sulfatase modifying factor 2(SUMF2)
SLC22A23	solute carrier family 22 member 23(SLC22A23)
CREB1	cAMP responsive element binding protein 1(CREB1)
RABEP1	rabaptin, RAB GTPase binding effector protein 1(RABEP1)
GAN	gigaxonin(GAN)
NUP50	nucleoporin 50(NUP50)
MAP1B	microtubule associated protein 1B(MAP1B)
POLR1G	RNA polymerase I subunit G(POLR1G)
PPIB	peptidylprolyl isomerase B(PPIB)
NFAT5	nuclear factor of activated T cells 5(NFAT5)
SAR1B	secretion associated Ras related GTPase 1B(SAR1B)
CUL3	cullin 3(CUL3)
DCUN1D1	defective in cullin neddylation 1 domain containing 1(DCUN1D1)
SLAIN2	SLAIN motif family member 2(SLAIN2)
TEX261	testis expressed 261(TEX261)
BAZ2A	bromodomain adjacent to zinc finger domain 2A(BAZ2A)
NR2C2	nuclear receptor subfamily 2 group C member 2(NR2C2)
PALM2AKAP2	PALM2 and AKAP2 fusion(PALM2AKAP2)
KIAA0513	KIAA0513(KIAA0513)
ORC4	origin recognition complex subunit 4(ORC4)
SBNO1	strawberry notch homolog 1(SBNO1)
PPP3R1	protein phosphatase 3 regulatory subunit B, alpha(PPP3R1)
HMBOX1	homeobox containing 1(HMBOX1)
ATXN1	ataxin 1(ATXN1)
RAB11FIP1	RAB11 family interacting protein 1(RAB11FIP1)
TNKS2	tankyrase 2(TNKS2)
DPP8	dipeptidyl peptidase 8(DPP8)
SPOP	speckle type BTB/POZ protein(SPOP)
STX6	syntaxin 6(STX6)
DVL3	dishevelled segment polarity protein 3(DVL3)
TPPP	tubulin polymerization promoting protein(TPPP)
MBNL3	muscleblind like splicing regulator 3(MBNL3)
SLC25A22	solute carrier family 25 member 22(SLC25A22)
PAK2	p21 (RAC1) activated kinase 2(PAK2)
SRSF11	serine and arginine rich splicing factor 11(SRSF11)
WDTC1	WD and tetratricopeptide repeats 1(WDTC1)
GDF11	growth differentiation factor 11(GDF11)
MYEF2	myelin expression factor 2(MYEF2)
POU2F1	POU class 2 homeobox 1(POU2F1)
GALNT3	polypeptide N-acetylgalactosaminyltransferase 3(GALNT3)
CADM2	cell adhesion molecule 2(CADM2)
MBD2	methyl-CpG binding domain protein 2(MBD2)
NR2F2	nuclear receptor subfamily 2 group F member 2(NR2F2)
ESR1	estrogen receptor 1(ESR1)
IGF2R	insulin like growth factor 2 receptor(IGF2R)
SEPTIN7	septin 7(SEPTIN7)
NFIB	nuclear factor I B(NFIB)
SMOC1	SPARC related modular calcium binding 1(SMOC1)
TAOK1	TAO kinase 1(TAOK1)
MKRN1	makorin ring finger protein 1(MKRN1)
BCL2	BCL2 apoptosis regulator(BCL2)
CREBRF	CREB3 regulatory factor(CREBRF)
PHF13	PHD finger protein 13(PHF13)
CENPO	centromere protein O(CENPO)
SUGT1	SGT1 homolog, MIS12 kinetochore complex assembly cochaperone(SUGT1)
PLCD3	phospholipase C delta 3(PLCD3)
SERINC3	serine incorporator 3(SERINC3)
MIXL1	Mix paired-like homeobox(MIXL1)
SNTB1	syntrophin beta 1(SNTB1)

## Sheet: DOWN proteins P. bivia-unique
From	Gene Name
PPP1R11	protein phosphatase 1 regulatory inhibitor subunit 11(PPP1R11)
ERBB4	erb-b2 receptor tyrosine kinase 4(ERBB4)
CCDC6	coiled-coil domain containing 6(CCDC6)

## Sheet: UP proteins P. bivia-unique
From	Gene Name
ANKRD13C	ankyrin repeat domain 13C(ANKRD13C)
BTG2	BTG anti-proliferation factor 2(BTG2)
CDKN1A	cyclin dependent kinase inhibitor 1A(CDKN1A)
UBXN2A	UBX domain protein 2A(UBXN2A)
LZIC	leucine zipper and CTNNBIP1 domain containing(LZIC)
FNBP1L	formin binding protein 1 like(FNBP1L)
FGF1	fibroblast growth factor 1(FGF1)
ARHGAP35	Rho GTPase activating protein 35(ARHGAP35)
SCAMP5	secretory carrier membrane protein 5(SCAMP5)
ZC3H12C	zinc finger CCCH-type containing 12C(ZC3H12C)
LAPTM4A	lysosomal protein transmembrane 4 alpha(LAPTM4A)
ZFYVE26	zinc finger FYVE-type containing 26(ZFYVE26)
AKAP11	A-kinase anchoring protein 11(AKAP11)
CFL2	cofilin 2(CFL2)
AKT3	AKT serine/threonine kinase 3(AKT3)
TIMP2	TIMP metallopeptidase inhibitor 2(TIMP2)
ENPP5	ectonucleotide pyrophosphatase/phosphodiesterase family member 5(ENPP5)
ZNF202	zinc finger protein 202(ZNF202)
AGFG2	ArfGAP with FG repeats 2(AGFG2)
EPHB3	EPH receptor B3(EPHB3)
EPHA4	EPH receptor A4(EPHA4)
CNOT6L	CCR4-NOT transcription complex subunit 6 like(CNOT6L)
NHLRC3	NHL repeat containing 3(NHLRC3)
MINK1	misshapen like kinase 1(MINK1)
GAB1	GRB2 associated binding protein 1(GAB1)
FRS2	fibroblast growth factor receptor substrate 2(FRS2)
ZBTB33	zinc finger and BTB domain containing 33(ZBTB33)
MASTL	microtubule associated serine/threonine kinase like(MASTL)
RUNX3	RUNX family transcription factor 3(RUNX3)
EMSY	EMSY transcriptional repressor, BRCA2 interacting(EMSY)
PGM2L1	phosphoglucomutase 2 like 1(PGM2L1)
MOSMO	modulator of smoothened(MOSMO)
TXLNA	taxilin alpha(TXLNA)
FRMD6	FERM domain containing 6(FRMD6)
CREB1	cAMP responsive element binding protein 1(CREB1)
RRAGD	Ras related GTP binding D(RRAGD)
RUFY2	RUN and FYVE domain containing 2(RUFY2)
CMPK1	cytidine/uridine monophosphate kinase 1(CMPK1)
MAPRE3	microtubule associated protein RP/EB family member 3(MAPRE3)
PLEKHO2	pleckstrin homology domain containing O2(PLEKHO2)
TTPAL	alpha tocopherol transfer protein like(TTPAL)
SLC27A4	solute carrier family 27 member 4(SLC27A4)
PAFAH1B1	platelet activating factor acetylhydrolase 1b regulatory subunit 1(PAFAH1B1)
PXK	PX domain containing serine/threonine kinase like(PXK)
ATL3	atlastin GTPase 3(ATL3)
PDE1B	phosphodiesterase 1B(PDE1B)
KLHL15	kelch like family member 15(KLHL15)
ABHD2	abhydrolase domain containing 2, acylglycerol lipase(ABHD2)
EIF5A2	eukaryotic translation initiation factor 5A2(EIF5A2)
TPRG1L	tumor protein p63 regulated 1 like(TPRG1L)
XIAP	X-linked inhibitor of apoptosis(XIAP)
FBXO48	F-box protein 48(FBXO48)
DNAJC27	DnaJ heat shock protein family (Hsp40) member C27(DNAJC27)
KIAA0513	KIAA0513(KIAA0513)
ATXN1	ataxin 1(ATXN1)
ANKH	ANKH inorganic pyrophosphate transport regulator(ANKH)
PRR14L	proline rich 14 like(PRR14L)
TMEM127	transmembrane protein 127(TMEM127)
ORMDL3	ORMDL sphingolipid biosynthesis regulator 3(ORMDL3)
EIF4H	eukaryotic translation initiation factor 4H(EIF4H)
STX6	syntaxin 6(STX6)
PLXNA1	plexin A1(PLXNA1)
MCL1	MCL1 apoptosis regulator, BCL2 family member(MCL1)
ACBD5	acyl-CoA binding domain containing 5(ACBD5)
HNRNPA3	heterogeneous nuclear ribonucleoprotein A3(HNRNPA3)
SEPTIN2	septin 2(SEPTIN2)
FEM1B	fem-1 homolog B(FEM1B)
TRAPPC10	trafficking protein particle complex subunit 10(TRAPPC10)
FOXJ3	forkhead box J3(FOXJ3)
PTPN12	protein tyrosine phosphatase non-receptor type 12(PTPN12)
SMAD7	SMAD family member 7(SMAD7)
FBXO31	F-box protein 31(FBXO31)
WEE1	WEE1 G2 checkpoint kinase(WEE1)
GID4	GID complex subunit 4 homolog(GID4)
OSTM1	osteoclastogenesis associated transmembrane protein 1(OSTM1)
AGO1	argonaute RISC component 1(AGO1)
SMOC1	SPARC related modular calcium binding 1(SMOC1)
MKRN1	makorin ring finger protein 1(MKRN1)
AAK1	AP2 associated kinase 1(AAK1)
RLIM	ring finger protein, LIM domain interacting(RLIM)
POLR3G	RNA polymerase III subunit G(POLR3G)
CCSER2	coiled-coil serine rich protein 2(CCSER2)
TNRC6B	trinucleotide repeat containing adaptor 6B(TNRC6B)
