# Supplementary material for: The microRNA Cargo of Human Vaginal Extracellular Vesicles Differentiates Parasitic and Pathobiont Infections from Colonization by Homeostatic Bacteria
Source: Microorganisms. 2023 Feb 21;11(3):551. doi: 10.3390/microorganisms11030551 (PMC10054151; doi:10.3390/microorganisms11030551)
Supplement: Supplementary file 1 [file microorganisms-11-00551-s001.zip › supplemental_info_final-20230221/Table S4 KEGG tissues shared Tv-Pb UP_miRNA.xlsx]

## Sheet: enrichment KEGG shared UP
#term ID	term description	observed gene count	background gene count	strength	false discovery rate	matching proteins in your network (IDs)	matching proteins in your network (labels)
hsa05206	MicroRNAs in cancer	57	160	0.77	1.3e-20	9606.ENSP00000212015,9606.ENSP00000215832,9606.ENSP00000216373,9606.ENSP00000227507,9606.ENSP00000228872,9606.ENSP00000244745,9606.ENSP00000256078,9606.ENSP00000257290,9606.ENSP00000260356,9606.ENSP00000261254,9606.ENSP00000261799,9606.ENSP00000262643,9606.ENSP00000262904,9606.ENSP00000263967,9606.ENSP00000264657,9606.ENSP00000264709,9606.ENSP00000265734,9606.ENSP00000290341,9606.ENSP00000300574,…	SIRT1,MAPK1,SOS2,CCND1,CDKN1B,SOX4,KRAS,PDGFRA,THBS1,CCND2,PDGFRB,CCNE1,E2F3,PIK3CA,STAT3,DNMT3A,CDK6,IGF2BP1,CRK,CDC25A,DDIT4,MET,DNMT3B,SOCS1,PDGFB,E2F1,BMF,UBE2I,DNMT1,ZEB1,E2F2,MDM4,MCL1,NRAS,PTEN,BMPR2,FSCN1,TRIM71,BCL2L11,BCL2,RDX,ZFPM2,CDKN1A,SOS1,STMN1,PIK3R1,CCNE2,IKBKB,DICER1,FZD3,HMGA2,ITGB3,ZEB2,CYP1B1,VEGFA,RPS6KA5,FOXP1
hsa05200	Pathways in cancer	85	517	0.44	7.78e-13	9606.ENSP00000005257,9606.ENSP00000215832,9606.ENSP00000216373,9606.ENSP00000219070,9606.ENSP00000225577,9606.ENSP00000227507,9606.ENSP00000228872,9606.ENSP00000232564,9606.ENSP00000250457,9606.ENSP00000256078,9606.ENSP00000256474,9606.ENSP00000257290,9606.ENSP00000258341,9606.ENSP00000261023,9606.ENSP00000261254,9606.ENSP00000261799,9606.ENSP00000261837,9606.ENSP00000262160,9606.ENSP00000262643,…	RALA,MAPK1,SOS2,MMP2,RPS6KB1,CCND1,CDKN1B,GNB4,EGLN3,KRAS,VHL,PDGFRA,LAMC1,ITGAV,CCND2,PDGFRB,GNB5,SMAD2,CCNE1,E2F3,CCDC6,AKT3,PIK3CA,FGF2,STAT3,LEF1,CDK6,IGF1R,RALB,CSF1R,PPARG,KIT,APPL1,ADCY9,TGFA,MITF,STAT6,CRK,BCL2L1,IGF1,IL13,DVL3,MET,SP1,PDGFB,COL4A5,SMAD4,JAK1,IFNAR2,E2F1,MAX,TGFBR2,MAPK10,E2F2,NRAS,GNAI3,XIAP,PTEN,NCOA3,STK4,TGFBR1,EDN1,FOXO1,ETS1,BCL2L11,BCL2,CDC42,CDKN1A,ITGA6,SOS1,FGFR…
hsa05215	Prostate cancer	32	96	0.75	6.86e-11	9606.ENSP00000215832,9606.ENSP00000216373,9606.ENSP00000227507,9606.ENSP00000228872,9606.ENSP00000256078,9606.ENSP00000257290,9606.ENSP00000261799,9606.ENSP00000262643,9606.ENSP00000262904,9606.ENSP00000263826,9606.ENSP00000263967,9606.ENSP00000265165,9606.ENSP00000268035,9606.ENSP00000295400,9606.ENSP00000302665,9606.ENSP00000329140,9606.ENSP00000330382,9606.ENSP00000345571,9606.ENSP00000354487,…	MAPK1,SOS2,CCND1,CDKN1B,KRAS,PDGFRA,PDGFRB,CCNE1,E2F3,AKT3,PIK3CA,LEF1,IGF1R,TGFA,IGF1,CREB3L2,PDGFB,E2F1,ZEB1,E2F2,NRAS,PTEN,FOXO1,BCL2,CDKN1A,CREB1,SOS1,FGFR1,PDGFC,PIK3R1,CCNE2,IKBKB
hsa05202	Transcriptional misregulation in cancer	41	171	0.6	2.93e-10	9606.ENSP00000216513,9606.ENSP00000225792,9606.ENSP00000228872,9606.ENSP00000252674,9606.ENSP00000254657,9606.ENSP00000261254,9606.ENSP00000261900,9606.ENSP00000264157,9606.ENSP00000268035,9606.ENSP00000271526,9606.ENSP00000281043,9606.ENSP00000283921,9606.ENSP00000286301,9606.ENSP00000287820,9606.ENSP00000295025,9606.ENSP00000295600,9606.ENSP00000302564,9606.ENSP00000302665,9606.ENSP00000317272,…	SIX4,DDX5,CDKN1B,MLLT1,PER2,CCND2,CCNT1,CCNT2,IGF1R,PRCC,MYCN,HOXA10,CSF1R,PPARG,REL,MITF,BCL2L1,IGF1,MET,SP1,H3F3C,HOXA9,BCL11B,ELK4,MAX,TGFBR2,FUT8,ZEB1,RUNX2,PBX3,FOXO1,PAX3,AFF1,CDKN1A,RUNX1T1,ETV1,SMAD1,KMT2A,HMGA2,DDIT3,NR4A3
hsa04151	PI3K-Akt signaling pathway	61	350	0.46	2.99e-10	9606.ENSP00000215832,9606.ENSP00000216373,9606.ENSP00000222573,9606.ENSP00000225577,9606.ENSP00000227507,9606.ENSP00000228872,9606.ENSP00000232564,9606.ENSP00000244869,9606.ENSP00000256078,9606.ENSP00000257290,9606.ENSP00000258341,9606.ENSP00000260356,9606.ENSP00000261023,9606.ENSP00000261254,9606.ENSP00000261799,9606.ENSP00000261837,9606.ENSP00000262133,9606.ENSP00000262643,9606.ENSP00000263826,…	MAPK1,SOS2,ITGB8,RPS6KB1,CCND1,CDKN1B,GNB4,EREG,KRAS,PDGFRA,LAMC1,THBS1,ITGAV,CCND2,PDGFRB,GNB5,RBL2,CCNE1,AKT3,PIK3CA,FGF2,ITGA9,CDK6,IGF1R,CSF1R,KIT,TGFA,TSC1,BCL2L1,IGF1,DDIT4,MET,PPP2R2A,CREB3L2,PDGFB,COL4A5,ERBB4,JAK1,IFNAR2,MCL1,NRAS,PTEN,BCL2L11,YWHAZ,SGK3,BCL2,CDKN1A,MAGI1,ITGA6,CREB1,SOS1,FGFR1,LAMA2,PDGFC,PIK3R1,CCNE2,IKBKB,ITGB3,PHLPP2,VEGFA,PRLR
hsa01521	EGFR tyrosine kinase inhibitor resistance	27	78	0.76	1.07e-09	9606.ENSP00000215832,9606.ENSP00000216373,9606.ENSP00000225577,9606.ENSP00000256078,9606.ENSP00000257290,9606.ENSP00000261799,9606.ENSP00000262995,9606.ENSP00000263826,9606.ENSP00000263967,9606.ENSP00000264498,9606.ENSP00000264657,9606.ENSP00000268035,9606.ENSP00000295400,9606.ENSP00000302564,9606.ENSP00000302665,9606.ENSP00000317272,9606.ENSP00000330382,9606.ENSP00000343204,9606.ENSP00000351015,…	MAPK1,SOS2,RPS6KB1,KRAS,PDGFRA,PDGFRB,GAB1,AKT3,PIK3CA,FGF2,STAT3,IGF1R,TGFA,BCL2L1,IGF1,MET,PDGFB,JAK1,NF1,NRAS,PTEN,BCL2L11,BCL2,SOS1,PDGFC,PIK3R1,VEGFA
hsa04010	MAPK signaling pathway	53	288	0.49	1.07e-09	9606.ENSP00000215832,9606.ENSP00000216373,9606.ENSP00000229795,9606.ENSP00000244869,9606.ENSP00000246792,9606.ENSP00000250559,9606.ENSP00000250896,9606.ENSP00000256078,9606.ENSP00000257290,9606.ENSP00000261716,9606.ENSP00000261799,9606.ENSP00000263826,9606.ENSP00000264498,9606.ENSP00000266376,9606.ENSP00000268035,9606.ENSP00000274376,9606.ENSP00000278568,9606.ENSP00000286301,9606.ENSP00000288135,…	MAPK1,SOS2,MAPK14,EREG,RRAS,RAP1B,MKNK2,KRAS,PDGFRA,TAOK1,PDGFRB,AKT3,FGF2,CACNA1C,IGF1R,RASA1,PAK1,CSF1R,KIT,DUSP2,TGFA,CRK,IGF1,MET,PPM1A,PDGFB,ERBB4,MAP2K3,ELK4,NF1,MAX,TGFBR2,MAPK10,MAP3K3,NRAS,DUSP5,STK4,TGFBR1,RPS6KA3,CDC42,NLK,MAP3K2,SOS1,FGFR1,STMN1,PDGFC,IKBKB,TRAF6,CACNB4,DDIT3,MAP2K6,VEGFA,RPS6KA5
hsa05212	Pancreatic cancer	26	73	0.77	1.13e-09	9606.ENSP00000005257,9606.ENSP00000215832,9606.ENSP00000225577,9606.ENSP00000227507,9606.ENSP00000256078,9606.ENSP00000262160,9606.ENSP00000262904,9606.ENSP00000263826,9606.ENSP00000263967,9606.ENSP00000264657,9606.ENSP00000265734,9606.ENSP00000272519,9606.ENSP00000295400,9606.ENSP00000302564,9606.ENSP00000341551,9606.ENSP00000343204,9606.ENSP00000345571,9606.ENSP00000351905,9606.ENSP00000352157,…	RALA,MAPK1,RPS6KB1,CCND1,KRAS,SMAD2,E2F3,AKT3,PIK3CA,STAT3,CDK6,RALB,TGFA,BCL2L1,SMAD4,JAK1,E2F1,TGFBR2,MAPK10,E2F2,TGFBR1,CDC42,CDKN1A,PIK3R1,IKBKB,VEGFA
hsa05211	Renal cell carcinoma	24	66	0.78	4.1e-09	9606.ENSP00000215832,9606.ENSP00000216373,9606.ENSP00000250457,9606.ENSP00000250559,9606.ENSP00000256078,9606.ENSP00000256474,9606.ENSP00000262995,9606.ENSP00000263826,9606.ENSP00000263967,9606.ENSP00000271526,9606.ENSP00000278568,9606.ENSP00000295400,9606.ENSP00000300574,9606.ENSP00000317272,9606.ENSP00000330382,9606.ENSP00000358548,9606.ENSP00000376436,9606.ENSP00000383118,9606.ENSP00000384849,…	MAPK1,SOS2,EGLN3,RAP1B,KRAS,VHL,GAB1,AKT3,PIK3CA,PRCC,PAK1,TGFA,CRK,MET,PDGFB,NRAS,ETS1,CDC42,CDKN1A,SOS1,PIK3R1,CUL2,TCEB1,VEGFA
hsa04068	FoxO signaling pathway	32	127	0.62	9.46e-09	9606.ENSP00000212015,9606.ENSP00000215832,9606.ENSP00000216373,9606.ENSP00000227507,9606.ENSP00000228872,9606.ENSP00000229795,9606.ENSP00000256078,9606.ENSP00000261254,9606.ENSP00000262133,9606.ENSP00000263826,9606.ENSP00000263967,9606.ENSP00000264657,9606.ENSP00000266458,9606.ENSP00000268035,9606.ENSP00000274031,9606.ENSP00000274289,9606.ENSP00000302665,9606.ENSP00000341551,9606.ENSP00000351905,…	SIRT1,MAPK1,SOS2,CCND1,CDKN1B,MAPK14,KRAS,CCND2,RBL2,AKT3,PIK3CA,STAT3,GABARAPL1,IGF1R,SETD7,PLK2,IGF1,SMAD4,TGFBR2,MAPK10,NRAS,PTEN,STK4,TGFBR1,FOXO1,BCL2L11,SGK3,NLK,CDKN1A,SOS1,PIK3R1,IKBKB
hsa04014	Ras signaling pathway	43	226	0.5	1.96e-08	9606.ENSP00000005257,9606.ENSP00000215832,9606.ENSP00000216373,9606.ENSP00000232564,9606.ENSP00000246792,9606.ENSP00000250559,9606.ENSP00000256078,9606.ENSP00000257290,9606.ENSP00000261799,9606.ENSP00000261837,9606.ENSP00000262995,9606.ENSP00000263826,9606.ENSP00000263967,9606.ENSP00000264498,9606.ENSP00000268035,9606.ENSP00000272519,9606.ENSP00000274376,9606.ENSP00000278568,9606.ENSP00000286301,…	RALA,MAPK1,SOS2,GNB4,RRAS,RAP1B,KRAS,PDGFRA,PDGFRB,GNB5,GAB1,AKT3,PIK3CA,FGF2,IGF1R,RALB,RASA1,PAK1,CSF1R,TIAM1,KIT,REL,TGFA,ARF6,BCL2L1,IGF1,MET,PDGFB,NF1,MAPK10,RAB5B,SHOC2,NRAS,STK4,ETS1,CDC42,SOS1,FGFR1,PDGFC,ABL2,PIK3R1,IKBKB,VEGFA
hsa04218	Cellular senescence	34	150	0.58	2.4e-08	9606.ENSP00000212015,9606.ENSP00000215832,9606.ENSP00000227507,9606.ENSP00000229795,9606.ENSP00000246792,9606.ENSP00000256078,9606.ENSP00000261254,9606.ENSP00000262133,9606.ENSP00000262160,9606.ENSP00000262643,9606.ENSP00000262904,9606.ENSP00000263826,9606.ENSP00000263967,9606.ENSP00000265734,9606.ENSP00000282388,9606.ENSP00000298552,9606.ENSP00000303706,9606.ENSP00000345083,9606.ENSP00000345571,…	SIRT1,MAPK1,CCND1,MAPK14,RRAS,KRAS,CCND2,RBL2,SMAD2,CCNE1,E2F3,AKT3,PIK3CA,CDK6,ZFP36L2,TSC1,CDC25A,MAP2K3,E2F1,TGFBR2,E2F2,NRAS,PTEN,TGFBR1,FOXO1,ETS1,CDKN1A,HIPK2,ZFP36L1,CHEK1,E2F5,PIK3R1,CCNE2,MAP2K6
hsa05210	Colorectal cancer	25	82	0.71	2.48e-08	9606.ENSP00000005257,9606.ENSP00000215832,9606.ENSP00000216373,9606.ENSP00000225577,9606.ENSP00000227507,9606.ENSP00000244869,9606.ENSP00000256078,9606.ENSP00000262160,9606.ENSP00000263826,9606.ENSP00000263967,9606.ENSP00000265165,9606.ENSP00000272519,9606.ENSP00000288266,9606.ENSP00000295400,9606.ENSP00000341551,9606.ENSP00000351905,9606.ENSP00000352157,9606.ENSP00000358548,9606.ENSP00000364133,…	RALA,MAPK1,SOS2,RPS6KB1,CCND1,EREG,KRAS,SMAD2,AKT3,PIK3CA,LEF1,RALB,APPL1,TGFA,SMAD4,TGFBR2,MAPK10,NRAS,TGFBR1,BCL2L11,BCL2,CDKN1A,SOS1,BBC3,PIK3R1
hsa05218	Melanoma	23	72	0.73	5.11e-08	9606.ENSP00000215832,9606.ENSP00000227507,9606.ENSP00000256078,9606.ENSP00000257290,9606.ENSP00000261799,9606.ENSP00000262904,9606.ENSP00000263826,9606.ENSP00000263967,9606.ENSP00000264498,9606.ENSP00000265734,9606.ENSP00000268035,9606.ENSP00000295600,9606.ENSP00000302665,9606.ENSP00000317272,9606.ENSP00000330382,9606.ENSP00000345571,9606.ENSP00000355249,9606.ENSP00000358548,9606.ENSP00000361021,…	MAPK1,CCND1,KRAS,PDGFRA,PDGFRB,E2F3,AKT3,PIK3CA,FGF2,CDK6,IGF1R,MITF,IGF1,MET,PDGFB,E2F1,E2F2,NRAS,PTEN,CDKN1A,FGFR1,PDGFC,PIK3R1
hsa01522	Endocrine resistance	26	95	0.66	6.81e-08	9606.ENSP00000215832,9606.ENSP00000216373,9606.ENSP00000219070,9606.ENSP00000225577,9606.ENSP00000227507,9606.ENSP00000228872,9606.ENSP00000229795,9606.ENSP00000256078,9606.ENSP00000262904,9606.ENSP00000263826,9606.ENSP00000263967,9606.ENSP00000268035,9606.ENSP00000294016,9606.ENSP00000302665,9606.ENSP00000325690,9606.ENSP00000329357,9606.ENSP00000345571,9606.ENSP00000352157,9606.ENSP00000355249,…	MAPK1,SOS2,MMP2,RPS6KB1,CCND1,CDKN1B,MAPK14,KRAS,E2F3,AKT3,PIK3CA,IGF1R,ADCY9,IGF1,CARM1,SP1,E2F1,MAPK10,E2F2,NRAS,NCOA3,BCL2,CDKN1A,SOS1,ESR1,PIK3R1
hsa04510	Focal adhesion	37	198	0.49	3.16e-07	9606.ENSP00000215832,9606.ENSP00000216373,9606.ENSP00000222573,9606.ENSP00000227507,9606.ENSP00000250559,9606.ENSP00000252699,9606.ENSP00000257290,9606.ENSP00000258341,9606.ENSP00000260356,9606.ENSP00000261023,9606.ENSP00000261254,9606.ENSP00000261799,9606.ENSP00000263826,9606.ENSP00000263967,9606.ENSP00000264741,9606.ENSP00000268035,9606.ENSP00000278568,9606.ENSP00000300574,9606.ENSP00000302665,…	MAPK1,SOS2,ITGB8,CCND1,RAP1B,ACTN4,PDGFRA,LAMC1,THBS1,ITGAV,CCND2,PDGFRB,AKT3,PIK3CA,ITGA9,IGF1R,PAK1,CRK,IGF1,MET,PDGFB,COL4A5,MAPK10,XIAP,PTEN,BCL2,CDC42,ARHGAP35,ITGA6,SOS1,PPP1R12A,LAMA2,PDGFC,PIK3R1,ITGB3,ACTG1,VEGFA
hsa05222	Small cell lung cancer	24	92	0.64	5.27e-07	9606.ENSP00000227507,9606.ENSP00000228872,9606.ENSP00000258341,9606.ENSP00000261023,9606.ENSP00000262643,9606.ENSP00000262904,9606.ENSP00000263826,9606.ENSP00000263967,9606.ENSP00000265734,9606.ENSP00000302564,9606.ENSP00000331902,9606.ENSP00000345571,9606.ENSP00000351490,9606.ENSP00000355249,9606.ENSP00000360242,9606.ENSP00000361021,9606.ENSP00000381185,9606.ENSP00000384849,9606.ENSP00000386896,…	CCND1,CDKN1B,LAMC1,ITGAV,CCNE1,E2F3,AKT3,PIK3CA,CDK6,BCL2L1,COL4A5,E2F1,MAX,E2F2,XIAP,PTEN,BCL2,CDKN1A,ITGA6,LAMA2,PIK3R1,CCNE2,IKBKB,TRAF6
hsa05205	Proteoglycans in cancer	36	196	0.49	6.44e-07	9606.ENSP00000215832,9606.ENSP00000216373,9606.ENSP00000219070,9606.ENSP00000225577,9606.ENSP00000225792,9606.ENSP00000227507,9606.ENSP00000229795,9606.ENSP00000246792,9606.ENSP00000256078,9606.ENSP00000260356,9606.ENSP00000261023,9606.ENSP00000262160,9606.ENSP00000262995,9606.ENSP00000263826,9606.ENSP00000263967,9606.ENSP00000264498,9606.ENSP00000264657,9606.ENSP00000268035,9606.ENSP00000278568,…	MAPK1,SOS2,MMP2,RPS6KB1,DDX5,CCND1,MAPK14,RRAS,KRAS,THBS1,ITGAV,SMAD2,GAB1,AKT3,PIK3CA,FGF2,STAT3,IGF1R,PAK1,TIAM1,IGF1,MET,ERBB4,NRAS,CDC42,RDX,CDKN1A,SOS1,PPP1R12A,FGFR1,ESR1,PIK3R1,FZD3,ITGB3,ACTG1,VEGFA
hsa05214	Glioma	21	72	0.69	6.99e-07	9606.ENSP00000215832,9606.ENSP00000216373,9606.ENSP00000227507,9606.ENSP00000256078,9606.ENSP00000257290,9606.ENSP00000261799,9606.ENSP00000262904,9606.ENSP00000263826,9606.ENSP00000263967,9606.ENSP00000265734,9606.ENSP00000268035,9606.ENSP00000295400,9606.ENSP00000302665,9606.ENSP00000330382,9606.ENSP00000345571,9606.ENSP00000355249,9606.ENSP00000358548,9606.ENSP00000361021,9606.ENSP00000384849,…	MAPK1,SOS2,CCND1,KRAS,PDGFRA,PDGFRB,E2F3,AKT3,PIK3CA,CDK6,IGF1R,TGFA,IGF1,PDGFB,E2F1,E2F2,NRAS,PTEN,CDKN1A,SOS1,PIK3R1
hsa05166	Human T-cell leukemia virus 1 infection	37	211	0.47	1.07e-06	9606.ENSP00000215832,9606.ENSP00000227507,9606.ENSP00000237264,9606.ENSP00000240055,9606.ENSP00000256078,9606.ENSP00000261254,9606.ENSP00000262160,9606.ENSP00000262643,9606.ENSP00000262904,9606.ENSP00000263754,9606.ENSP00000263826,9606.ENSP00000263967,9606.ENSP00000294016,9606.ENSP00000302564,9606.ENSP00000310170,9606.ENSP00000329140,9606.ENSP00000341551,9606.ENSP00000343204,9606.ENSP00000345571,…	MAPK1,CCND1,TBPL1,NFYB,KRAS,CCND2,SMAD2,CCNE1,E2F3,KAT2B,AKT3,PIK3CA,ADCY9,BCL2L1,FOSL1,CREB3L2,SMAD4,JAK1,E2F1,ELK4,TGFBR2,MAPK10,MAP3K3,E2F2,NRAS,XIAP,PTEN,TGFBR1,ETS1,CDKN1A,XPO1,CREB1,CHEK1,PIK3R1,CCNE2,IKBKB,CDC27
hsa04015	Rap1 signaling pathway	36	202	0.47	1.08e-06	9606.ENSP00000005257,9606.ENSP00000215832,9606.ENSP00000229795,9606.ENSP00000246792,9606.ENSP00000250559,9606.ENSP00000256078,9606.ENSP00000257290,9606.ENSP00000260356,9606.ENSP00000261799,9606.ENSP00000263826,9606.ENSP00000263967,9606.ENSP00000264498,9606.ENSP00000268035,9606.ENSP00000272519,9606.ENSP00000286301,9606.ENSP00000286827,9606.ENSP00000288135,9606.ENSP00000294016,9606.ENSP00000300574,…	RALA,MAPK1,MAPK14,RRAS,RAP1B,KRAS,PDGFRA,THBS1,PDGFRB,AKT3,PIK3CA,FGF2,IGF1R,RALB,CSF1R,TIAM1,KIT,ADCY9,CRK,IGF1,MET,PDGFB,MAP2K3,ENAH,NRAS,GNAI3,PARD6B,CDC42,MAGI1,FGFR1,PDGFC,PIK3R1,ITGB3,ACTG1,MAP2K6,VEGFA
hsa05220	Chronic myeloid leukemia	21	75	0.67	1.09e-06	9606.ENSP00000215832,9606.ENSP00000216373,9606.ENSP00000227507,9606.ENSP00000228872,9606.ENSP00000256078,9606.ENSP00000262904,9606.ENSP00000263826,9606.ENSP00000263967,9606.ENSP00000265734,9606.ENSP00000300574,9606.ENSP00000302564,9606.ENSP00000341551,9606.ENSP00000345571,9606.ENSP00000351905,9606.ENSP00000355249,9606.ENSP00000358548,9606.ENSP00000364133,9606.ENSP00000384849,9606.ENSP00000387784,…	MAPK1,SOS2,CCND1,CDKN1B,KRAS,E2F3,AKT3,PIK3CA,CDK6,CRK,BCL2L1,SMAD4,E2F1,TGFBR2,E2F2,NRAS,TGFBR1,CDKN1A,SOS1,PIK3R1,IKBKB
hsa05161	Hepatitis B	31	159	0.51	1.4e-06	9606.ENSP00000215832,9606.ENSP00000216373,9606.ENSP00000229795,9606.ENSP00000256078,9606.ENSP00000262643,9606.ENSP00000262904,9606.ENSP00000263826,9606.ENSP00000263967,9606.ENSP00000264657,9606.ENSP00000300134,9606.ENSP00000329140,9606.ENSP00000341551,9606.ENSP00000343204,9606.ENSP00000345083,9606.ENSP00000345571,9606.ENSP00000351905,9606.ENSP00000352157,9606.ENSP00000355249,9606.ENSP00000358548,…	MAPK1,SOS2,MAPK14,KRAS,CCNE1,E2F3,AKT3,PIK3CA,STAT3,STAT6,CREB3L2,SMAD4,JAK1,MAP2K3,E2F1,TGFBR2,MAPK10,E2F2,NRAS,TGFBR1,YWHAZ,BCL2,DDX3X,CDKN1A,CREB1,SOS1,PIK3R1,CCNE2,IKBKB,TRAF6,MAP2K6
hsa05225	Hepatocellular carcinoma	31	160	0.51	1.51e-06	9606.ENSP00000215832,9606.ENSP00000216373,9606.ENSP00000225577,9606.ENSP00000227507,9606.ENSP00000256078,9606.ENSP00000262160,9606.ENSP00000262904,9606.ENSP00000262995,9606.ENSP00000263826,9606.ENSP00000263967,9606.ENSP00000265165,9606.ENSP00000265734,9606.ENSP00000268035,9606.ENSP00000295400,9606.ENSP00000302564,9606.ENSP00000316054,9606.ENSP00000317272,9606.ENSP00000320485,9606.ENSP00000341551,…	MAPK1,SOS2,RPS6KB1,CCND1,KRAS,SMAD2,E2F3,GAB1,AKT3,PIK3CA,LEF1,CDK6,IGF1R,TGFA,BCL2L1,DVL3,MET,ARID1A,SMAD4,ARID1B,E2F1,TGFBR2,E2F2,NRAS,PTEN,TGFBR1,CDKN1A,SOS1,PIK3R1,FZD3,ACTG1
hsa04115	p53 signaling pathway	20	72	0.67	2.17e-06	9606.ENSP00000227507,9606.ENSP00000253063,9606.ENSP00000260356,9606.ENSP00000261254,9606.ENSP00000262643,9606.ENSP00000265734,9606.ENSP00000302564,9606.ENSP00000302665,9606.ENSP00000306682,9606.ENSP00000311221,9606.ENSP00000353770,9606.ENSP00000356150,9606.ENSP00000361021,9606.ENSP00000381185,9606.ENSP00000384849,9606.ENSP00000388648,9606.ENSP00000393762,9606.ENSP00000404503,9606.ENSP00000429089,…	CCND1,SESN2,THBS1,CCND2,CCNE1,CDK6,BCL2L1,IGF1,PPM1D,ZMAT3,RRM2,MDM4,PTEN,BCL2,CDKN1A,CHEK1,SESN1,BBC3,CCNE2,SESN3
hsa04917	Prolactin signaling pathway	19	69	0.66	4.75e-06	9606.ENSP00000215832,9606.ENSP00000216373,9606.ENSP00000227507,9606.ENSP00000229795,9606.ENSP00000245414,9606.ENSP00000256078,9606.ENSP00000261254,9606.ENSP00000263826,9606.ENSP00000263967,9606.ENSP00000264657,9606.ENSP00000305133,9606.ENSP00000329418,9606.ENSP00000352157,9606.ENSP00000358548,9606.ENSP00000381034,9606.ENSP00000387784,9606.ENSP00000405330,9606.ENSP00000428056,9606.ENSP00000482954	MAPK1,SOS2,CCND1,MAPK14,IRF1,KRAS,CCND2,AKT3,PIK3CA,STAT3,SOCS5,SOCS1,MAPK10,NRAS,SOCS6,SOS1,ESR1,PIK3R1,PRLR
hsa05226	Gastric cancer	28	144	0.51	5.14e-06	9606.ENSP00000215832,9606.ENSP00000216373,9606.ENSP00000225577,9606.ENSP00000227507,9606.ENSP00000228872,9606.ENSP00000256078,9606.ENSP00000262160,9606.ENSP00000262643,9606.ENSP00000262904,9606.ENSP00000262995,9606.ENSP00000263826,9606.ENSP00000263967,9606.ENSP00000264498,9606.ENSP00000265165,9606.ENSP00000316054,9606.ENSP00000317272,9606.ENSP00000341551,9606.ENSP00000345571,9606.ENSP00000351905,…	MAPK1,SOS2,RPS6KB1,CCND1,CDKN1B,KRAS,SMAD2,CCNE1,E2F3,GAB1,AKT3,PIK3CA,FGF2,LEF1,DVL3,MET,SMAD4,E2F1,TGFBR2,E2F2,NRAS,TGFBR1,BCL2,CDKN1A,SOS1,PIK3R1,CCNE2,FZD3
hsa05165	Human papillomavirus infection	46	325	0.37	5.84e-06	9606.ENSP00000215832,9606.ENSP00000216373,9606.ENSP00000222573,9606.ENSP00000222725,9606.ENSP00000225577,9606.ENSP00000227507,9606.ENSP00000228872,9606.ENSP00000237264,9606.ENSP00000245414,9606.ENSP00000256078,9606.ENSP00000258341,9606.ENSP00000260356,9606.ENSP00000261023,9606.ENSP00000261254,9606.ENSP00000261799,9606.ENSP00000262133,9606.ENSP00000262643,9606.ENSP00000263826,9606.ENSP00000263967,…	MAPK1,SOS2,ITGB8,LFNG,RPS6KB1,CCND1,CDKN1B,TBPL1,IRF1,KRAS,LAMC1,THBS1,ITGAV,CCND2,PDGFRB,RBL2,CCNE1,AKT3,PIK3CA,ITGA9,CDK6,TSC1,DVL3,PPP2R2A,CREB3L2,COL4A5,JAK1,IFNAR2,E2F1,NRAS,PARD6B,PTEN,FOXO1,CDC42,CDKN1A,MAGI1,ITGA6,CREB1,SOS1,LAMA2,PIK3R1,CCNE2,IKBKB,FZD3,ITGB3,VEGFA
hsa04211	Longevity regulating pathway	21	87	0.6	6.76e-06	9606.ENSP00000212015,9606.ENSP00000225577,9606.ENSP00000253063,9606.ENSP00000256078,9606.ENSP00000263826,9606.ENSP00000263967,9606.ENSP00000264867,9606.ENSP00000268035,9606.ENSP00000287820,9606.ENSP00000288266,9606.ENSP00000294016,9606.ENSP00000298552,9606.ENSP00000302665,9606.ENSP00000329140,9606.ENSP00000349616,9606.ENSP00000358548,9606.ENSP00000368880,9606.ENSP00000387699,9606.ENSP00000393762,…	SIRT1,RPS6KB1,SESN2,KRAS,AKT3,PIK3CA,PPARGC1A,IGF1R,PPARG,APPL1,ADCY9,TSC1,IGF1,CREB3L2,ADIPOR2,NRAS,FOXO1,CREB1,SESN1,PIK3R1,SESN3
hsa04933	AGE-RAGE signaling pathway in diabetic complications	22	98	0.57	1.02e-05	9606.ENSP00000215832,9606.ENSP00000219070,9606.ENSP00000227507,9606.ENSP00000228872,9606.ENSP00000229795,9606.ENSP00000256078,9606.ENSP00000262160,9606.ENSP00000263826,9606.ENSP00000263967,9606.ENSP00000264657,9606.ENSP00000331902,9606.ENSP00000341551,9606.ENSP00000351905,9606.ENSP00000352157,9606.ENSP00000358548,9606.ENSP00000364133,9606.ENSP00000368683,9606.ENSP00000368880,9606.ENSP00000381185,…	MAPK1,MMP2,CCND1,CDKN1B,MAPK14,KRAS,SMAD2,AKT3,PIK3CA,STAT3,COL4A5,SMAD4,TGFBR2,MAPK10,NRAS,TGFBR1,EDN1,FOXO1,BCL2,CDC42,PIK3R1,VEGFA
hsa05223	Non-small cell lung cancer	18	68	0.64	1.3e-05	9606.ENSP00000215832,9606.ENSP00000216373,9606.ENSP00000227507,9606.ENSP00000256078,9606.ENSP00000262904,9606.ENSP00000263826,9606.ENSP00000263967,9606.ENSP00000264657,9606.ENSP00000265734,9606.ENSP00000295400,9606.ENSP00000317272,9606.ENSP00000345571,9606.ENSP00000355249,9606.ENSP00000358548,9606.ENSP00000361892,9606.ENSP00000384849,9606.ENSP00000387784,9606.ENSP00000428056	MAPK1,SOS2,CCND1,KRAS,E2F3,AKT3,PIK3CA,STAT3,CDK6,TGFA,MET,E2F1,E2F2,NRAS,STK4,CDKN1A,SOS1,PIK3R1
hsa05224	Breast cancer	27	145	0.49	1.44e-05	9606.ENSP00000215832,9606.ENSP00000216373,9606.ENSP00000225577,9606.ENSP00000227507,9606.ENSP00000256078,9606.ENSP00000262904,9606.ENSP00000263826,9606.ENSP00000263967,9606.ENSP00000264498,9606.ENSP00000265165,9606.ENSP00000265734,9606.ENSP00000268035,9606.ENSP00000288135,9606.ENSP00000302665,9606.ENSP00000316054,9606.ENSP00000329357,9606.ENSP00000345571,9606.ENSP00000355249,9606.ENSP00000358548,…	MAPK1,SOS2,RPS6KB1,CCND1,KRAS,E2F3,AKT3,PIK3CA,FGF2,LEF1,CDK6,IGF1R,KIT,IGF1,DVL3,SP1,E2F1,E2F2,NRAS,PTEN,NCOA3,CDKN1A,SOS1,FGFR1,ESR1,PIK3R1,FZD3
hsa04550	Signaling pathways regulating pluripotency of stem cells	26	140	0.49	2.28e-05	9606.ENSP00000215832,9606.ENSP00000229795,9606.ENSP00000241416,9606.ENSP00000256078,9606.ENSP00000262160,9606.ENSP00000263409,9606.ENSP00000263640,9606.ENSP00000263826,9606.ENSP00000263967,9606.ENSP00000264498,9606.ENSP00000264657,9606.ENSP00000268035,9606.ENSP00000302665,9606.ENSP00000311816,9606.ENSP00000316054,9606.ENSP00000341551,9606.ENSP00000343204,9606.ENSP00000351947,9606.ENSP00000354724,…	MAPK1,MAPK14,ACVR2A,KRAS,SMAD2,LIFR,ACVR1,AKT3,PIK3CA,FGF2,STAT3,IGF1R,IGF1,REST,DVL3,SMAD4,JAK1,SMARCAD1,PCGF3,NRAS,BMPR2,FGFR1,SMAD1,PIK3R1,FZD3,SMAD5
hsa05163	Human cytomegalovirus infection	34	218	0.42	2.28e-05	9606.ENSP00000215832,9606.ENSP00000216373,9606.ENSP00000225577,9606.ENSP00000227507,9606.ENSP00000229795,9606.ENSP00000232564,9606.ENSP00000256078,9606.ENSP00000257290,9606.ENSP00000261023,9606.ENSP00000261837,9606.ENSP00000262904,9606.ENSP00000263826,9606.ENSP00000263967,9606.ENSP00000264657,9606.ENSP00000265734,9606.ENSP00000294016,9606.ENSP00000298552,9606.ENSP00000300574,9606.ENSP00000329140,…	MAPK1,SOS2,RPS6KB1,CCND1,MAPK14,GNB4,KRAS,PDGFRA,ITGAV,GNB5,E2F3,AKT3,PIK3CA,STAT3,CDK6,ADCY9,TSC1,CRK,CREB3L2,SP1,JAK1,E2F1,E2F2,NRAS,GNAI3,CDKN1A,CREB1,SOS1,GNA13,PIK3R1,IKBKB,ITGB3,MAP2K6,VEGFA
hsa04810	Regulation of actin cytoskeleton	33	209	0.42	2.44e-05	9606.ENSP00000215832,9606.ENSP00000216373,9606.ENSP00000222573,9606.ENSP00000246792,9606.ENSP00000252699,9606.ENSP00000256078,9606.ENSP00000257290,9606.ENSP00000261023,9606.ENSP00000261799,9606.ENSP00000263967,9606.ENSP00000264498,9606.ENSP00000264741,9606.ENSP00000278568,9606.ENSP00000286827,9606.ENSP00000294742,9606.ENSP00000295851,9606.ENSP00000298159,9606.ENSP00000300574,9606.ENSP00000330382,…	MAPK1,SOS2,ITGB8,RRAS,ACTN4,KRAS,PDGFRA,ITGAV,PDGFRB,PIK3CA,FGF2,ITGA9,PAK1,TIAM1,ARPC5,ABI2,CFL2,CRK,PDGFB,ENAH,NRAS,CDC42,RDX,ARHGAP35,ITGA6,SOS1,PPP1R12A,FGFR1,GNA13,PDGFC,PIK3R1,ITGB3,ACTG1
hsa05221	Acute myeloid leukemia	17	66	0.63	3.02e-05	9606.ENSP00000215832,9606.ENSP00000216373,9606.ENSP00000225577,9606.ENSP00000227507,9606.ENSP00000254657,9606.ENSP00000256078,9606.ENSP00000263826,9606.ENSP00000263967,9606.ENSP00000264657,9606.ENSP00000265165,9606.ENSP00000286301,9606.ENSP00000288135,9606.ENSP00000358548,9606.ENSP00000387784,9606.ENSP00000402257,9606.ENSP00000428056,9606.ENSP00000430684	MAPK1,SOS2,RPS6KB1,CCND1,PER2,KRAS,AKT3,PIK3CA,STAT3,LEF1,CSF1R,KIT,NRAS,SOS1,RUNX1T1,PIK3R1,IKBKB
hsa04350	TGF-beta signaling pathway	20	91	0.56	3.38e-05	9606.ENSP00000215832,9606.ENSP00000225577,9606.ENSP00000241416,9606.ENSP00000260356,9606.ENSP00000262160,9606.ENSP00000263640,9606.ENSP00000287727,9606.ENSP00000308219,9606.ENSP00000329357,9606.ENSP00000337159,9606.ENSP00000341551,9606.ENSP00000351905,9606.ENSP00000354621,9606.ENSP00000362981,9606.ENSP00000363492,9606.ENSP00000363708,9606.ENSP00000364133,9606.ENSP00000398124,9606.ENSP00000426568,…	MAPK1,RPS6KB1,ACVR2A,THBS1,SMAD2,ACVR1,ZFYVE9,RGMB,SP1,ZFYVE16,SMAD4,TGFBR2,SMURF1,TGIF2,GDF5,BMPR2,TGFBR1,E2F5,SMAD1,SMAD5
hsa04520	Adherens junction	17	67	0.63	3.4e-05	9606.ENSP00000215832,9606.ENSP00000244050,9606.ENSP00000252699,9606.ENSP00000265165,9606.ENSP00000268035,9606.ENSP00000317272,9606.ENSP00000340279,9606.ENSP00000341551,9606.ENSP00000351905,9606.ENSP00000360683,9606.ENSP00000364133,9606.ENSP00000383118,9606.ENSP00000384625,9606.ENSP00000393312,9606.ENSP00000400010,9606.ENSP00000458162,9606.ENSP00000462468	MAPK1,SNAI1,ACTN4,LEF1,IGF1R,MET,SSX2IP,SMAD4,TGFBR2,PTPN1,TGFBR1,CDC42,NLK,FGFR1,PTPRJ,ACTG1,YES1
hsa04012	ErbB signaling pathway	19	83	0.58	3.4e-05	9606.ENSP00000215832,9606.ENSP00000216373,9606.ENSP00000225577,9606.ENSP00000228872,9606.ENSP00000244869,9606.ENSP00000256078,9606.ENSP00000262995,9606.ENSP00000263826,9606.ENSP00000263967,9606.ENSP00000278568,9606.ENSP00000295400,9606.ENSP00000300574,9606.ENSP00000342235,9606.ENSP00000352157,9606.ENSP00000358548,9606.ENSP00000384849,9606.ENSP00000387784,9606.ENSP00000427562,9606.ENSP00000428056	MAPK1,SOS2,RPS6KB1,CDKN1B,EREG,KRAS,GAB1,AKT3,PIK3CA,PAK1,TGFA,CRK,ERBB4,MAPK10,NRAS,CDKN1A,SOS1,ABL2,PIK3R1
hsa04140	Autophagy - animal	24	130	0.49	4.98e-05	9606.ENSP00000215832,9606.ENSP00000225577,9606.ENSP00000246792,9606.ENSP00000247178,9606.ENSP00000256078,9606.ENSP00000263826,9606.ENSP00000263967,9606.ENSP00000266458,9606.ENSP00000268035,9606.ENSP00000288828,9606.ENSP00000298552,9606.ENSP00000302564,9606.ENSP00000307305,9606.ENSP00000352157,9606.ENSP00000358423,9606.ENSP00000358548,9606.ENSP00000361021,9606.ENSP00000378914,9606.ENSP00000381185,…	MAPK1,RPS6KB1,RRAS,ATG14,KRAS,AKT3,PIK3CA,GABARAPL1,IGF1R,WIPI2,TSC1,BCL2L1,DDIT4,MAPK10,RRAGD,NRAS,PTEN,ULK2,BCL2,MTMR3,SMCR8,ATG9A,PIK3R1,TRAF6
hsa05132	Salmonella infection	32	209	0.41	5.18e-05	9606.ENSP00000005257,9606.ENSP00000215832,9606.ENSP00000216185,9606.ENSP00000229795,9606.ENSP00000243298,9606.ENSP00000246792,9606.ENSP00000258198,9606.ENSP00000263826,9606.ENSP00000263967,9606.ENSP00000265165,9606.ENSP00000278568,9606.ENSP00000294742,9606.ENSP00000296137,9606.ENSP00000298316,9606.ENSP00000307939,9606.ENSP00000334373,9606.ENSP00000343701,9606.ENSP00000345083,9606.ENSP00000348828,…	RALA,MAPK1,TXN2,MAPK14,RAB9B,RRAS,DYNC1LI2,AKT3,PIK3CA,LEF1,PAK1,ARPC5,FYCO1,ARF6,GCC2,KPNA4,KPNA1,MAP2K3,ARHGEF26,MAPK10,RAB5B,DYNLT1,PODXL,BCL2,CDC42,PLEKHM1,IKBKB,TRAF6,ARF1,ACTG1,MAP2K6,DYNLL2
hsa04722	Neurotrophin signaling pathway	22	114	0.51	6.22e-05	9606.ENSP00000215832,9606.ENSP00000216373,9606.ENSP00000228437,9606.ENSP00000229795,9606.ENSP00000250559,9606.ENSP00000256078,9606.ENSP00000262995,9606.ENSP00000263826,9606.ENSP00000263967,9606.ENSP00000269321,9606.ENSP00000300574,9606.ENSP00000352157,9606.ENSP00000354927,9606.ENSP00000358548,9606.ENSP00000368884,9606.ENSP00000381185,9606.ENSP00000383118,9606.ENSP00000387784,9606.ENSP00000428056,…	MAPK1,SOS2,PRDM4,MAPK14,RAP1B,KRAS,GAB1,AKT3,PIK3CA,ARHGDIA,CRK,MAPK10,MAP3K3,NRAS,RPS6KA3,BCL2,CDC42,SOS1,PIK3R1,IKBKB,TRAF6,RPS6KA5
hsa04926	Relaxin signaling pathway	23	128	0.48	0.00011	9606.ENSP00000215832,9606.ENSP00000216373,9606.ENSP00000219070,9606.ENSP00000229795,9606.ENSP00000232564,9606.ENSP00000256078,9606.ENSP00000261837,9606.ENSP00000262160,9606.ENSP00000263826,9606.ENSP00000263967,9606.ENSP00000294016,9606.ENSP00000329140,9606.ENSP00000331902,9606.ENSP00000351905,9606.ENSP00000352157,9606.ENSP00000358548,9606.ENSP00000358867,9606.ENSP00000364133,9606.ENSP00000368683,…	MAPK1,SOS2,MMP2,MAPK14,GNB4,KRAS,GNB5,SMAD2,AKT3,PIK3CA,ADCY9,CREB3L2,COL4A5,TGFBR2,MAPK10,NRAS,GNAI3,TGFBR1,EDN1,CREB1,SOS1,PIK3R1,VEGFA
hsa04152	AMPK signaling pathway	22	120	0.49	0.00012	9606.ENSP00000194530,9606.ENSP00000212015,9606.ENSP00000225577,9606.ENSP00000227507,9606.ENSP00000258418,9606.ENSP00000261439,9606.ENSP00000263826,9606.ENSP00000263967,9606.ENSP00000264710,9606.ENSP00000264867,9606.ENSP00000268035,9606.ENSP00000287820,9606.ENSP00000287936,9606.ENSP00000298552,9606.ENSP00000302665,9606.ENSP00000325074,9606.ENSP00000329140,9606.ENSP00000349616,9606.ENSP00000359380,…	STRADB,SIRT1,RPS6KB1,CCND1,CAB39,TBC1D1,AKT3,PIK3CA,RAB10,PPARGC1A,IGF1R,PPARG,HMGCR,TSC1,IGF1,PPP2R2A,CREB3L2,ADIPOR2,SCD,FOXO1,CREB1,PIK3R1
hsa04150	mTOR signaling pathway	25	151	0.44	0.00015	9606.ENSP00000194530,9606.ENSP00000215832,9606.ENSP00000216373,9606.ENSP00000225577,9606.ENSP00000253063,9606.ENSP00000256078,9606.ENSP00000258418,9606.ENSP00000263826,9606.ENSP00000263967,9606.ENSP00000268035,9606.ENSP00000298552,9606.ENSP00000302665,9606.ENSP00000307305,9606.ENSP00000316054,9606.ENSP00000358423,9606.ENSP00000358548,9606.ENSP00000361021,9606.ENSP00000368884,9606.ENSP00000378914,…	STRADB,MAPK1,SOS2,RPS6KB1,SESN2,KRAS,CAB39,AKT3,PIK3CA,IGF1R,TSC1,IGF1,DDIT4,DVL3,RRAGD,NRAS,PTEN,RPS6KA3,ULK2,SOS1,LPIN1,FNIP1,PIK3R1,IKBKB,FZD3
hsa05145	Toxoplasmosis	20	105	0.5	0.00017	9606.ENSP00000215832,9606.ENSP00000225174,9606.ENSP00000229795,9606.ENSP00000258341,9606.ENSP00000263826,9606.ENSP00000264657,9606.ENSP00000302564,9606.ENSP00000329418,9606.ENSP00000343204,9606.ENSP00000345083,9606.ENSP00000352157,9606.ENSP00000358867,9606.ENSP00000360242,9606.ENSP00000381185,9606.ENSP00000386896,9606.ENSP00000400365,9606.ENSP00000430684,9606.ENSP00000433623,9606.ENSP00000454071,…	MAPK1,PPIF,MAPK14,LAMC1,AKT3,STAT3,BCL2L1,SOCS1,JAK1,MAP2K3,MAPK10,GNAI3,XIAP,BCL2,ITGA6,LAMA2,IKBKB,TRAF6,LDLR,MAP2K6
hsa04910	Insulin signaling pathway	23	133	0.46	0.00017	9606.ENSP00000215832,9606.ENSP00000216373,9606.ENSP00000225577,9606.ENSP00000250896,9606.ENSP00000256078,9606.ENSP00000263826,9606.ENSP00000263967,9606.ENSP00000264867,9606.ENSP00000265563,9606.ENSP00000298552,9606.ENSP00000300574,9606.ENSP00000308318,9606.ENSP00000329418,9606.ENSP00000352157,9606.ENSP00000358548,9606.ENSP00000360683,9606.ENSP00000362643,9606.ENSP00000368880,9606.ENSP00000376475,…	MAPK1,SOS2,RPS6KB1,MKNK2,KRAS,AKT3,PIK3CA,PPARGC1A,PRKAR2A,TSC1,CRK,PPP1R3B,SOCS1,MAPK10,NRAS,PTPN1,PHKA1,FOXO1,PRKAR1A,FLOT2,SOS1,PIK3R1,IKBKB
hsa05219	Bladder cancer	12	41	0.69	0.00022	9606.ENSP00000215832,9606.ENSP00000219070,9606.ENSP00000227507,9606.ENSP00000256078,9606.ENSP00000260356,9606.ENSP00000262904,9606.ENSP00000345571,9606.ENSP00000355249,9606.ENSP00000358548,9606.ENSP00000384849,9606.ENSP00000478570,9606.ENSP00000479667	MAPK1,MMP2,CCND1,KRAS,THBS1,E2F3,E2F1,E2F2,NRAS,CDKN1A,VEGFA,RPS6KA5
hsa04935	Growth hormone synthesis, secretion and action	21	118	0.47	0.00023	9606.ENSP00000215832,9606.ENSP00000216373,9606.ENSP00000229795,9606.ENSP00000256078,9606.ENSP00000263826,9606.ENSP00000263967,9606.ENSP00000264657,9606.ENSP00000266376,9606.ENSP00000294016,9606.ENSP00000300574,9606.ENSP00000302665,9606.ENSP00000329140,9606.ENSP00000329418,9606.ENSP00000345083,9606.ENSP00000352157,9606.ENSP00000358548,9606.ENSP00000358867,9606.ENSP00000387699,9606.ENSP00000387784,…	MAPK1,SOS2,MAPK14,KRAS,AKT3,PIK3CA,STAT3,CACNA1C,ADCY9,CRK,IGF1,CREB3L2,SOCS1,MAP2K3,MAPK10,NRAS,GNAI3,CREB1,SOS1,PIK3R1,MAP2K6
hsa04072	Phospholipase D signaling pathway	24	147	0.44	0.00023	9606.ENSP00000005257,9606.ENSP00000215832,9606.ENSP00000216373,9606.ENSP00000246792,9606.ENSP00000256078,9606.ENSP00000257290,9606.ENSP00000261799,9606.ENSP00000262995,9606.ENSP00000263826,9606.ENSP00000263967,9606.ENSP00000272519,9606.ENSP00000288135,9606.ENSP00000294016,9606.ENSP00000298316,9606.ENSP00000298552,9606.ENSP00000330382,9606.ENSP00000358548,9606.ENSP00000360296,9606.ENSP00000381140,…	RALA,MAPK1,SOS2,RRAS,KRAS,PDGFRA,PDGFRB,GAB1,AKT3,PIK3CA,RALB,KIT,ADCY9,ARF6,TSC1,PDGFB,NRAS,PPAP2B,AGPAT3,SOS1,GNA13,PDGFC,PIK3R1,ARF1
hsa04360	Axon guidance	27	177	0.41	0.00023	9606.ENSP00000215832,9606.ENSP00000245323,9606.ENSP00000246792,9606.ENSP00000256078,9606.ENSP00000263967,9606.ENSP00000274376,9606.ENSP00000278568,9606.ENSP00000281821,9606.ENSP00000298159,9606.ENSP00000306844,9606.ENSP00000309539,9606.ENSP00000317272,9606.ENSP00000324857,9606.ENSP00000340998,9606.ENSP00000355809,9606.ENSP00000358309,9606.ENSP00000358548,9606.ENSP00000358867,9606.ENSP00000360672,…	MAPK1,EFNB2,RRAS,KRAS,PIK3CA,RASA1,PAK1,EPHA4,CFL2,SEMA4C,DPYSL2,MET,SEMA6D,NTN4,ENAH,EPHA7,NRAS,GNAI3,PARD6B,RGS3,BMPR2,EPHB2,TRPC3,PLXNA1,CDC42,PIK3R1,FZD3
hsa05167	Kaposi sarcoma-associated herpesvirus infection	28	187	0.4	0.00023	9606.ENSP00000215832,9606.ENSP00000227507,9606.ENSP00000229795,9606.ENSP00000232564,9606.ENSP00000247178,9606.ENSP00000256078,9606.ENSP00000261837,9606.ENSP00000262904,9606.ENSP00000263826,9606.ENSP00000263967,9606.ENSP00000264498,9606.ENSP00000264657,9606.ENSP00000265165,9606.ENSP00000265734,9606.ENSP00000266458,9606.ENSP00000330382,9606.ENSP00000343204,9606.ENSP00000343957,9606.ENSP00000345571,…	MAPK1,CCND1,MAPK14,GNB4,ATG14,KRAS,GNB5,E2F3,AKT3,PIK3CA,FGF2,STAT3,LEF1,CDK6,GABARAPL1,PDGFB,JAK1,IFNAR2,E2F1,MAPK10,E2F2,NRAS,CDKN1A,CREB1,PIK3R1,IKBKB,MAP2K6,VEGFA
hsa04110	Cell cycle	21	120	0.47	0.00028	9606.ENSP00000209728,9606.ENSP00000227507,9606.ENSP00000228872,9606.ENSP00000261254,9606.ENSP00000262133,9606.ENSP00000262160,9606.ENSP00000262643,9606.ENSP00000262904,9606.ENSP00000265734,9606.ENSP00000303706,9606.ENSP00000323421,9606.ENSP00000341551,9606.ENSP00000345571,9606.ENSP00000355249,9606.ENSP00000379287,9606.ENSP00000384849,9606.ENSP00000388648,9606.ENSP00000398124,9606.ENSP00000402084,…	CDC6,CCND1,CDKN1B,CCND2,RBL2,SMAD2,CCNE1,E2F3,CDK6,CDC25A,SMC1A,SMAD4,E2F1,E2F2,YWHAZ,CDKN1A,CHEK1,E2F5,WEE1,CCNE2,CDC27
hsa04630	JAK-STAT signaling pathway	25	160	0.42	0.00029	9606.ENSP00000216373,9606.ENSP00000227507,9606.ENSP00000257290,9606.ENSP00000261254,9606.ENSP00000261799,9606.ENSP00000263409,9606.ENSP00000263826,9606.ENSP00000263967,9606.ENSP00000264657,9606.ENSP00000300134,9606.ENSP00000302564,9606.ENSP00000304915,9606.ENSP00000305133,9606.ENSP00000329418,9606.ENSP00000330382,9606.ENSP00000343204,9606.ENSP00000343957,9606.ENSP00000358022,9606.ENSP00000368265,…	SOS2,CCND1,PDGFRA,CCND2,PDGFRB,LIFR,AKT3,PIK3CA,STAT3,STAT6,BCL2L1,IL13,SOCS5,SOCS1,PDGFB,JAK1,IFNAR2,MCL1,CNTFR,SOCS6,BCL2,CDKN1A,SOS1,PIK3R1,PRLR
hsa04914	Progesterone-mediated oocyte maturation	18	94	0.5	0.00034	9606.ENSP00000215832,9606.ENSP00000216911,9606.ENSP00000229795,9606.ENSP00000256078,9606.ENSP00000263826,9606.ENSP00000263967,9606.ENSP00000265085,9606.ENSP00000268035,9606.ENSP00000294016,9606.ENSP00000302665,9606.ENSP00000303706,9606.ENSP00000352157,9606.ENSP00000358867,9606.ENSP00000368884,9606.ENSP00000428056,9606.ENSP00000434614,9606.ENSP00000443985,9606.ENSP00000482128	MAPK1,AURKA,MAPK14,KRAS,AKT3,PIK3CA,CPEB4,IGF1R,ADCY9,IGF1,CDC25A,MAPK10,GNAI3,RPS6KA3,PIK3R1,CDC27,CPEB2,CPEB3
hsa05231	Choline metabolism in cancer	18	96	0.5	0.00042	9606.ENSP00000215832,9606.ENSP00000216373,9606.ENSP00000225577,9606.ENSP00000256078,9606.ENSP00000257290,9606.ENSP00000261799,9606.ENSP00000263826,9606.ENSP00000263967,9606.ENSP00000298552,9606.ENSP00000329357,9606.ENSP00000330382,9606.ENSP00000352157,9606.ENSP00000358548,9606.ENSP00000360296,9606.ENSP00000363852,9606.ENSP00000387784,9606.ENSP00000422464,9606.ENSP00000428056	MAPK1,SOS2,RPS6KB1,KRAS,PDGFRA,PDGFRB,AKT3,PIK3CA,TSC1,SP1,PDGFB,MAPK10,NRAS,PPAP2B,SLC44A1,SOS1,PDGFC,PIK3R1
hsa04144	Endocytosis	32	241	0.35	0.00046	9606.ENSP00000238497,9606.ENSP00000257290,9606.ENSP00000262160,9606.ENSP00000262215,9606.ENSP00000264710,9606.ENSP00000268035,9606.ENSP00000287727,9606.ENSP00000294742,9606.ENSP00000298316,9606.ENSP00000302895,9606.ENSP00000307078,9606.ENSP00000331342,9606.ENSP00000337159,9606.ENSP00000342755,9606.ENSP00000347464,9606.ENSP00000349437,9606.ENSP00000351905,9606.ENSP00000353444,9606.ENSP00000354621,…	VPS4B,PDGFRA,SMAD2,ARFGEF1,RAB10,IGF1R,ZFYVE9,ARPC5,ARF6,ARAP2,KIF5B,RAB11FIP1,ZFYVE16,RNF41,GIT2,IGF2R,TGFBR2,RAB5B,SMURF1,CAPZA2,PARD6B,VPS26A,TGFBR1,SH3KBP1,CDC42,KIF5A,SPG20,TRAF6,ARF1,LDLR,IQSEC1,RAB11FIP4
hsa05160	Hepatitis C	24	156	0.41	0.00047	9606.ENSP00000215832,9606.ENSP00000216373,9606.ENSP00000227507,9606.ENSP00000256078,9606.ENSP00000262904,9606.ENSP00000263826,9606.ENSP00000263967,9606.ENSP00000264657,9606.ENSP00000265734,9606.ENSP00000295522,9606.ENSP00000325074,9606.ENSP00000343204,9606.ENSP00000343957,9606.ENSP00000345571,9606.ENSP00000355249,9606.ENSP00000358548,9606.ENSP00000379287,9606.ENSP00000384849,9606.ENSP00000387784,…	MAPK1,SOS2,CCND1,KRAS,E2F3,AKT3,PIK3CA,STAT3,CDK6,CLDN1,PPP2R2A,JAK1,IFNAR2,E2F1,E2F2,NRAS,YWHAZ,CDKN1A,SOS1,PIK3R1,IKBKB,TRAF6,CLDN2,LDLR
hsa05169	Epstein-Barr virus infection	27	193	0.37	0.00073	9606.ENSP00000219313,9606.ENSP00000227507,9606.ENSP00000228872,9606.ENSP00000229795,9606.ENSP00000261254,9606.ENSP00000262643,9606.ENSP00000262904,9606.ENSP00000263826,9606.ENSP00000263967,9606.ENSP00000264657,9606.ENSP00000265734,9606.ENSP00000343204,9606.ENSP00000343957,9606.ENSP00000345083,9606.ENSP00000345571,9606.ENSP00000352157,9606.ENSP00000355249,9606.ENSP00000376943,9606.ENSP00000381185,…	PSMD7,CCND1,CDKN1B,MAPK14,CCND2,CCNE1,E2F3,AKT3,PIK3CA,STAT3,CDK6,JAK1,IFNAR2,MAP2K3,E2F1,MAPK10,E2F2,BCL2L11,BCL2,RUNX3,NCOR2,CDKN1A,PIK3R1,CCNE2,IKBKB,TRAF6,MAP2K6
hsa04380	Osteoclast differentiation	20	122	0.44	0.00082	9606.ENSP00000215832,9606.ENSP00000229795,9606.ENSP00000263826,9606.ENSP00000263967,9606.ENSP00000286301,9606.ENSP00000287820,9606.ENSP00000295600,9606.ENSP00000310170,9606.ENSP00000329418,9606.ENSP00000343204,9606.ENSP00000343957,9606.ENSP00000351905,9606.ENSP00000352157,9606.ENSP00000364133,9606.ENSP00000387699,9606.ENSP00000428056,9606.ENSP00000430684,9606.ENSP00000433623,9606.ENSP00000452786,…	MAPK1,MAPK14,AKT3,PIK3CA,CSF1R,PPARG,MITF,FOSL1,SOCS1,JAK1,IFNAR2,TGFBR2,MAPK10,TGFBR1,CREB1,PIK3R1,IKBKB,TRAF6,ITGB3,MAP2K6
hsa04066	HIF-1 signaling pathway	18	106	0.45	0.0012	9606.ENSP00000215832,9606.ENSP00000225577,9606.ENSP00000228872,9606.ENSP00000250457,9606.ENSP00000250896,9606.ENSP00000256474,9606.ENSP00000263826,9606.ENSP00000263967,9606.ENSP00000264657,9606.ENSP00000268035,9606.ENSP00000302665,9606.ENSP00000368683,9606.ENSP00000381185,9606.ENSP00000384849,9606.ENSP00000428056,9606.ENSP00000444856,9606.ENSP00000478121,9606.ENSP00000478570	MAPK1,RPS6KB1,CDKN1B,EGLN3,MKNK2,VHL,AKT3,PIK3CA,STAT3,IGF1R,IGF1,EDN1,BCL2,CDKN1A,PIK3R1,CUL2,TCEB1,VEGFA
hsa05235	PD-L1 expression and PD-1 checkpoint pathway in cancer	16	88	0.48	0.0013	9606.ENSP00000215832,9606.ENSP00000225577,9606.ENSP00000229795,9606.ENSP00000256078,9606.ENSP00000263826,9606.ENSP00000263967,9606.ENSP00000264657,9606.ENSP00000343204,9606.ENSP00000345083,9606.ENSP00000354927,9606.ENSP00000358548,9606.ENSP00000361021,9606.ENSP00000428056,9606.ENSP00000430684,9606.ENSP00000433623,9606.ENSP00000468348	MAPK1,RPS6KB1,MAPK14,KRAS,AKT3,PIK3CA,STAT3,JAK1,MAP2K3,MAP3K3,NRAS,PTEN,PIK3R1,IKBKB,TRAF6,MAP2K6
hsa05203	Viral carcinogenesis	25	182	0.36	0.0015	9606.ENSP00000215832,9606.ENSP00000227507,9606.ENSP00000228872,9606.ENSP00000237264,9606.ENSP00000252699,9606.ENSP00000256078,9606.ENSP00000261254,9606.ENSP00000262133,9606.ENSP00000262643,9606.ENSP00000263754,9606.ENSP00000263967,9606.ENSP00000264657,9606.ENSP00000265734,9606.ENSP00000295025,9606.ENSP00000329140,9606.ENSP00000343204,9606.ENSP00000358548,9606.ENSP00000379287,9606.ENSP00000382840,…	MAPK1,CCND1,CDKN1B,TBPL1,ACTN4,KRAS,CCND2,RBL2,CCNE1,KAT2B,PIK3CA,STAT3,CDK6,REL,CREB3L2,JAK1,NRAS,YWHAZ,DDX3X,CDC42,CDKN1A,CREB1,CHEK1,PIK3R1,CCNE2
hsa05418	Fluid shear stress and atherosclerosis	20	130	0.41	0.0016	9606.ENSP00000216185,9606.ENSP00000219070,9606.ENSP00000229795,9606.ENSP00000241416,9606.ENSP00000261023,9606.ENSP00000263640,9606.ENSP00000263826,9606.ENSP00000263967,9606.ENSP00000330382,9606.ENSP00000352157,9606.ENSP00000363708,9606.ENSP00000368683,9606.ENSP00000381185,9606.ENSP00000405965,9606.ENSP00000428056,9606.ENSP00000430684,9606.ENSP00000452786,9606.ENSP00000458162,9606.ENSP00000468348,…	TXN2,MMP2,MAPK14,ACVR2A,ITGAV,ACVR1,AKT3,PIK3CA,PDGFB,MAPK10,BMPR2,EDN1,BCL2,SUMO2,PIK3R1,IKBKB,ITGB3,ACTG1,MAP2K6,VEGFA
hsa04934	Cushing syndrome	22	153	0.38	0.0019	9606.ENSP00000215832,9606.ENSP00000227507,9606.ENSP00000228872,9606.ENSP00000250559,9606.ENSP00000262643,9606.ENSP00000262904,9606.ENSP00000265165,9606.ENSP00000265734,9606.ENSP00000266376,9606.ENSP00000294016,9606.ENSP00000316054,9606.ENSP00000329140,9606.ENSP00000329357,9606.ENSP00000345571,9606.ENSP00000355249,9606.ENSP00000358867,9606.ENSP00000384849,9606.ENSP00000387699,9606.ENSP00000429089,…	MAPK1,CCND1,CDKN1B,RAP1B,CCNE1,E2F3,LEF1,CDK6,CACNA1C,ADCY9,DVL3,CREB3L2,SP1,E2F1,E2F2,GNAI3,CDKN1A,CREB1,CCNE2,KMT2A,FZD3,LDLR
hsa05213	Endometrial cancer	12	57	0.55	0.0023	9606.ENSP00000215832,9606.ENSP00000216373,9606.ENSP00000227507,9606.ENSP00000256078,9606.ENSP00000263826,9606.ENSP00000263967,9606.ENSP00000265165,9606.ENSP00000358548,9606.ENSP00000361021,9606.ENSP00000384849,9606.ENSP00000387784,9606.ENSP00000428056	MAPK1,SOS2,CCND1,KRAS,AKT3,PIK3CA,LEF1,NRAS,PTEN,CDKN1A,SOS1,PIK3R1
hsa04664	Fc epsilon RI signaling pathway	13	66	0.52	0.0023	9606.ENSP00000215832,9606.ENSP00000216373,9606.ENSP00000229795,9606.ENSP00000256078,9606.ENSP00000263826,9606.ENSP00000263967,9606.ENSP00000304915,9606.ENSP00000345083,9606.ENSP00000352157,9606.ENSP00000358548,9606.ENSP00000387784,9606.ENSP00000428056,9606.ENSP00000468348	MAPK1,SOS2,MAPK14,KRAS,AKT3,PIK3CA,IL13,MAP2K3,MAPK10,NRAS,SOS1,PIK3R1,MAP2K6
hsa04931	Insulin resistance	17	107	0.42	0.003	9606.ENSP00000225577,9606.ENSP00000263826,9606.ENSP00000263967,9606.ENSP00000264657,9606.ENSP00000264867,9606.ENSP00000308318,9606.ENSP00000312649,9606.ENSP00000329140,9606.ENSP00000352157,9606.ENSP00000360683,9606.ENSP00000361021,9606.ENSP00000362824,9606.ENSP00000368880,9606.ENSP00000368884,9606.ENSP00000387699,9606.ENSP00000428056,9606.ENSP00000430684	RPS6KB1,AKT3,PIK3CA,STAT3,PPARGC1A,PPP1R3B,PPARGC1B,CREB3L2,MAPK10,PTPN1,PTEN,OGT,FOXO1,RPS6KA3,CREB1,PIK3R1,IKBKB
hsa05170	Human immunodeficiency virus 1 infection	26	204	0.33	0.003	9606.ENSP00000215832,9606.ENSP00000225577,9606.ENSP00000229795,9606.ENSP00000232564,9606.ENSP00000256078,9606.ENSP00000261837,9606.ENSP00000263826,9606.ENSP00000263967,9606.ENSP00000278568,9606.ENSP00000298159,9606.ENSP00000300574,9606.ENSP00000302564,9606.ENSP00000336666,9606.ENSP00000345083,9606.ENSP00000352157,9606.ENSP00000358548,9606.ENSP00000358867,9606.ENSP00000376808,9606.ENSP00000381185,…	MAPK1,RPS6KB1,MAPK14,GNB4,KRAS,GNB5,AKT3,PIK3CA,PAK1,CFL2,CRK,BCL2L1,AP1S1,MAP2K3,MAPK10,NRAS,GNAI3,CUL5,BCL2,CHEK1,WEE1,PIK3R1,IKBKB,TRAF6,MAP2K6,TCEB1
hsa04912	GnRH signaling pathway	15	89	0.45	0.0036	9606.ENSP00000215832,9606.ENSP00000216373,9606.ENSP00000219070,9606.ENSP00000229795,9606.ENSP00000256078,9606.ENSP00000266376,9606.ENSP00000294016,9606.ENSP00000345083,9606.ENSP00000352157,9606.ENSP00000354927,9606.ENSP00000358548,9606.ENSP00000383118,9606.ENSP00000387246,9606.ENSP00000387784,9606.ENSP00000468348	MAPK1,SOS2,MMP2,MAPK14,KRAS,CACNA1C,ADCY9,MAP2K3,MAPK10,MAP3K3,NRAS,CDC42,MAP3K2,SOS1,MAP2K6
hsa04371	Apelin signaling pathway	19	131	0.38	0.0039	9606.ENSP00000215832,9606.ENSP00000225577,9606.ENSP00000227507,9606.ENSP00000232564,9606.ENSP00000246792,9606.ENSP00000256078,9606.ENSP00000261837,9606.ENSP00000262160,9606.ENSP00000263826,9606.ENSP00000264867,9606.ENSP00000266458,9606.ENSP00000271555,9606.ENSP00000294016,9606.ENSP00000341551,9606.ENSP00000358548,9606.ENSP00000358867,9606.ENSP00000364133,9606.ENSP00000384763,9606.ENSP00000400717	MAPK1,RPS6KB1,CCND1,GNB4,RRAS,KRAS,GNB5,SMAD2,AKT3,PPARGC1A,GABARAPL1,MEF2D,ADCY9,SMAD4,NRAS,GNAI3,TGFBR1,SLC8A1,GNA13
hsa04915	Estrogen signaling pathway	19	133	0.38	0.0045	9606.ENSP00000215832,9606.ENSP00000216373,9606.ENSP00000219070,9606.ENSP00000256078,9606.ENSP00000263826,9606.ENSP00000263967,9606.ENSP00000294016,9606.ENSP00000295400,9606.ENSP00000329140,9606.ENSP00000329357,9606.ENSP00000337675,9606.ENSP00000358548,9606.ENSP00000358867,9606.ENSP00000361066,9606.ENSP00000381185,9606.ENSP00000387699,9606.ENSP00000387784,9606.ENSP00000405330,9606.ENSP00000428056	MAPK1,SOS2,MMP2,KRAS,AKT3,PIK3CA,ADCY9,TGFA,CREB3L2,SP1,EBAG9,NRAS,GNAI3,NCOA3,BCL2,CREB1,SOS1,ESR1,PIK3R1
hsa05412	Arrhythmogenic right ventricular cardiomyopathy	13	76	0.46	0.0066	9606.ENSP00000222573,9606.ENSP00000261023,9606.ENSP00000264741,9606.ENSP00000265165,9606.ENSP00000266376,9606.ENSP00000280904,9606.ENSP00000384763,9606.ENSP00000386896,9606.ENSP00000400365,9606.ENSP00000438949,9606.ENSP00000440045,9606.ENSP00000452786,9606.ENSP00000458162	ITGB8,ITGAV,ITGA9,LEF1,CACNA1C,DSC2,SLC8A1,ITGA6,LAMA2,CACNB4,ATP2A2,ITGB3,ACTG1
hsa05162	Measles	19	138	0.36	0.0066	9606.ENSP00000227507,9606.ENSP00000228872,9606.ENSP00000243298,9606.ENSP00000261254,9606.ENSP00000262643,9606.ENSP00000263826,9606.ENSP00000263967,9606.ENSP00000264657,9606.ENSP00000265734,9606.ENSP00000302564,9606.ENSP00000343204,9606.ENSP00000343957,9606.ENSP00000352157,9606.ENSP00000381185,9606.ENSP00000404503,9606.ENSP00000428056,9606.ENSP00000429089,9606.ENSP00000430684,9606.ENSP00000433623	CCND1,CDKN1B,RAB9B,CCND2,CCNE1,AKT3,PIK3CA,STAT3,CDK6,BCL2L1,JAK1,IFNAR2,MAPK10,BCL2,BBC3,PIK3R1,CCNE2,IKBKB,TRAF6
hsa05131	Shigellosis	26	218	0.3	0.0066	9606.ENSP00000215832,9606.ENSP00000225577,9606.ENSP00000229795,9606.ENSP00000247178,9606.ENSP00000252699,9606.ENSP00000263826,9606.ENSP00000263967,9606.ENSP00000266458,9606.ENSP00000288828,9606.ENSP00000294742,9606.ENSP00000298316,9606.ENSP00000300574,9606.ENSP00000302564,9606.ENSP00000339835,9606.ENSP00000352157,9606.ENSP00000358423,9606.ENSP00000368880,9606.ENSP00000381185,9606.ENSP00000383118,…	MAPK1,RPS6KB1,MAPK14,ATG14,ACTN4,AKT3,PIK3CA,GABARAPL1,WIPI2,ARPC5,ARF6,CRK,BCL2L1,H3F3C,MAPK10,RRAGD,FOXO1,BCL2,CDC42,PIK3R1,IKBKB,TRAF6,ARF1,ACTG1,RPS6KA5,SEPT2
hsa04919	Thyroid hormone signaling pathway	17	119	0.38	0.0077	9606.ENSP00000215832,9606.ENSP00000227507,9606.ENSP00000256078,9606.ENSP00000261023,9606.ENSP00000263754,9606.ENSP00000263826,9606.ENSP00000263967,9606.ENSP00000323720,9606.ENSP00000354643,9606.ENSP00000358548,9606.ENSP00000361066,9606.ENSP00000368880,9606.ENSP00000405330,9606.ENSP00000428056,9606.ENSP00000440045,9606.ENSP00000452786,9606.ENSP00000458162	MAPK1,CCND1,KRAS,ITGAV,KAT2B,AKT3,PIK3CA,MED14,DIO1,NRAS,NCOA3,FOXO1,ESR1,PIK3R1,ATP2A2,ITGB3,ACTG1
hsa05230	Central carbon metabolism in cancer	12	69	0.46	0.0084	9606.ENSP00000215832,9606.ENSP00000256078,9606.ENSP00000257290,9606.ENSP00000261799,9606.ENSP00000263826,9606.ENSP00000263967,9606.ENSP00000288135,9606.ENSP00000317272,9606.ENSP00000358548,9606.ENSP00000361021,9606.ENSP00000393312,9606.ENSP00000428056	MAPK1,KRAS,PDGFRA,PDGFRB,AKT3,PIK3CA,KIT,MET,NRAS,PTEN,FGFR1,PIK3R1
hsa05410	Hypertrophic cardiomyopathy	14	89	0.42	0.0085	9606.ENSP00000222573,9606.ENSP00000261023,9606.ENSP00000264741,9606.ENSP00000266376,9606.ENSP00000290378,9606.ENSP00000302665,9606.ENSP00000368683,9606.ENSP00000384763,9606.ENSP00000386896,9606.ENSP00000400365,9606.ENSP00000438949,9606.ENSP00000440045,9606.ENSP00000452786,9606.ENSP00000458162	ITGB8,ITGAV,ITGA9,CACNA1C,ACTC1,IGF1,EDN1,SLC8A1,ITGA6,LAMA2,CACNB4,ATP2A2,ITGB3,ACTG1
hsa04213	Longevity regulating pathway - multiple species	11	61	0.48	0.0097	9606.ENSP00000212015,9606.ENSP00000225577,9606.ENSP00000256078,9606.ENSP00000263826,9606.ENSP00000263967,9606.ENSP00000268035,9606.ENSP00000294016,9606.ENSP00000302665,9606.ENSP00000358548,9606.ENSP00000368880,9606.ENSP00000428056	SIRT1,RPS6KB1,KRAS,AKT3,PIK3CA,IGF1R,ADCY9,IGF1,NRAS,FOXO1,PIK3R1
hsa04668	TNF signaling pathway	16	112	0.38	0.0099	9606.ENSP00000164227,9606.ENSP00000215832,9606.ENSP00000229795,9606.ENSP00000245414,9606.ENSP00000259371,9606.ENSP00000263826,9606.ENSP00000263967,9606.ENSP00000329140,9606.ENSP00000345083,9606.ENSP00000352157,9606.ENSP00000368683,9606.ENSP00000387699,9606.ENSP00000428056,9606.ENSP00000430684,9606.ENSP00000468348,9606.ENSP00000479667	BCL3,MAPK1,MAPK14,IRF1,DAB2IP,AKT3,PIK3CA,CREB3L2,MAP2K3,MAPK10,EDN1,CREB1,PIK3R1,IKBKB,MAP2K6,RPS6KA5
hsa04120	Ubiquitin mediated proteolysis	18	135	0.35	0.0107	9606.ENSP00000215574,9606.ENSP00000256474,9606.ENSP00000263228,9606.ENSP00000281708,9606.ENSP00000309198,9606.ENSP00000329418,9606.ENSP00000348056,9606.ENSP00000354621,9606.ENSP00000360242,9606.ENSP00000373696,9606.ENSP00000376808,9606.ENSP00000387362,9606.ENSP00000408292,9606.ENSP00000429084,9606.ENSP00000433623,9606.ENSP00000434614,9606.ENSP00000444856,9606.ENSP00000478121	CDC34,VHL,UBE2R2,FBXW7,UBE3C,SOCS1,UBE2I,SMURF1,XIAP,TRIP12,CUL5,UBE4A,TRIM32,UBR5,TRAF6,CDC27,CUL2,TCEB1
hsa04137	Mitophagy - animal	11	63	0.46	0.0117	9606.ENSP00000221543,9606.ENSP00000246792,9606.ENSP00000256078,9606.ENSP00000266458,9606.ENSP00000295600,9606.ENSP00000302564,9606.ENSP00000329357,9606.ENSP00000345571,9606.ENSP00000352157,9606.ENSP00000358548,9606.ENSP00000386710	TBC1D17,RRAS,KRAS,GABARAPL1,MITF,BCL2L1,SP1,E2F1,MAPK10,NRAS,ATG9A
hsa05216	Thyroid cancer	8	36	0.57	0.0119	9606.ENSP00000215832,9606.ENSP00000227507,9606.ENSP00000256078,9606.ENSP00000263102,9606.ENSP00000265165,9606.ENSP00000287820,9606.ENSP00000358548,9606.ENSP00000384849	MAPK1,CCND1,KRAS,CCDC6,LEF1,PPARG,NRAS,CDKN1A
hsa04071	Sphingolipid signaling pathway	16	116	0.36	0.0129	9606.ENSP00000215832,9606.ENSP00000229795,9606.ENSP00000256078,9606.ENSP00000262554,9606.ENSP00000263826,9606.ENSP00000263967,9606.ENSP00000325074,9606.ENSP00000342609,9606.ENSP00000352157,9606.ENSP00000358548,9606.ENSP00000358867,9606.ENSP00000361021,9606.ENSP00000381185,9606.ENSP00000400717,9606.ENSP00000411012,9606.ENSP00000428056	MAPK1,MAPK14,KRAS,SPTLC1,AKT3,PIK3CA,PPP2R2A,ACER2,MAPK10,NRAS,GNAI3,PTEN,BCL2,GNA13,NSMAF,PIK3R1
hsa05414	Dilated cardiomyopathy	14	95	0.39	0.0132	9606.ENSP00000222573,9606.ENSP00000261023,9606.ENSP00000264741,9606.ENSP00000266376,9606.ENSP00000290378,9606.ENSP00000294016,9606.ENSP00000302665,9606.ENSP00000384763,9606.ENSP00000386896,9606.ENSP00000400365,9606.ENSP00000438949,9606.ENSP00000440045,9606.ENSP00000452786,9606.ENSP00000458162	ITGB8,ITGAV,ITGA9,CACNA1C,ACTC1,ADCY9,IGF1,SLC8A1,ITGA6,LAMA2,CACNB4,ATP2A2,ITGB3,ACTG1
hsa04390	Hippo signaling pathway	19	153	0.32	0.0158	9606.ENSP00000227507,9606.ENSP00000261254,9606.ENSP00000262160,9606.ENSP00000265165,9606.ENSP00000316054,9606.ENSP00000325074,9606.ENSP00000341551,9606.ENSP00000344666,9606.ENSP00000351905,9606.ENSP00000360672,9606.ENSP00000363492,9606.ENSP00000363708,9606.ENSP00000364133,9606.ENSP00000379287,9606.ENSP00000404503,9606.ENSP00000426568,9606.ENSP00000437489,9606.ENSP00000458162,9606.ENSP00000478927	CCND1,CCND2,SMAD2,LEF1,DVL3,PPP2R2A,SMAD4,NF2,TGFBR2,PARD6B,GDF5,BMPR2,TGFBR1,YWHAZ,BBC3,SMAD1,FZD3,ACTG1,YAP1
hsa04114	Oocyte meiosis	16	120	0.35	0.0167	9606.ENSP00000215832,9606.ENSP00000216911,9606.ENSP00000229795,9606.ENSP00000262643,9606.ENSP00000265085,9606.ENSP00000268035,9606.ENSP00000294016,9606.ENSP00000302665,9606.ENSP00000323421,9606.ENSP00000358770,9606.ENSP00000368884,9606.ENSP00000379287,9606.ENSP00000429089,9606.ENSP00000434614,9606.ENSP00000443985,9606.ENSP00000482128	MAPK1,AURKA,MAPK14,CCNE1,CPEB4,IGF1R,ADCY9,IGF1,SMC1A,SLK,RPS6KA3,YWHAZ,CCNE2,CDC27,CPEB2,CPEB3
hsa04210	Apoptosis	17	132	0.33	0.0175	9606.ENSP00000215832,9606.ENSP00000256078,9606.ENSP00000259371,9606.ENSP00000263826,9606.ENSP00000263967,9606.ENSP00000302564,9606.ENSP00000352157,9606.ENSP00000358022,9606.ENSP00000358548,9606.ENSP00000360242,9606.ENSP00000376943,9606.ENSP00000381185,9606.ENSP00000404503,9606.ENSP00000428056,9606.ENSP00000430684,9606.ENSP00000448665,9606.ENSP00000458162	MAPK1,KRAS,DAB2IP,AKT3,PIK3CA,BCL2L1,MAPK10,MCL1,NRAS,XIAP,BCL2L11,BCL2,BBC3,PIK3R1,IKBKB,DDIT3,ACTG1
hsa04725	Cholinergic synapse	15	110	0.36	0.0177	9606.ENSP00000215832,9606.ENSP00000232564,9606.ENSP00000243457,9606.ENSP00000256078,9606.ENSP00000261837,9606.ENSP00000263826,9606.ENSP00000263967,9606.ENSP00000266376,9606.ENSP00000294016,9606.ENSP00000329140,9606.ENSP00000358548,9606.ENSP00000358867,9606.ENSP00000381185,9606.ENSP00000387699,9606.ENSP00000428056	MAPK1,GNB4,KCNJ2,KRAS,GNB5,AKT3,PIK3CA,CACNA1C,ADCY9,CREB3L2,NRAS,GNAI3,BCL2,CREB1,PIK3R1
hsa05135	Yersinia infection	16	125	0.33	0.023	9606.ENSP00000215832,9606.ENSP00000229795,9606.ENSP00000263826,9606.ENSP00000263967,9606.ENSP00000298316,9606.ENSP00000300574,9606.ENSP00000345083,9606.ENSP00000347464,9606.ENSP00000352157,9606.ENSP00000368884,9606.ENSP00000383118,9606.ENSP00000428056,9606.ENSP00000430684,9606.ENSP00000433623,9606.ENSP00000458162,9606.ENSP00000468348	MAPK1,MAPK14,AKT3,PIK3CA,ARF6,CRK,MAP2K3,GIT2,MAPK10,RPS6KA3,CDC42,PIK3R1,IKBKB,TRAF6,ACTG1,MAP2K6
hsa04928	Parathyroid hormone synthesis, secretion and action	14	103	0.36	0.0234	9606.ENSP00000215832,9606.ENSP00000271555,9606.ENSP00000294016,9606.ENSP00000329140,9606.ENSP00000329357,9606.ENSP00000332116,9606.ENSP00000345502,9606.ENSP00000358867,9606.ENSP00000360493,9606.ENSP00000381185,9606.ENSP00000384849,9606.ENSP00000387699,9606.ENSP00000393312,9606.ENSP00000400717	MAPK1,MEF2D,ADCY9,CREB3L2,SP1,PDE4B,PDE4D,GNAI3,RUNX2,BCL2,CDKN1A,CREB1,FGFR1,GNA13
hsa00514	Other types of O-glycan biosynthesis	8	43	0.49	0.0272	9606.ENSP00000222725,9606.ENSP00000265000,9606.ENSP00000336729,9606.ENSP00000362824,9606.ENSP00000369055,9606.ENSP00000373206,9606.ENSP00000381666,9606.ENSP00000389176	LFNG,GALNT7,GALNT16,OGT,B4GALT1,EOGT,GXYLT1,C1GALT1
hsa04916	Melanogenesis	13	95	0.36	0.0287	9606.ENSP00000215832,9606.ENSP00000256078,9606.ENSP00000265165,9606.ENSP00000288135,9606.ENSP00000294016,9606.ENSP00000295600,9606.ENSP00000316054,9606.ENSP00000329140,9606.ENSP00000358548,9606.ENSP00000358867,9606.ENSP00000368683,9606.ENSP00000387699,9606.ENSP00000437489	MAPK1,KRAS,LEF1,KIT,ADCY9,MITF,DVL3,CREB3L2,NRAS,GNAI3,EDN1,CREB1,FZD3
hsa04540	Gap junction	12	87	0.36	0.0356	9606.ENSP00000215832,9606.ENSP00000216373,9606.ENSP00000256078,9606.ENSP00000257290,9606.ENSP00000261799,9606.ENSP00000294016,9606.ENSP00000330382,9606.ENSP00000358548,9606.ENSP00000358867,9606.ENSP00000387246,9606.ENSP00000387784,9606.ENSP00000422464	MAPK1,SOS2,KRAS,PDGFRA,PDGFRB,ADCY9,PDGFB,NRAS,GNAI3,MAP3K2,SOS1,PDGFC
hsa05142	Chagas disease	13	99	0.34	0.0377	9606.ENSP00000215832,9606.ENSP00000229795,9606.ENSP00000262160,9606.ENSP00000263826,9606.ENSP00000263967,9606.ENSP00000325074,9606.ENSP00000351905,9606.ENSP00000352157,9606.ENSP00000358867,9606.ENSP00000364133,9606.ENSP00000428056,9606.ENSP00000430684,9606.ENSP00000433623	MAPK1,MAPK14,SMAD2,AKT3,PIK3CA,PPP2R2A,TGFBR2,MAPK10,GNAI3,TGFBR1,PIK3R1,IKBKB,TRAF6
hsa04340	Hedgehog signaling pathway	8	47	0.45	0.0406	9606.ENSP00000227507,9606.ENSP00000261254,9606.ENSP00000280098,9606.ENSP00000305777,9606.ENSP00000353904,9606.ENSP00000354621,9606.ENSP00000381185,9606.ENSP00000454926	CCND1,CCND2,SPOPL,CSNK1G1,CSNK1G3,SMURF1,BCL2,C16orf52
hsa04370	VEGF signaling pathway	9	57	0.42	0.0406	9606.ENSP00000215832,9606.ENSP00000229795,9606.ENSP00000256078,9606.ENSP00000263826,9606.ENSP00000263967,9606.ENSP00000358548,9606.ENSP00000383118,9606.ENSP00000428056,9606.ENSP00000478570	MAPK1,MAPK14,KRAS,AKT3,PIK3CA,NRAS,CDC42,PIK3R1,VEGFA
hsa05017	Spinocerebellar ataxia	16	135	0.3	0.0406	9606.ENSP00000219313,9606.ENSP00000225174,9606.ENSP00000237264,9606.ENSP00000244769,9606.ENSP00000247178,9606.ENSP00000261523,9606.ENSP00000263826,9606.ENSP00000263967,9606.ENSP00000288828,9606.ENSP00000329357,9606.ENSP00000352157,9606.ENSP00000368966,9606.ENSP00000378914,9606.ENSP00000415822,9606.ENSP00000428056,9606.ENSP00000440045	PSMD7,PPIF,TBPL1,ATXN1,ATG14,RORA,AKT3,PIK3CA,WIPI2,SP1,MAPK10,TRPC3,ULK2,ATXN1L,PIK3R1,ATP2A2
hsa04660	T cell receptor signaling pathway	13	101	0.33	0.0416	9606.ENSP00000215832,9606.ENSP00000216373,9606.ENSP00000229795,9606.ENSP00000256078,9606.ENSP00000263826,9606.ENSP00000263967,9606.ENSP00000278568,9606.ENSP00000352157,9606.ENSP00000358548,9606.ENSP00000383118,9606.ENSP00000387784,9606.ENSP00000428056,9606.ENSP00000430684	MAPK1,SOS2,MAPK14,KRAS,AKT3,PIK3CA,PAK1,MAPK10,NRAS,CDC42,SOS1,PIK3R1,IKBKB
hsa04666	Fc gamma R-mediated phagocytosis	12	90	0.35	0.042	9606.ENSP00000215832,9606.ENSP00000225577,9606.ENSP00000263826,9606.ENSP00000263967,9606.ENSP00000278568,9606.ENSP00000294742,9606.ENSP00000298159,9606.ENSP00000298316,9606.ENSP00000300574,9606.ENSP00000360296,9606.ENSP00000383118,9606.ENSP00000428056	MAPK1,RPS6KB1,AKT3,PIK3CA,PAK1,ARPC5,CFL2,ARF6,CRK,PPAP2B,CDC42,PIK3R1
hsa04625	C-type lectin receptor signaling pathway	13	102	0.33	0.0437	9606.ENSP00000164227,9606.ENSP00000215832,9606.ENSP00000229795,9606.ENSP00000245414,9606.ENSP00000246792,9606.ENSP00000256078,9606.ENSP00000263826,9606.ENSP00000263967,9606.ENSP00000278568,9606.ENSP00000352157,9606.ENSP00000358548,9606.ENSP00000428056,9606.ENSP00000430684	BCL3,MAPK1,MAPK14,IRF1,RRAS,KRAS,AKT3,PIK3CA,PAK1,MAPK10,NRAS,PIK3R1,IKBKB
hsa04062	Chemokine signaling pathway	20	186	0.25	0.0437	9606.ENSP00000215832,9606.ENSP00000216373,9606.ENSP00000232564,9606.ENSP00000246657,9606.ENSP00000250559,9606.ENSP00000256078,9606.ENSP00000261837,9606.ENSP00000263826,9606.ENSP00000263967,9606.ENSP00000264657,9606.ENSP00000278568,9606.ENSP00000286827,9606.ENSP00000294016,9606.ENSP00000300574,9606.ENSP00000358548,9606.ENSP00000358867,9606.ENSP00000383118,9606.ENSP00000387784,9606.ENSP00000428056,…	MAPK1,SOS2,GNB4,CCR7,RAP1B,KRAS,GNB5,AKT3,PIK3CA,STAT3,PAK1,TIAM1,ADCY9,CRK,NRAS,GNAI3,CDC42,SOS1,PIK3R1,IKBKB
hsa04215	Apoptosis - multiple species	6	30	0.52	0.0474	9606.ENSP00000302564,9606.ENSP00000352157,9606.ENSP00000360242,9606.ENSP00000376943,9606.ENSP00000381185,9606.ENSP00000404503	BCL2L1,MAPK10,XIAP,BCL2L11,BCL2,BBC3
hsa04710	Circadian rhythm	6	30	0.52	0.0474	9606.ENSP00000254657,9606.ENSP00000261523,9606.ENSP00000308741,9606.ENSP00000347834,9606.ENSP00000387699,9606.ENSP00000478187	PER2,RORA,CLOCK,FBXL3,CREB1,CRY2
hsa01524	Platinum drug resistance	10	70	0.38	0.0474	9606.ENSP00000215832,9606.ENSP00000263826,9606.ENSP00000263967,9606.ENSP00000302564,9606.ENSP00000345728,9606.ENSP00000360242,9606.ENSP00000381185,9606.ENSP00000384849,9606.ENSP00000404503,9606.ENSP00000428056	MAPK1,AKT3,PIK3CA,BCL2L1,ATP7A,XIAP,BCL2,CDKN1A,BBC3,PIK3R1
hsa05100	Bacterial invasion of epithelial cells	10	70	0.38	0.0474	9606.ENSP00000262995,9606.ENSP00000263967,9606.ENSP00000294742,9606.ENSP00000300574,9606.ENSP00000317272,9606.ENSP00000348828,9606.ENSP00000383118,9606.ENSP00000428056,9606.ENSP00000458162,9606.ENSP00000479861	GAB1,PIK3CA,ARPC5,CRK,MET,ARHGEF26,CDC42,PIK3R1,ACTG1,SEPT2
hsa04141	Protein processing in endoplasmic reticulum	18	165	0.26	0.05	9606.ENSP00000244763,9606.ENSP00000259253,9606.ENSP00000262213,9606.ENSP00000274140,9606.ENSP00000295770,9606.ENSP00000312107,9606.ENSP00000318147,9606.ENSP00000326813,9606.ENSP00000345575,9606.ENSP00000346130,9606.ENSP00000350708,9606.ENSP00000352157,9606.ENSP00000379042,9606.ENSP00000381185,9606.ENSP00000381823,9606.ENSP00000399457,9606.ENSP00000448665,9606.ENSP00000473631	SSR1,UGGT1,TRAM1,MARCH6,STT3B,UBXN2A,EDEM3,YOD1,DNAJB12,SVIP,RAD23B,MAPK10,ERO1L,BCL2,SEC24A,DDOST,DDIT3,DNAJC3

## Sheet: enrichment TISSUES shared UP
#term ID	term description	observed gene count	background gene count	strength	false discovery rate	matching proteins in your network (IDs)	matching proteins in your network (labels)
BTO:0000042	Animal	1112	14895	0.1	1.21e-61	9606.ENSP00000003302,9606.ENSP00000005178,9606.ENSP00000005257,9606.ENSP00000013070,9606.ENSP00000025301,9606.ENSP00000062104,9606.ENSP00000075120,9606.ENSP00000159111,9606.ENSP00000164024,9606.ENSP00000164227,9606.ENSP00000182527,9606.ENSP00000192788,9606.ENSP00000193322,9606.ENSP00000194530,9606.ENSP00000198767,9606.ENSP00000199320,9606.ENSP00000204726,9606.ENSP00000209728,9606.ENSP00000209875,…	USP28,PDK4,RALA,UBR7,AKAP11,NNAT,SLC2A3,KDM4B,CELSR3,BCL3,TRAM2,UHRF1BP1,OSTM1,STRADB,RRN3,DIMT1,GOLGA3,CDC6,CBX5,SIRT1,TGFBR3,CDC34,MAPK1,MORC2,TXN2,SOS2,SIX4,EIF5,AURKA,MMP2,PSMD7,NME4,AGO2,PAG1,MTMR9,PPP1R37,TBC1D17,USF2,CPA4,ITGB8,HBP1,STX1A,PPIF,DHX33,NUFIP2,RPS6KB1,CCDC47,AKAP10,DDX5,PHOX2B,CCND1,PRDM4,MLEC,CREBL2,CDKN1B,MAPK14,TMEM30A,PAPD7,NR3C1,TUSC2,GNB4,MAPRE3,C1orf21,CAMSAP2,TBPL1,MED…
BTO:0000000	Tissues, cell types and enzyme sources	1114	14943	0.09	1.21e-61	9606.ENSP00000003302,9606.ENSP00000005178,9606.ENSP00000005257,9606.ENSP00000013070,9606.ENSP00000025301,9606.ENSP00000062104,9606.ENSP00000075120,9606.ENSP00000159111,9606.ENSP00000164024,9606.ENSP00000164227,9606.ENSP00000182527,9606.ENSP00000192788,9606.ENSP00000193322,9606.ENSP00000194530,9606.ENSP00000198767,9606.ENSP00000199320,9606.ENSP00000204726,9606.ENSP00000209728,9606.ENSP00000209875,…	USP28,PDK4,RALA,UBR7,AKAP11,NNAT,SLC2A3,KDM4B,CELSR3,BCL3,TRAM2,UHRF1BP1,OSTM1,STRADB,RRN3,DIMT1,GOLGA3,CDC6,CBX5,SIRT1,TGFBR3,CDC34,MAPK1,MORC2,TXN2,SOS2,SIX4,EIF5,AURKA,MMP2,PSMD7,NME4,AGO2,PAG1,MTMR9,PPP1R37,TBC1D17,USF2,CPA4,ITGB8,HBP1,STX1A,PPIF,DHX33,NUFIP2,RPS6KB1,CCDC47,AKAP10,DDX5,PHOX2B,CCND1,PRDM4,MLEC,CREBL2,CDKN1B,MAPK14,TMEM30A,PAPD7,NR3C1,TUSC2,GNB4,MAPRE3,C1orf21,CAMSAP2,TBPL1,MED…
BTO:0000083	Female reproductive system	544	5799	0.19	6.77e-29	9606.ENSP00000005178,9606.ENSP00000013070,9606.ENSP00000062104,9606.ENSP00000075120,9606.ENSP00000159111,9606.ENSP00000182527,9606.ENSP00000193322,9606.ENSP00000194530,9606.ENSP00000198767,9606.ENSP00000204726,9606.ENSP00000209875,9606.ENSP00000212015,9606.ENSP00000212355,9606.ENSP00000215574,9606.ENSP00000215832,9606.ENSP00000215862,9606.ENSP00000216185,9606.ENSP00000216373,9606.ENSP00000216554,…	PDK4,UBR7,NNAT,SLC2A3,KDM4B,TRAM2,OSTM1,STRADB,RRN3,GOLGA3,CBX5,SIRT1,TGFBR3,CDC34,MAPK1,MORC2,TXN2,SOS2,EIF5,AURKA,MMP2,NME4,MTMR9,TBC1D17,ITGB8,HBP1,PPIF,DHX33,NUFIP2,RPS6KB1,CCDC47,DDX5,CCND1,MLEC,CDKN1B,MAPK14,TMEM30A,NR3C1,TUSC2,GNB4,CAMSAP2,TBPL1,PKD2,ELL2,ZFAND5,VPS4B,NAA50,ACVR2A,SNAI1,SOX4,SSR1,IRF1,RALY,PLAGL2,RRAS,SNAP23,EGLN3,RAP1B,MKNK2,ZFYVE26,ACTN4,SESN2,NDFIP1,NASP,MKRN1,KRAS,MBD2…
BTO:0001489	Whole body	938	12619	0.09	5.44e-27	9606.ENSP00000003302,9606.ENSP00000005178,9606.ENSP00000005257,9606.ENSP00000013070,9606.ENSP00000025301,9606.ENSP00000062104,9606.ENSP00000075120,9606.ENSP00000159111,9606.ENSP00000164024,9606.ENSP00000182527,9606.ENSP00000193322,9606.ENSP00000194530,9606.ENSP00000198767,9606.ENSP00000199320,9606.ENSP00000204726,9606.ENSP00000209875,9606.ENSP00000212015,9606.ENSP00000212355,9606.ENSP00000215574,…	USP28,PDK4,RALA,UBR7,AKAP11,NNAT,SLC2A3,KDM4B,CELSR3,TRAM2,OSTM1,STRADB,RRN3,DIMT1,GOLGA3,CBX5,SIRT1,TGFBR3,CDC34,MAPK1,MORC2,TXN2,SOS2,SIX4,EIF5,AURKA,MMP2,PSMD7,NME4,AGO2,PAG1,MTMR9,PPP1R37,TBC1D17,USF2,CPA4,ITGB8,HBP1,STX1A,PPIF,DHX33,NUFIP2,RPS6KB1,CCDC47,AKAP10,DDX5,PHOX2B,CCND1,MLEC,CREBL2,CDKN1B,MAPK14,TMEM30A,PAPD7,NR3C1,TUSC2,GNB4,MAPRE3,CAMSAP2,TBPL1,PKD2,ELL2,ZFAND5,FKBP15,VPS4B,YIPF4,…
BTO:0000142	Brain	510	5462	0.19	7.7e-26	9606.ENSP00000025301,9606.ENSP00000062104,9606.ENSP00000075120,9606.ENSP00000159111,9606.ENSP00000164024,9606.ENSP00000198767,9606.ENSP00000209875,9606.ENSP00000215574,9606.ENSP00000215832,9606.ENSP00000216554,9606.ENSP00000219070,9606.ENSP00000220597,9606.ENSP00000221086,9606.ENSP00000221543,9606.ENSP00000222305,9606.ENSP00000222573,9606.ENSP00000222574,9606.ENSP00000222812,9606.ENSP00000225174,…	AKAP11,NNAT,SLC2A3,KDM4B,CELSR3,RRN3,CBX5,CDC34,MAPK1,EIF5,MMP2,PAG1,MTMR9,TBC1D17,USF2,ITGB8,HBP1,STX1A,PPIF,NUFIP2,AKAP10,DDX5,CCND1,CREBL2,CDKN1B,TMEM30A,PAPD7,TUSC2,GNB4,MAPRE3,CAMSAP2,ZFAND5,FKBP15,NAA50,ACVR2A,RAB9B,ATXN1,RAP2A,EFNB2,RALY,ATG14,RAP1B,MKNK2,SESN2,NDFIP1,PER2,NASP,MKRN1,KRAS,PDGFRA,DYNC1LI2,STX6,CAB39,KAT7,DAB2IP,ENPP2,RNF38,ARL3,OSBPL8,SYT1,CCND2,TBC1D1,MSMO1,MIB1,ARL1,SLC6A…
BTO:0000081	Reproductive system	550	6107	0.18	4.04e-25	9606.ENSP00000005178,9606.ENSP00000013070,9606.ENSP00000062104,9606.ENSP00000075120,9606.ENSP00000159111,9606.ENSP00000182527,9606.ENSP00000193322,9606.ENSP00000194530,9606.ENSP00000198767,9606.ENSP00000204726,9606.ENSP00000209875,9606.ENSP00000212015,9606.ENSP00000212355,9606.ENSP00000215574,9606.ENSP00000215832,9606.ENSP00000215862,9606.ENSP00000216185,9606.ENSP00000216373,9606.ENSP00000216554,…	PDK4,UBR7,NNAT,SLC2A3,KDM4B,TRAM2,OSTM1,STRADB,RRN3,GOLGA3,CBX5,SIRT1,TGFBR3,CDC34,MAPK1,MORC2,TXN2,SOS2,EIF5,AURKA,MMP2,NME4,MTMR9,TBC1D17,ITGB8,HBP1,PPIF,DHX33,NUFIP2,RPS6KB1,CCDC47,DDX5,CCND1,MLEC,CDKN1B,MAPK14,TMEM30A,NR3C1,TUSC2,GNB4,CAMSAP2,TBPL1,PKD2,ELL2,ZFAND5,VPS4B,NAA50,ACVR2A,SNAI1,SOX4,SSR1,IRF1,RALY,PLAGL2,RRAS,SNAP23,EGLN3,RAP1B,MKNK2,ZFYVE26,ACTN4,SESN2,NDFIP1,NASP,MKRN1,KRAS,MBD2…
BTO:0000227	Central nervous system	513	5558	0.19	5.02e-25	9606.ENSP00000025301,9606.ENSP00000062104,9606.ENSP00000075120,9606.ENSP00000159111,9606.ENSP00000164024,9606.ENSP00000198767,9606.ENSP00000209875,9606.ENSP00000215574,9606.ENSP00000215832,9606.ENSP00000216554,9606.ENSP00000219070,9606.ENSP00000220592,9606.ENSP00000220597,9606.ENSP00000221086,9606.ENSP00000221543,9606.ENSP00000222305,9606.ENSP00000222573,9606.ENSP00000222574,9606.ENSP00000222812,…	AKAP11,NNAT,SLC2A3,KDM4B,CELSR3,RRN3,CBX5,CDC34,MAPK1,EIF5,MMP2,AGO2,PAG1,MTMR9,TBC1D17,USF2,ITGB8,HBP1,STX1A,PPIF,NUFIP2,AKAP10,DDX5,CCND1,CREBL2,CDKN1B,TMEM30A,PAPD7,TUSC2,GNB4,MAPRE3,CAMSAP2,ZFAND5,FKBP15,NAA50,ACVR2A,RAB9B,ATXN1,RAP2A,EFNB2,RALY,ATG14,RAP1B,MKNK2,SESN2,NDFIP1,PER2,NASP,MKRN1,KRAS,PDGFRA,DYNC1LI2,STX6,CAB39,KAT7,DAB2IP,ENPP2,RNF38,ARL3,OSBPL8,SYT1,CCND2,TBC1D1,MSMO1,MIB1,ARL1,…
BTO:0001484	Nervous system	522	5707	0.18	8.03e-25	9606.ENSP00000005178,9606.ENSP00000025301,9606.ENSP00000062104,9606.ENSP00000075120,9606.ENSP00000159111,9606.ENSP00000164024,9606.ENSP00000198767,9606.ENSP00000209875,9606.ENSP00000215574,9606.ENSP00000215832,9606.ENSP00000216554,9606.ENSP00000219070,9606.ENSP00000220592,9606.ENSP00000220597,9606.ENSP00000221086,9606.ENSP00000221543,9606.ENSP00000222305,9606.ENSP00000222573,9606.ENSP00000222574,…	PDK4,AKAP11,NNAT,SLC2A3,KDM4B,CELSR3,RRN3,CBX5,CDC34,MAPK1,EIF5,MMP2,AGO2,PAG1,MTMR9,TBC1D17,USF2,ITGB8,HBP1,STX1A,PPIF,NUFIP2,AKAP10,DDX5,PHOX2B,CCND1,CREBL2,CDKN1B,TMEM30A,PAPD7,TUSC2,GNB4,MAPRE3,CAMSAP2,ZFAND5,FKBP15,NAA50,ACVR2A,RAB9B,ATXN1,RAP2A,EFNB2,RALY,ATG14,RAP1B,MKNK2,SESN2,NDFIP1,PER2,NASP,MKRN1,KRAS,PDGFRA,DYNC1LI2,STX6,CAB39,KAT7,DAB2IP,ENPP2,RNF38,ARL3,OSBPL8,SYT1,CCND2,TBC1D1,MSMO…
BTO:0003091	Urogenital system	582	6716	0.16	2.65e-23	9606.ENSP00000005178,9606.ENSP00000013070,9606.ENSP00000062104,9606.ENSP00000075120,9606.ENSP00000159111,9606.ENSP00000182527,9606.ENSP00000193322,9606.ENSP00000194530,9606.ENSP00000198767,9606.ENSP00000204726,9606.ENSP00000209875,9606.ENSP00000212015,9606.ENSP00000212355,9606.ENSP00000215574,9606.ENSP00000215832,9606.ENSP00000215862,9606.ENSP00000216185,9606.ENSP00000216373,9606.ENSP00000216554,…	PDK4,UBR7,NNAT,SLC2A3,KDM4B,TRAM2,OSTM1,STRADB,RRN3,GOLGA3,CBX5,SIRT1,TGFBR3,CDC34,MAPK1,MORC2,TXN2,SOS2,EIF5,AURKA,MMP2,NME4,MTMR9,TBC1D17,ITGB8,HBP1,PPIF,DHX33,NUFIP2,RPS6KB1,CCDC47,DDX5,CCND1,MLEC,CDKN1B,MAPK14,TMEM30A,NR3C1,TUSC2,GNB4,MAPRE3,CAMSAP2,TBPL1,PKD2,ELL2,ZFAND5,VPS4B,NFYB,NAA50,ACVR2A,SNAI1,SOX4,SSR1,IRF1,RALY,PLAGL2,RRAS,SNAP23,EGLN3,RAP1B,MKNK2,ZFYVE26,ACTN4,SESN2,NDFIP1,NASP,MKR…
BTO:0000282	Head	553	6329	0.16	2.64e-22	9606.ENSP00000005257,9606.ENSP00000025301,9606.ENSP00000062104,9606.ENSP00000075120,9606.ENSP00000159111,9606.ENSP00000164024,9606.ENSP00000198767,9606.ENSP00000209875,9606.ENSP00000212355,9606.ENSP00000215574,9606.ENSP00000215832,9606.ENSP00000216185,9606.ENSP00000216554,9606.ENSP00000219070,9606.ENSP00000220592,9606.ENSP00000220597,9606.ENSP00000221086,9606.ENSP00000221543,9606.ENSP00000222305,…	RALA,AKAP11,NNAT,SLC2A3,KDM4B,CELSR3,RRN3,CBX5,TGFBR3,CDC34,MAPK1,TXN2,EIF5,MMP2,AGO2,PAG1,MTMR9,TBC1D17,USF2,ITGB8,HBP1,STX1A,PPIF,NUFIP2,RPS6KB1,AKAP10,DDX5,CCND1,CREBL2,CDKN1B,TMEM30A,PAPD7,TUSC2,GNB4,MAPRE3,CAMSAP2,ZFAND5,FKBP15,NAA50,ACVR2A,RAB9B,ATXN1,RAP2A,EFNB2,RALY,CCR7,ATG14,RAP1B,MKNK2,SESN2,NDFIP1,PER2,NASP,MKRN1,KRAS,PDGFRA,DYNC1LI2,STX6,CAB39,KAT7,DAB2IP,ENPP2,RNF38,ARL3,OSBPL8,SYT1…
BTO:0000284	Organism form	238	2239	0.25	4.6e-15	9606.ENSP00000003302,9606.ENSP00000062104,9606.ENSP00000182527,9606.ENSP00000209875,9606.ENSP00000212355,9606.ENSP00000215574,9606.ENSP00000216185,9606.ENSP00000216373,9606.ENSP00000216513,9606.ENSP00000219313,9606.ENSP00000225388,9606.ENSP00000225577,9606.ENSP00000225726,9606.ENSP00000225792,9606.ENSP00000227507,9606.ENSP00000228872,9606.ENSP00000229795,9606.ENSP00000231509,9606.ENSP00000232496,…	USP28,NNAT,TRAM2,CBX5,TGFBR3,CDC34,TXN2,SOS2,SIX4,PSMD7,NUFIP2,RPS6KB1,CCDC47,DDX5,CCND1,CDKN1B,MAPK14,NR3C1,TUSC2,PKD2,VPS4B,SNAI1,SSR1,IRF1,RALY,CCR7,PIN1,SNAP23,RAP1B,ACTN4,NDFIP1,NASP,PDGFRA,DYNC1LI2,ABHD17C,KAT7,THBS1,ADAM10,CCND2,RAB21,TBC1D1,RORA,ARL1,SLC6A4,MEOX2,MTUS1,RBL2,SMAD2,SPTLC1,CCNE1,LIFR,ARID3A,ACVR1,AKT3,CPOX,FGF2,STAT3,XRN1,VCAN,AFF4,EXPH5,IGF1R,GATA6,ARHGDIA,TEX261,RASA1,CDK1…
BTO:0000174	Embryonic structure	228	2132	0.25	1.28e-14	9606.ENSP00000003302,9606.ENSP00000062104,9606.ENSP00000182527,9606.ENSP00000209875,9606.ENSP00000212355,9606.ENSP00000215574,9606.ENSP00000216185,9606.ENSP00000216373,9606.ENSP00000216513,9606.ENSP00000219313,9606.ENSP00000225388,9606.ENSP00000225577,9606.ENSP00000225726,9606.ENSP00000225792,9606.ENSP00000227507,9606.ENSP00000228872,9606.ENSP00000229795,9606.ENSP00000231509,9606.ENSP00000238497,…	USP28,NNAT,TRAM2,CBX5,TGFBR3,CDC34,TXN2,SOS2,SIX4,PSMD7,NUFIP2,RPS6KB1,CCDC47,DDX5,CCND1,CDKN1B,MAPK14,NR3C1,VPS4B,SNAI1,SSR1,IRF1,RALY,PIN1,SNAP23,RAP1B,ACTN4,NDFIP1,NASP,PDGFRA,DYNC1LI2,ABHD17C,KAT7,THBS1,ADAM10,CCND2,RAB21,TBC1D1,RORA,ARL1,SLC6A4,MEOX2,MTUS1,RBL2,SMAD2,SPTLC1,CCNE1,LIFR,ARID3A,ACVR1,AKT3,CPOX,FGF2,STAT3,XRN1,VCAN,AFF4,EXPH5,IGF1R,GATA6,ARHGDIA,TEX261,RASA1,CDK16,DSC2,MYCN,FBXW…
BTO:0000180	Cervical carcinoma cell	54	271	0.52	1.26e-10	9606.ENSP00000212015,9606.ENSP00000215832,9606.ENSP00000216911,9606.ENSP00000220592,9606.ENSP00000225577,9606.ENSP00000228872,9606.ENSP00000229795,9606.ENSP00000256078,9606.ENSP00000262160,9606.ENSP00000262238,9606.ENSP00000262643,9606.ENSP00000264657,9606.ENSP00000264709,9606.ENSP00000268035,9606.ENSP00000287820,9606.ENSP00000303706,9606.ENSP00000310170,9606.ENSP00000317272,9606.ENSP00000317872,…	SIRT1,MAPK1,AURKA,AGO2,RPS6KB1,CDKN1B,MAPK14,KRAS,SMAD2,YY1,CCNE1,STAT3,DNMT3A,IGF1R,PPARG,CDC25A,FOSL1,MET,RBBP6,E2F7,DNMT3B,SP1,MTDH,HNRNPA1,MAP2K3,E2F1,TGFBR2,DNMT1,RRM2,ZEB1,TOP1,E2F2,MCL1,XIAP,KLF4,FOXO1,CUL5,TMCC1,BCL2L11,AKTIP,RUNX3,CDKN1A,XPO1,CREB1,AMOTL1,CHEK1,WEE1,STMN1,CCNE2,IKBKB,H2AFX,DICER1,CUL2,YAP1
BTO:0001488	Endocrine gland	479	6036	0.12	2.04e-10	9606.ENSP00000013070,9606.ENSP00000075120,9606.ENSP00000159111,9606.ENSP00000198767,9606.ENSP00000209875,9606.ENSP00000212015,9606.ENSP00000215832,9606.ENSP00000215862,9606.ENSP00000216185,9606.ENSP00000216554,9606.ENSP00000216911,9606.ENSP00000219070,9606.ENSP00000219313,9606.ENSP00000221086,9606.ENSP00000222305,9606.ENSP00000222574,9606.ENSP00000225174,9606.ENSP00000225726,9606.ENSP00000225792,…	UBR7,SLC2A3,KDM4B,RRN3,CBX5,SIRT1,MAPK1,MORC2,TXN2,EIF5,AURKA,MMP2,PSMD7,MTMR9,USF2,HBP1,PPIF,CCDC47,DDX5,CCND1,MLEC,MAPK14,TMEM30A,NR3C1,TUSC2,TBPL1,PKD2,ZFAND5,VPS4B,ACVR2A,SNAI1,SOX4,SSR1,RAP2A,IRF1,RALY,PLAGL2,RRAS,SNAP23,RAP1B,MKNK2,SALL1,ACTN4,SESN2,NDFIP1,PER2,NASP,MKRN1,KRAS,VHL,GNS,DYNC1LI2,LAMC1,CAB39,IGF2BP3,KAT7,UGGT1,ENPP2,RNF38,THBS1,ADAM10,ITGAV,OSBPL8,TBC1D1,MSMO1,CLCN3,RORA,RNF13…
BTO:0000522	Gland	513	6602	0.11	4.49e-10	9606.ENSP00000013070,9606.ENSP00000075120,9606.ENSP00000159111,9606.ENSP00000198767,9606.ENSP00000204726,9606.ENSP00000209875,9606.ENSP00000212015,9606.ENSP00000215832,9606.ENSP00000215862,9606.ENSP00000216185,9606.ENSP00000216554,9606.ENSP00000216911,9606.ENSP00000219070,9606.ENSP00000219313,9606.ENSP00000221086,9606.ENSP00000222305,9606.ENSP00000222482,9606.ENSP00000222574,9606.ENSP00000225174,…	UBR7,SLC2A3,KDM4B,RRN3,GOLGA3,CBX5,SIRT1,MAPK1,MORC2,TXN2,EIF5,AURKA,MMP2,PSMD7,MTMR9,USF2,CPA4,HBP1,PPIF,CCDC47,DDX5,CCND1,MLEC,CDKN1B,MAPK14,TMEM30A,NR3C1,TUSC2,MAPRE3,TBPL1,PKD2,ZFAND5,VPS4B,ACVR2A,SNAI1,SOX4,SSR1,RAP2A,IRF1,RALY,PLAGL2,RRAS,SNAP23,RAP1B,MKNK2,SALL1,ACTN4,SESN2,NDFIP1,PER2,NASP,MKRN1,KRAS,VHL,GNS,DYNC1LI2,LAMC1,CAB39,IGF2BP3,KAT7,UGGT1,ENPP2,RNF38,THBS1,ADAM10,ITGAV,OSBPL8,TBC…
BTO:0003099	Internal female genital organ	239	2593	0.19	4.78e-09	9606.ENSP00000005178,9606.ENSP00000062104,9606.ENSP00000075120,9606.ENSP00000182527,9606.ENSP00000198767,9606.ENSP00000209875,9606.ENSP00000212355,9606.ENSP00000216185,9606.ENSP00000216554,9606.ENSP00000216911,9606.ENSP00000222574,9606.ENSP00000225174,9606.ENSP00000225388,9606.ENSP00000225577,9606.ENSP00000225726,9606.ENSP00000225792,9606.ENSP00000227507,9606.ENSP00000228872,9606.ENSP00000229795,…	PDK4,NNAT,SLC2A3,TRAM2,RRN3,CBX5,TGFBR3,TXN2,EIF5,AURKA,HBP1,PPIF,NUFIP2,RPS6KB1,CCDC47,DDX5,CCND1,CDKN1B,MAPK14,NR3C1,SOX4,SSR1,IRF1,RRAS,SNAP23,EGLN3,RAP1B,MKNK2,ZFYVE26,ACTN4,NASP,VHL,PDGFRA,DYNC1LI2,THBS1,ADAM10,OSBPL8,CCND2,RAB21,RORA,ARL1,SLC6A4,NAA25,AP4E1,MTUS1,RBL2,SMAD2,SPTLC1,CCNE1,CCDC6,UBE2R2,LIFR,ARID3A,ACVR1,FGF2,STAT3,RAB10,GALNT7,VCAN,AFF4,EXPH5,IGF1R,ARHGDIA,TEX261,RASA1,PAK1,DS…
BTO:0000449	Fetus	132	1229	0.25	5.89e-08	9606.ENSP00000062104,9606.ENSP00000182527,9606.ENSP00000209875,9606.ENSP00000212355,9606.ENSP00000225577,9606.ENSP00000225726,9606.ENSP00000225792,9606.ENSP00000227507,9606.ENSP00000229795,9606.ENSP00000231509,9606.ENSP00000244763,9606.ENSP00000245414,9606.ENSP00000249647,9606.ENSP00000250559,9606.ENSP00000252699,9606.ENSP00000255120,9606.ENSP00000257290,9606.ENSP00000258198,9606.ENSP00000260356,…	NNAT,TRAM2,CBX5,TGFBR3,RPS6KB1,CCDC47,DDX5,CCND1,MAPK14,NR3C1,SSR1,IRF1,SNAP23,RAP1B,ACTN4,NASP,PDGFRA,DYNC1LI2,THBS1,ADAM10,CCND2,RORA,ARL1,SLC6A4,MTUS1,RBL2,SMAD2,SPTLC1,CCNE1,LIFR,ARID3A,FGF2,STAT3,VCAN,EXPH5,IGF1R,TEX261,RASA1,DSC2,SMARCA5,KLF10,CSF1R,PPARG,KIT,WIPI2,STT3B,CRK,THOP1,ARL6IP1,KIF5B,CLOCK,CHST1,RPL15,SLC5A6,CAPN6,CREB3L2,KDELR1,BRWD1,FNDC3B,ACSL4,SERINC3,SMAD4,HNRNPA1,INSIG1,PDE…
BTO:0001078	Placenta	126	1176	0.25	1.65e-07	9606.ENSP00000062104,9606.ENSP00000182527,9606.ENSP00000212355,9606.ENSP00000225577,9606.ENSP00000225726,9606.ENSP00000225792,9606.ENSP00000227507,9606.ENSP00000229795,9606.ENSP00000231509,9606.ENSP00000244763,9606.ENSP00000245414,9606.ENSP00000249647,9606.ENSP00000250559,9606.ENSP00000252699,9606.ENSP00000255120,9606.ENSP00000257290,9606.ENSP00000258198,9606.ENSP00000260356,9606.ENSP00000260408,…	NNAT,TRAM2,TGFBR3,RPS6KB1,CCDC47,DDX5,CCND1,MAPK14,NR3C1,SSR1,IRF1,SNAP23,RAP1B,ACTN4,NASP,PDGFRA,DYNC1LI2,THBS1,ADAM10,CCND2,RORA,ARL1,SLC6A4,MTUS1,RBL2,SMAD2,SPTLC1,CCNE1,LIFR,ARID3A,FGF2,STAT3,VCAN,EXPH5,IGF1R,TEX261,RASA1,DSC2,SMARCA5,KLF10,CSF1R,PPARG,KIT,WIPI2,STT3B,THOP1,ARL6IP1,KIF5B,CLOCK,CHST1,RPL15,SLC5A6,CAPN6,CREB3L2,KDELR1,BRWD1,FNDC3B,ACSL4,SERINC3,SMAD4,HNRNPA1,INSIG1,PDE4D,MYLIP,…
BTO:0000580	Blood cancer cell	115	1098	0.24	2.69e-06	9606.ENSP00000209875,9606.ENSP00000212015,9606.ENSP00000215832,9606.ENSP00000220592,9606.ENSP00000225577,9606.ENSP00000225792,9606.ENSP00000228506,9606.ENSP00000229795,9606.ENSP00000231509,9606.ENSP00000233121,9606.ENSP00000250896,9606.ENSP00000252674,9606.ENSP00000255120,9606.ENSP00000260408,9606.ENSP00000261023,9606.ENSP00000261254,9606.ENSP00000261263,9606.ENSP00000261900,9606.ENSP00000262133,…	CBX5,SIRT1,MAPK1,AGO2,RPS6KB1,DDX5,MLEC,MAPK14,NR3C1,MAPRE3,MKNK2,MLLT1,NASP,ADAM10,ITGAV,CCND2,RAB21,CCNT1,RBL2,SMAD2,YY1,RCOR1,CPOX,STAT3,DNMT3A,LEF1,CDK6,POGZ,ZFP36L2,TIAM1,HMGCR,CDC25A,DDIT4,ZBTB5,RPL15,SUZ12,ARID1A,HMGCS1,SMC1A,LASP1,DNMT3B,PHF6,SP1,SOCS1,PHF12,LBR,HNRNPA1,FOXN3,LIN28B,E2F1,ATP7A,UBE2I,IGF2R,BCL11B,NF1,MAX,DNMT1,RRM2,ZEB1,TOP1,POU2F1,MCL1,NRAS,SCD,NFIA,PTPN1,NCOA3,OGT,SF1,RP…
BTO:0001271	Leukemia cell	103	949	0.26	2.89e-06	9606.ENSP00000209875,9606.ENSP00000212015,9606.ENSP00000215832,9606.ENSP00000220592,9606.ENSP00000225577,9606.ENSP00000225792,9606.ENSP00000229795,9606.ENSP00000231509,9606.ENSP00000250896,9606.ENSP00000252674,9606.ENSP00000255120,9606.ENSP00000260408,9606.ENSP00000261023,9606.ENSP00000261254,9606.ENSP00000262133,9606.ENSP00000262160,9606.ENSP00000262238,9606.ENSP00000262241,9606.ENSP00000264193,…	CBX5,SIRT1,MAPK1,AGO2,RPS6KB1,DDX5,MAPK14,NR3C1,MKNK2,MLLT1,NASP,ADAM10,ITGAV,CCND2,RBL2,SMAD2,YY1,RCOR1,CPOX,STAT3,DNMT3A,LEF1,CDK6,POGZ,ZFP36L2,TIAM1,HMGCR,CDC25A,DDIT4,ZBTB5,RPL15,SUZ12,ARID1A,HMGCS1,SMC1A,LASP1,DNMT3B,PHF6,SP1,SOCS1,PHF12,LBR,HNRNPA1,FOXN3,LIN28B,E2F1,ATP7A,UBE2I,IGF2R,BCL11B,NF1,MAX,DNMT1,RRM2,ZEB1,TOP1,MCL1,NRAS,SCD,NFIA,PTPN1,NCOA3,OGT,SF1,RPS6KA3,PIGA,SBF1,SRSF2,ETS1,BCL2…
BTO:0000080	Male reproductive gland	215	2505	0.16	1.07e-05	9606.ENSP00000013070,9606.ENSP00000075120,9606.ENSP00000159111,9606.ENSP00000212015,9606.ENSP00000215862,9606.ENSP00000216554,9606.ENSP00000219070,9606.ENSP00000221086,9606.ENSP00000222574,9606.ENSP00000225792,9606.ENSP00000230461,9606.ENSP00000237264,9606.ENSP00000238497,9606.ENSP00000244050,9606.ENSP00000246194,9606.ENSP00000246229,9606.ENSP00000249647,9606.ENSP00000250559,9606.ENSP00000252699,…	UBR7,SLC2A3,KDM4B,SIRT1,MORC2,EIF5,MMP2,MTMR9,HBP1,DDX5,TMEM30A,TBPL1,VPS4B,SNAI1,RALY,PLAGL2,SNAP23,RAP1B,ACTN4,NDFIP1,NASP,MKRN1,KRAS,GNS,DYNC1LI2,CAB39,KAT7,RNF38,THBS1,ITGAV,MSMO1,CLCN3,RORA,RNF138,ARL1,MTUS1,RBL2,UBE2R2,ZNF106,AKT3,ARID4B,DNMT3A,RAB10,GALNT7,LEF1,PRKAR2A,ANLN,ABHD2,ZCCHC14,SIK1,POGZ,RASA1,FEM1C,CDK16,MBNL1,SMARCA5,APP,CLDN12,IPPK,PDPR,WIPI2,PDXK,SLC25A32,TSC1,CPSF2,USP32,THO…
BTO:0000254	Female reproductive gland	233	2783	0.15	1.69e-05	9606.ENSP00000013070,9606.ENSP00000075120,9606.ENSP00000159111,9606.ENSP00000212015,9606.ENSP00000215862,9606.ENSP00000216554,9606.ENSP00000216911,9606.ENSP00000219070,9606.ENSP00000221086,9606.ENSP00000222574,9606.ENSP00000225174,9606.ENSP00000225726,9606.ENSP00000225792,9606.ENSP00000230461,9606.ENSP00000237264,9606.ENSP00000237596,9606.ENSP00000238497,9606.ENSP00000241416,9606.ENSP00000244050,…	UBR7,SLC2A3,KDM4B,SIRT1,MORC2,EIF5,AURKA,MMP2,MTMR9,HBP1,PPIF,CCDC47,DDX5,TMEM30A,TBPL1,PKD2,VPS4B,ACVR2A,SNAI1,SOX4,RALY,PLAGL2,SNAP23,RAP1B,NDFIP1,NASP,MKRN1,KRAS,VHL,GNS,DYNC1LI2,CAB39,KAT7,RNF38,THBS1,ITGAV,MSMO1,CLCN3,RORA,RNF138,ARL1,MTUS1,RBL2,UBE2R2,ZNF106,AKT3,ARID4B,CPOX,STAT3,DNMT3A,GALNT7,LEF1,PRKAR2A,ANLN,ABHD2,ZCCHC14,SIK1,MEF2D,POGZ,RASA1,FEM1C,CDK16,SMARCA5,APP,CLDN12,PDPR,WIPI2,P…
BTO:0000534	Gonad	163	1792	0.18	1.75e-05	9606.ENSP00000013070,9606.ENSP00000075120,9606.ENSP00000159111,9606.ENSP00000212015,9606.ENSP00000215862,9606.ENSP00000216554,9606.ENSP00000219070,9606.ENSP00000222574,9606.ENSP00000225792,9606.ENSP00000230461,9606.ENSP00000237264,9606.ENSP00000246194,9606.ENSP00000250559,9606.ENSP00000255120,9606.ENSP00000255977,9606.ENSP00000256078,9606.ENSP00000258145,9606.ENSP00000258198,9606.ENSP00000258418,…	UBR7,SLC2A3,KDM4B,SIRT1,MORC2,EIF5,MMP2,HBP1,DDX5,TMEM30A,TBPL1,RALY,RAP1B,NASP,MKRN1,KRAS,GNS,DYNC1LI2,CAB39,KAT7,RNF38,ITGAV,MSMO1,CLCN3,RORA,RNF138,ARL1,RBL2,UBE2R2,ZNF106,AKT3,ARID4B,DNMT3A,LEF1,PRKAR2A,ANLN,ABHD2,ZCCHC14,FEM1C,CDK16,SMARCA5,APP,CLDN12,PDPR,WIPI2,PDXK,CPSF2,USP32,THOP1,ARL6IP1,RPL15,DPYSL2,REST,SLCO3A1,GLYR1,MBOAT1,DDHD1,MIEF1,PPM1A,FBXO21,DNMT3B,SP1,EMC10,KPNA4,CMTR2,MTDH,LR…
BTO:0000082	Male reproductive system	225	2671	0.15	1.75e-05	9606.ENSP00000013070,9606.ENSP00000075120,9606.ENSP00000159111,9606.ENSP00000212015,9606.ENSP00000215862,9606.ENSP00000216554,9606.ENSP00000219070,9606.ENSP00000221086,9606.ENSP00000222574,9606.ENSP00000225792,9606.ENSP00000230461,9606.ENSP00000237264,9606.ENSP00000238497,9606.ENSP00000240922,9606.ENSP00000244050,9606.ENSP00000246194,9606.ENSP00000246229,9606.ENSP00000249647,9606.ENSP00000250559,…	UBR7,SLC2A3,KDM4B,SIRT1,MORC2,EIF5,MMP2,MTMR9,HBP1,DDX5,TMEM30A,TBPL1,VPS4B,NAA50,SNAI1,RALY,PLAGL2,SNAP23,RAP1B,ACTN4,NDFIP1,NASP,MKRN1,KRAS,PDGFRA,GNS,DYNC1LI2,CAB39,KAT7,RNF38,THBS1,ITGAV,MSMO1,CLCN3,RORA,RNF138,ARL1,MTUS1,RBL2,YY1,UBE2R2,ZNF106,AKT3,ARID4B,CPOX,DNMT3A,RAB10,DNAJC27,GALNT7,LEF1,PRKAR2A,ANLN,ABHD2,ZCCHC14,SIK1,POGZ,RASA1,FEM1C,CDK16,MBNL1,SMARCA5,APP,CLDN12,IPPK,PDPR,WIPI2,PDXK…
BTO:0000744	Lymphocytic leukemia cell	50	361	0.36	2.14e-05	9606.ENSP00000212015,9606.ENSP00000215832,9606.ENSP00000225577,9606.ENSP00000229795,9606.ENSP00000231509,9606.ENSP00000260408,9606.ENSP00000261023,9606.ENSP00000262133,9606.ENSP00000262238,9606.ENSP00000265165,9606.ENSP00000265734,9606.ENSP00000286827,9606.ENSP00000307604,9606.ENSP00000316578,9606.ENSP00000320485,9606.ENSP00000329097,9606.ENSP00000341826,9606.ENSP00000343288,9606.ENSP00000345571,…	SIRT1,MAPK1,RPS6KB1,MAPK14,NR3C1,ADAM10,ITGAV,RBL2,YY1,LEF1,CDK6,TIAM1,ZBTB5,SUZ12,ARID1A,PHF6,HNRNPA1,FOXN3,E2F1,ATP7A,IGF2R,BCL11B,NF1,DNMT1,RRM2,ZEB1,NCOA3,RPS6KA3,SBF1,SRSF2,ETS1,BCL2L11,AFF1,YWHAZ,NCOR2,NLK,CREB1,SOS1,CHEK1,MECP2,NFIC,WEE1,STMN1,PHC3,PIK3R1,CCNE2,IKBKB,KMT2A,TET2,YAP1
BTO:0000583	Bone marrow cancer cell	53	395	0.35	2.23e-05	9606.ENSP00000212015,9606.ENSP00000215832,9606.ENSP00000220592,9606.ENSP00000225577,9606.ENSP00000225792,9606.ENSP00000229795,9606.ENSP00000231509,9606.ENSP00000252674,9606.ENSP00000261254,9606.ENSP00000262065,9606.ENSP00000262160,9606.ENSP00000262238,9606.ENSP00000262241,9606.ENSP00000264193,9606.ENSP00000264657,9606.ENSP00000264709,9606.ENSP00000303706,9606.ENSP00000307305,9606.ENSP00000316578,…	SIRT1,MAPK1,AGO2,RPS6KB1,DDX5,MAPK14,NR3C1,MLLT1,CCND2,MMD,SMAD2,YY1,RCOR1,CPOX,STAT3,DNMT3A,CDC25A,DDIT4,SUZ12,DNMT3B,SP1,PHF12,HNRNPA1,IFNAR2,ATP7A,NF1,DNMT1,TOP1,SUCO,MCL1,NFIA,PTPN1,PIGA,SRSF2,ETS1,BCL2L11,AFF1,YWHAZ,XPO1,AGFG1,CREB1,CHEK1,WEE1,BBC3,STMN1,IKBKB,USP47,KMT2A,DICER1,TET2,ITGB3,NFAT5,NR2C2
BTO:0000379	Embryo	78	708	0.26	6.44e-05	9606.ENSP00000003302,9606.ENSP00000216513,9606.ENSP00000219313,9606.ENSP00000228872,9606.ENSP00000229795,9606.ENSP00000238497,9606.ENSP00000244050,9606.ENSP00000246194,9606.ENSP00000247970,9606.ENSP00000253814,9606.ENSP00000255120,9606.ENSP00000258884,9606.ENSP00000259021,9606.ENSP00000262041,9606.ENSP00000263826,9606.ENSP00000264193,9606.ENSP00000264951,9606.ENSP00000265343,9606.ENSP00000281043,…	USP28,SIX4,PSMD7,CDKN1B,MAPK14,VPS4B,SNAI1,RALY,PIN1,NDFIP1,NASP,ABHD17C,KAT7,MEOX2,AKT3,CPOX,XRN1,AFF4,MYCN,FBXW7,SMARCA5,APPL1,MITF,FYCO1,TSC1,UBE3C,RSF1,CLSPN,ARID1A,SOX11,SMC1A,TRIM2,PSPC1,SH3PXD2A,RAD23B,RAB3GAP2,SMARCAD1,CSNK1G3,FUT8,ZEB1,QKI,CNOT7,ENAH,PNISR,MBNL3,RUNX2,PBX2,TRPC3,NIN,PAX3,BCL2L11,TRPS1,ZMYND11,CDC42,SLC8A1,SUN2,ARHGAP35,ATG9A,CREB1,CHEK1,PPP6C,FGFR1,SESN1,HMGA1,TBL1XR1,TR…
BTO:0001363	Testis	157	1756	0.17	6.47e-05	9606.ENSP00000013070,9606.ENSP00000075120,9606.ENSP00000159111,9606.ENSP00000212015,9606.ENSP00000215862,9606.ENSP00000216554,9606.ENSP00000219070,9606.ENSP00000222574,9606.ENSP00000225792,9606.ENSP00000230461,9606.ENSP00000237264,9606.ENSP00000246194,9606.ENSP00000250559,9606.ENSP00000255120,9606.ENSP00000255977,9606.ENSP00000256078,9606.ENSP00000258145,9606.ENSP00000258198,9606.ENSP00000258418,…	UBR7,SLC2A3,KDM4B,SIRT1,MORC2,EIF5,MMP2,HBP1,DDX5,TMEM30A,TBPL1,RALY,RAP1B,NASP,MKRN1,KRAS,GNS,DYNC1LI2,CAB39,KAT7,RNF38,ITGAV,MSMO1,CLCN3,RORA,RNF138,ARL1,RBL2,ZNF106,AKT3,ARID4B,DNMT3A,LEF1,PRKAR2A,ANLN,ABHD2,ZCCHC14,FEM1C,CDK16,SMARCA5,APP,CLDN12,PDPR,WIPI2,PDXK,CPSF2,USP32,THOP1,ARL6IP1,RPL15,DPYSL2,SLCO3A1,GLYR1,MBOAT1,DDHD1,MIEF1,PPM1A,FBXO21,DNMT3B,SP1,EMC10,KPNA4,CMTR2,MTDH,LRRFIP2,ACSL4,…
BTO:0000426	Erythroleukemia cell	35	225	0.41	0.00011	9606.ENSP00000212015,9606.ENSP00000215832,9606.ENSP00000225577,9606.ENSP00000225792,9606.ENSP00000229795,9606.ENSP00000252674,9606.ENSP00000261254,9606.ENSP00000262238,9606.ENSP00000262241,9606.ENSP00000264193,9606.ENSP00000264657,9606.ENSP00000264709,9606.ENSP00000316578,9606.ENSP00000328547,9606.ENSP00000329357,9606.ENSP00000329933,9606.ENSP00000341826,9606.ENSP00000345728,9606.ENSP00000352516,…	SIRT1,MAPK1,RPS6KB1,DDX5,MAPK14,MLLT1,CCND2,YY1,RCOR1,CPOX,STAT3,DNMT3A,SUZ12,DNMT3B,SP1,PHF12,HNRNPA1,ATP7A,DNMT1,TOP1,NFIA,PTPN1,PIGA,SRSF2,ETS1,BCL2L11,AGFG1,CREB1,CHEK1,STMN1,KMT2A,DICER1,TET2,ITGB3,NR2C2
BTO:0001491	Viscus	366	5020	0.08	0.0013	9606.ENSP00000075120,9606.ENSP00000209875,9606.ENSP00000212015,9606.ENSP00000215832,9606.ENSP00000216185,9606.ENSP00000216554,9606.ENSP00000216911,9606.ENSP00000219313,9606.ENSP00000219479,9606.ENSP00000220597,9606.ENSP00000221462,9606.ENSP00000222305,9606.ENSP00000222482,9606.ENSP00000225792,9606.ENSP00000227507,9606.ENSP00000228506,9606.ENSP00000228872,9606.ENSP00000229795,9606.ENSP00000230461,…	SLC2A3,CBX5,SIRT1,MAPK1,TXN2,EIF5,AURKA,PSMD7,NME4,PAG1,PPP1R37,USF2,CPA4,DDX5,CCND1,MLEC,CDKN1B,MAPK14,TMEM30A,NR3C1,MAPRE3,PKD2,YIPF4,NFYB,NAA50,ACVR2A,SSR1,IRF1,RALY,SNAP23,EGLN3,MKNK2,SALL1,ACTN4,MAP3K10,NDFIP1,NASP,MKRN1,KRAS,GNS,DYNC1LI2,LAMC1,CAB39,IGF2BP3,UGGT1,THBS1,ADAM10,ITGAV,OSBPL8,TBC1D1,MSMO1,CLCN3,RORA,ARL1,MMD,MTUS1,RBL2,SMAD2,TRAM1,YY1,N4BP1,SPTLC1,CCDC6,EED,KAT2B,AKT3,ARID4B,CP…
BTO:0003096	Internal male genital organ	181	2229	0.13	0.002	9606.ENSP00000013070,9606.ENSP00000075120,9606.ENSP00000159111,9606.ENSP00000212015,9606.ENSP00000215862,9606.ENSP00000216554,9606.ENSP00000219070,9606.ENSP00000222574,9606.ENSP00000225792,9606.ENSP00000230461,9606.ENSP00000237264,9606.ENSP00000244050,9606.ENSP00000246194,9606.ENSP00000250559,9606.ENSP00000252699,9606.ENSP00000255120,9606.ENSP00000255977,9606.ENSP00000256078,9606.ENSP00000258145,…	UBR7,SLC2A3,KDM4B,SIRT1,MORC2,EIF5,MMP2,HBP1,DDX5,TMEM30A,TBPL1,SNAI1,RALY,RAP1B,ACTN4,NASP,MKRN1,KRAS,GNS,DYNC1LI2,CAB39,KAT7,RNF38,THBS1,ITGAV,MSMO1,CLCN3,RORA,RNF138,ARL1,RBL2,ZNF106,AKT3,ARID4B,DNMT3A,GALNT7,LEF1,PRKAR2A,ANLN,ABHD2,ZCCHC14,FEM1C,CDK16,MBNL1,SMARCA5,APP,CLDN12,PDPR,WIPI2,PDXK,CPSF2,USP32,THOP1,ARL6IP1,RPL15,DPYSL2,FBXO31,REST,SLCO3A1,GLYR1,MBOAT1,DDHD1,MIEF1,PPM1A,FBXO21,DNMT3…
BTO:0001541	Pronephros	28	195	0.38	0.0037	9606.ENSP00000228872,9606.ENSP00000229795,9606.ENSP00000238497,9606.ENSP00000263826,9606.ENSP00000264951,9606.ENSP00000265343,9606.ENSP00000281708,9606.ENSP00000288266,9606.ENSP00000298552,9606.ENSP00000312995,9606.ENSP00000323421,9606.ENSP00000368966,9606.ENSP00000371472,9606.ENSP00000376943,9606.ENSP00000384763,9606.ENSP00000385720,9606.ENSP00000387699,9606.ENSP00000388648,9606.ENSP00000392147,…	CDKN1B,MAPK14,VPS4B,AKT3,XRN1,AFF4,FBXW7,APPL1,TSC1,CLSPN,SMC1A,TRPC3,NIN,BCL2L11,SLC8A1,ARHGAP35,CREB1,CHEK1,PPP6C,SESN1,HMGA1,TRIM32,STMN1,PHC3,H2AFX,TET2,DDX6,YAP1
BTO:0000203	Respiratory system	124	1436	0.16	0.0037	9606.ENSP00000005178,9606.ENSP00000005257,9606.ENSP00000075120,9606.ENSP00000215832,9606.ENSP00000219070,9606.ENSP00000225577,9606.ENSP00000225792,9606.ENSP00000228506,9606.ENSP00000230461,9606.ENSP00000230859,9606.ENSP00000237937,9606.ENSP00000245323,9606.ENSP00000253814,9606.ENSP00000255120,9606.ENSP00000256078,9606.ENSP00000257290,9606.ENSP00000260356,9606.ENSP00000261514,9606.ENSP00000261707,…	PDK4,RALA,SLC2A3,MAPK1,MMP2,RPS6KB1,DDX5,MLEC,TMEM30A,PAPD7,ZFAND5,EFNB2,NDFIP1,NASP,KRAS,PDGFRA,THBS1,CLCN3,SLC6A4,MEOX2,MTUS1,RBL2,YY1,UBE2R2,PIK3CA,STAT3,DNMT3A,VCAN,CACNA1C,ARHGDIA,SIK1,SH3BGRL3,PRCC,RALB,DLC1,SMARCA5,APP,KIT,ARF6,CRK,BCL2L1,IL13,RPL15,MOB4,BACE1,CYBRD1,NPEPPS,HMGCS1,PPP2R2A,PPM1A,SRPR,KDELR1,PDGFB,RAB11FIP1,UBE2V1,HNRNPA1,NF2,MAP2K3,UBE2I,ADIPOR2,RAD23B,MAX,FUT8,TOP1,SEPN1,N…
BTO:0000478	Forebrain	126	1473	0.15	0.0045	9606.ENSP00000075120,9606.ENSP00000198767,9606.ENSP00000222305,9606.ENSP00000222812,9606.ENSP00000230461,9606.ENSP00000232496,9606.ENSP00000241416,9606.ENSP00000245304,9606.ENSP00000247178,9606.ENSP00000250559,9606.ENSP00000253063,9606.ENSP00000254657,9606.ENSP00000258418,9606.ENSP00000260746,9606.ENSP00000261205,9606.ENSP00000261507,9606.ENSP00000261537,9606.ENSP00000261707,9606.ENSP00000263934,…	SLC2A3,RRN3,USF2,STX1A,TMEM30A,TUSC2,ACVR2A,RAP2A,ATG14,RAP1B,SESN2,PER2,CAB39,ARL3,SYT1,MSMO1,MIB1,SLC6A4,KIF1B,CPOX,PCDH10,CPEB4,LEF1,CACNA1C,ARHGDIA,PRCC,ARL8A,RALB,CDK16,SLC1A2,ZC3H12C,EPHA4,RANBP2,HOXA10,APP,KLF10,HMGCR,TGFA,MITF,LRRK2,SOCS5,FEM1B,NPTX1,CLOCK,NR1D2,GLTP,HADHB,CARM1,SRPR,PHF6,SNN,PDE4B,NDEL1,LYPD6,AP1S1,NIPA1,RAP2C,MEF2A,ADIPOR2,ZDHHC9,MAX,MAPK10,RAB5B,ZEB1,CAPZA2,SMOC1,SCAMP…
BTO:0000634	Integument	160	1970	0.13	0.0054	9606.ENSP00000212015,9606.ENSP00000219313,9606.ENSP00000220597,9606.ENSP00000221543,9606.ENSP00000225792,9606.ENSP00000227507,9606.ENSP00000228506,9606.ENSP00000231509,9606.ENSP00000237596,9606.ENSP00000237937,9606.ENSP00000238497,9606.ENSP00000238831,9606.ENSP00000245323,9606.ENSP00000253055,9606.ENSP00000255977,9606.ENSP00000258145,9606.ENSP00000258341,9606.ENSP00000258534,9606.ENSP00000259021,…	SIRT1,PSMD7,PAG1,TBC1D17,DDX5,CCND1,MLEC,NR3C1,PKD2,ZFAND5,VPS4B,YIPF4,EFNB2,MAP3K10,MKRN1,GNS,LAMC1,DRAM1,KAT7,THBS1,ITGAV,OSBPL8,CLCN3,RORA,ARL1,NAA25,AP4E1,MTUS1,DNMT3A,LEF1,IGF1R,ARHGDIA,SH3BGRL3,SLC20A1,PLK2,DSC2,SMARCA5,HOXA10,PPARG,KIT,WIPI2,NACC1,ARPC5,MITF,ARF6,IL13,CHST1,RPL15,FOSL1,KLK10,GLTP,AHCYL2,RPP25,CYBRD1,ARID1A,DCBLD2,SOX11,LASP1,CARM1,TRAK2,CREB3L2,SNN,KDELR1,ZFYVE16,MTDH,LRRF…
BTO:0000345	Digestive gland	201	2645	0.1	0.0205	9606.ENSP00000209875,9606.ENSP00000212015,9606.ENSP00000215832,9606.ENSP00000216185,9606.ENSP00000216554,9606.ENSP00000219313,9606.ENSP00000222305,9606.ENSP00000225726,9606.ENSP00000225792,9606.ENSP00000227507,9606.ENSP00000228506,9606.ENSP00000229795,9606.ENSP00000230461,9606.ENSP00000231509,9606.ENSP00000244763,9606.ENSP00000245414,9606.ENSP00000246194,9606.ENSP00000249647,9606.ENSP00000251020,…	CBX5,SIRT1,MAPK1,TXN2,EIF5,PSMD7,USF2,CCDC47,DDX5,CCND1,MLEC,MAPK14,TMEM30A,NR3C1,SSR1,IRF1,RALY,SNAP23,SALL1,ACTN4,SESN2,NASP,KRAS,LAMC1,IGF2BP3,UGGT1,THBS1,ADAM10,ITGAV,OSBPL8,TBC1D1,MSMO1,RBL2,SMAD2,YY1,KAT2B,AKT3,CPOX,STAT3,PPARGC1A,VCAN,ANLN,ABHD2,ARHGDIA,SH3BGRL3,MEF2D,SETD7,MARCH6,ZFP36L2,SMARCA5,RANBP2,APP,CSF1R,HMGCR,PDXK,ARPC5,STT3B,CFL2,ARF6,CRK,KLF13,IGF1,KIF5B,PPP1R3B,CLOCK,RPL15,RSF…
BTO:0000421	Connective tissue	78	871	0.17	0.0294	9606.ENSP00000075120,9606.ENSP00000219070,9606.ENSP00000222812,9606.ENSP00000231509,9606.ENSP00000239231,9606.ENSP00000246792,9606.ENSP00000253814,9606.ENSP00000262160,9606.ENSP00000263360,9606.ENSP00000264183,9606.ENSP00000264498,9606.ENSP00000265077,9606.ENSP00000266376,9606.ENSP00000269321,9606.ENSP00000274457,9606.ENSP00000283921,9606.ENSP00000284981,9606.ENSP00000287820,9606.ENSP00000296543,…	SLC2A3,MMP2,STX1A,NR3C1,PANK3,RRAS,NDFIP1,SMAD2,EED,ARID4B,FGF2,VCAN,CACNA1C,ARHGDIA,FEM1C,HOXA10,APP,PPARG,NAA15,CREBRF,IL13,RPL15,DPYSL2,GLTP,RBBP6,FAM46A,CRLF3,CYBRD1,HMGCS1,SMC1A,PPP2R2A,HADHB,KDELR1,ZNF449,UBE2V1,HNRNPA1,DNAJB12,ATP7A,UBE2D3,NF1,CAPZA2,SCAMP5,SCD,PTP4A1,RUNX2,STK4,GDF5,BMPR2,KLF4,SF1,PAN3,RDH11,FSCN1,HNRNPA3,YWHAZ,TCF4,FGFRL1,CDC42,ATP2B1,FAM126B,BZW1,DDOST,CAPZB,ZDHHC17,CNE…
BTO:0001546	Chronic lymphocytic leukemia cell	25	193	0.33	0.0314	9606.ENSP00000212015,9606.ENSP00000215832,9606.ENSP00000225577,9606.ENSP00000229795,9606.ENSP00000231509,9606.ENSP00000262133,9606.ENSP00000265165,9606.ENSP00000265734,9606.ENSP00000286827,9606.ENSP00000307604,9606.ENSP00000316578,9606.ENSP00000343288,9606.ENSP00000345571,9606.ENSP00000352516,9606.ENSP00000370196,9606.ENSP00000376943,9606.ENSP00000378578,9606.ENSP00000384625,9606.ENSP00000387699,…	SIRT1,MAPK1,RPS6KB1,MAPK14,NR3C1,RBL2,LEF1,CDK6,TIAM1,ZBTB5,SUZ12,FOXN3,E2F1,DNMT1,SBF1,BCL2L11,AFF1,NLK,CREB1,CHEK1,WEE1,PIK3R1,IKBKB,KMT2A,TET2
BTO:0001424	Uterus	88	1020	0.16	0.0374	9606.ENSP00000005178,9606.ENSP00000075120,9606.ENSP00000198767,9606.ENSP00000216554,9606.ENSP00000216911,9606.ENSP00000222574,9606.ENSP00000228872,9606.ENSP00000231509,9606.ENSP00000246792,9606.ENSP00000249647,9606.ENSP00000250559,9606.ENSP00000250896,9606.ENSP00000251119,9606.ENSP00000252699,9606.ENSP00000258198,9606.ENSP00000260356,9606.ENSP00000261183,9606.ENSP00000261254,9606.ENSP00000261745,…	PDK4,SLC2A3,RRN3,EIF5,AURKA,HBP1,CDKN1B,NR3C1,RRAS,SNAP23,RAP1B,MKNK2,ZFYVE26,ACTN4,DYNC1LI2,THBS1,OSBPL8,CCND2,NAA25,AP4E1,MTUS1,CCDC6,RAB10,ARHGDIA,HOXA10,MITF,SLMAP,ARF6,STAT6,DDIT4,ZBTB4,RPL15,KLK10,REST,DVL3,SUZ12,PLXND1,MBOAT1,ZFYVE16,STARD13,HNRNPA1,MEF2A,ADIPOR2,FXR1,RAD23B,MAX,RAB5B,MCL1,SLK,ELOVL5,XIAP,NKAP,TJAP1,KPNA6,OGT,KLF4,RCC2,IPO7,GDI2,NFIB,SACS,SH3BP5,ETS1,PRKAR1A,MTHFD2,YWHAZ,P…
