# Supplementary material for: The microRNA Cargo of Human Vaginal Extracellular Vesicles Differentiates Parasitic and Pathobiont Infections from Colonization by Homeostatic Bacteria
Source: Microorganisms. 2023 Feb 21;11(3):551. doi: 10.3390/microorganisms11030551 (PMC10054151; doi:10.3390/microorganisms11030551)
Supplement: Supplementary file 1 [file microorganisms-11-00551-s001.zip › supplemental_info_final-20230221/Table S5 genes top-3 clusters.xlsx]

## Sheet: Sheet1
Genes belonging to the top-3 clusters from merged network
Gene ID	Gene name	cluster#
ABL2	ABL Proto-Oncogene 2, Non-Receptor Tyrosine Kinase	1
BCL2	BCL2 Apoptosis Regulator	1
CREB1	CAMP Responsive Element Binding Protein 1	1
CRK	CRK Proto-Oncogene, Adaptor Protein	1
DUSP2	Dual Specificity Phosphatase 2	1
DUSP5	Dual Specificity Phosphatase 5	1
E2F6	E2F Transcription Factor 6	1
ELK4	ETS Transcription Factor ELK4	1
ETV1	ETS Variant Transcription Factor 1	1
HBP1	HMG-Box Transcription Factor 1	1
KANSL1	KAT8 Regulatory NSL Complex Subunit 1	1
MAPK1	Mitogen-Activated Protein Kinase 1	1
MAPK14	Mitogen-Activated Protein Kinase 14	1
MAX	MYC Associated Factor X	1
MECP2	Methyl-CpG Binding Protein 2	1
MEF2A	Myocyte Enhancer Factor 2A	1
MEF2C	Myocyte Enhancer Factor 2C	1
MEF2D	Myocyte Enhancer Factor 2D	1
MITF	Melanocyte Inducing Transcription Factor	1
MKNK2	MAPK Interacting Serine/Threonine Kinase 2	1
MXD1	MAX Dimerization Protein 1	1
MXI1	MAX Interactor 1, Dimerization Protein	1
NR5A2	Nuclear Receptor Subfamily 5 Group A Member 2	1
PEA15	Proliferation And Apoptosis Adaptor Protein 15	1
PIN1	Peptidylprolyl Cis/Trans Isomerase, NIMA-Interacting 1	1
PPARGC1A	PPARG Coactivator 1 Alpha	1
PRKCH	Protein Kinase C Eta	1
PTPN4	Protein Tyrosine Phosphatase Non-Receptor Type 4	1
RBFOX1	RNA Binding Fox-1 Homolog 1	1
RPS6KA3	Ribosomal Protein S6 Kinase A3	1
RPS6KA5	Ribosomal Protein S6 Kinase A5	1
SLC2A3	Solute Carrier Family 2 Member 3	1
TRPC3	Transient Receptor Potential Cation Channel Subfamily C Member 3	1
ABHD17C	Abhydrolase Domain Containing 17C, Depalmitoylase	2
COL4A5	Collagen Type IV Alpha 5 Chain	2
CSF1R	Colony Stimulating Factor 1 Receptor	2
FGFR1	Fibroblast Growth Factor Receptor 1	2
IGF1R	Insulin Like Growth Factor 1 Receptor	2
ITGA9	Integrin Subunit Alpha 9	2
ITGAV	Integrin Subunit Alpha V	2
ITGB3	Integrin Subunit Beta 3	2
ITGB8	Integrin Subunit Beta 8	2
KRAS	KRAS Proto-Oncogene, GTPase	2
MET	MET Proto-Oncogene, Receptor Tyrosine Kinase	2
NRAS	NRAS Proto-Oncogene, GTPase	2
PIK3CA	Phosphatidylinositol-4,5-Bisphosphate 3-Kinase Catalytic Subunit Alpha	2
PIK3R1	Phosphoinositide-3-Kinase Regulatory Subunit 1	2
PRRT2	Proline Rich Transmembrane Protein 2	2
RALA	RAS Like Proto-Oncogene A	2
RALB	RAS Like Proto-Oncogene B	2
RASA1	RAS P21 Protein Activator 1	2
SH3KBP1	SH3 Domain Containing Kinase Binding Protein 1	2
SOS1	SOS Ras/Rac Guanine Nucleotide Exchange Factor 1	2
SOS2	SOS Ras/Rho Guanine Nucleotide Exchange Factor 2	2
TIAM1	TIAM Rac1 Associated GEF 1	2
ACVR1	Activin A Receptor Type 1	3
BMPR2	Bone Morphogenetic Protein Receptor Type 2	3
CTDSP2	CTD Small Phosphatase 2	3
FKBP1A	FKBP Prolyl Isomerase 1A	3
NR2C2	Nuclear Receptor Subfamily 2 Group C Member 2	3
PPM1A	Protein Phosphatase, Mg2+/Mn2+ Dependent 1A	3
RGMB	Repulsive Guidance Molecule BMP Co-Receptor B	3
SMAD1	SMAD Family Member 1	3
SMAD2	SMAD Family Member 2	3
SMAD5	SMAD Family Member 5	3
TGFB1	Transforming Growth Factor Beta 1	3
TGFB3	Transforming Growth Factor Beta 3	3
TGFBR1	Transforming Growth Factor Beta Receptor 1	3
TGFBR2	Transforming Growth Factor Beta Receptor 2	3
TGFBR3	Transforming Growth Factor Beta Receptor 3	3
ZFYVE16	Zinc Finger FYVE-Type Containing 16	3
ZFYVE9	Zinc Finger FYVE-Type Containing 9	3
